# Supplementary material for: Identification of fertility-related genes for maize CMS-S via Bulked Segregant RNA-Seq
Source: PeerJ journal article supplement (doi:10.7717/peerj.10015), 2020-09-30
Supplement: Figure_S1_.pdf [file Figure_S1_.pdf]

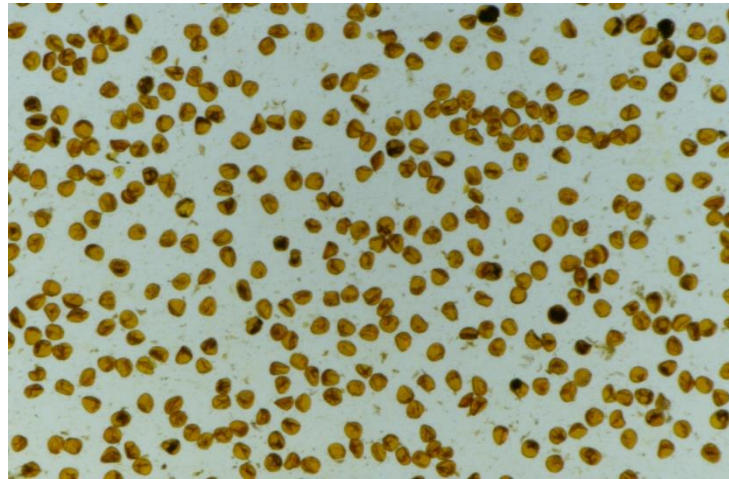

S-CMS $rf3rf3rf10rf10$

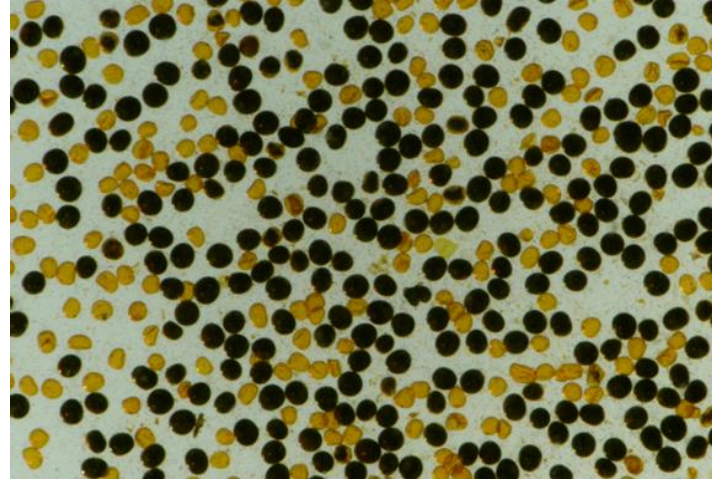

S-CMS $Rf3rf3rf10rf10$

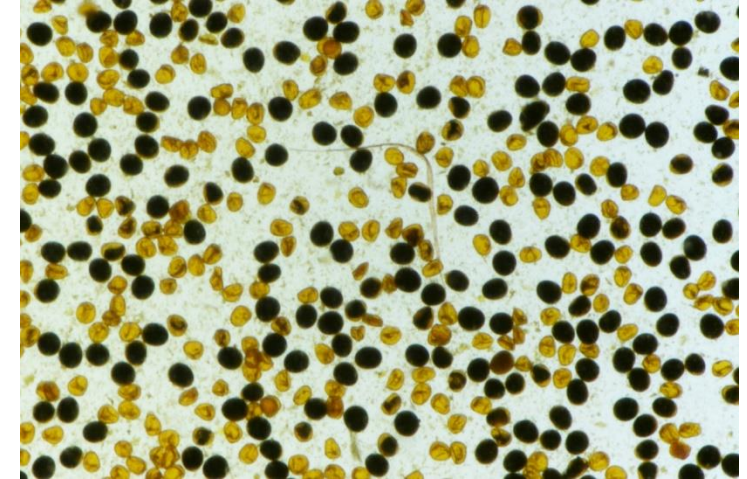

S-CMS $rf3rf3Rf10rf10$

Figure S1 pollen fertility in the sterile (with un-exserted anthers) and fertile plants (with exserted anthers) of the two populations
