# Supplementary material for: Identification of fertility-related genes for maize CMS-S via Bulked Segregant RNA-Seq
Source: PeerJ journal article supplement (doi:10.7717/peerj.10015), 2020-09-30
Supplement: Figure_S4.pdf [file Figure_S4.pdf]

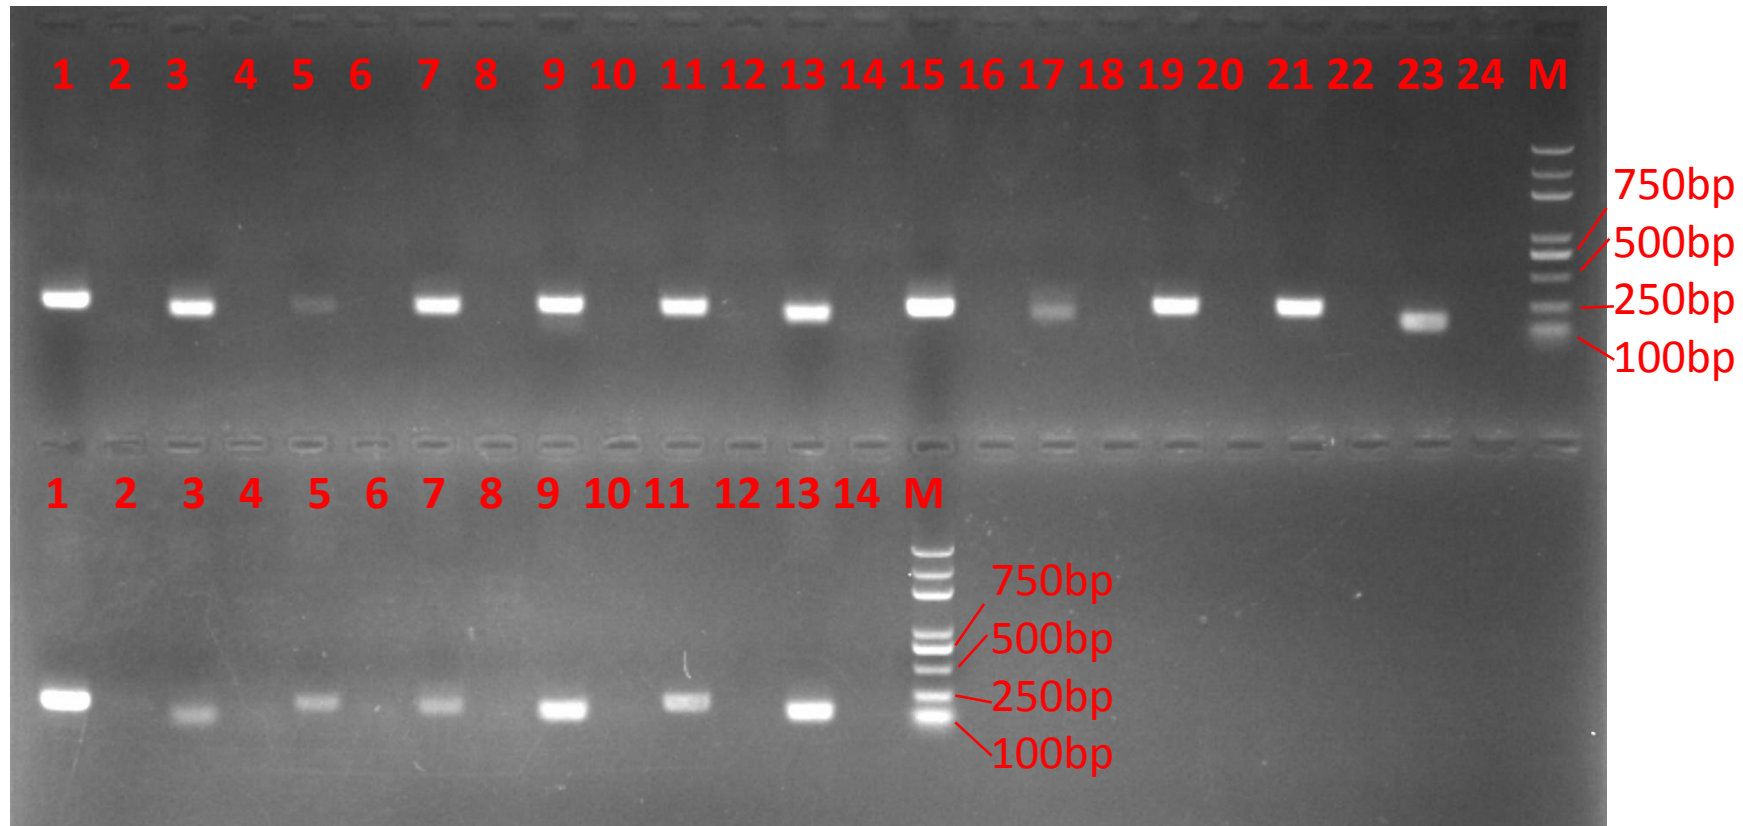

Figure S4: Odd number lane mean PCR amplification Include template; even numbers lane mean no template PCR.  
 First row: Lane1-2:*GRMZM2G024887*; Lane3-4:*GRMZM2G072448*; Lane5-6;*GRMZM2G300969*; Lane7-8;*GRMZM2G347047*;  
 Lane9-10:*GRMZM2G390678*; Lane11-12;*GRMZM2G401874*; Lane13-14;*GRMZM2G419452*; Lane15-16;*GRMZM2G454608*;  
 Lane17-18:*GRMZM2G045030*; Lane19-20;*GRMZM2G109973*; Lane21-22;*GRMZM2G339781*; Lane13-14;*GRMZM2G435294*.  
 Seconed row: Lane1-2:*AC209946.4-FG001*; Lane3-4:*GRMZM2G020761*; Lane5-6;*GRMZM2G024680*; Lane7-  
 8;*GRMZM2G127418*; Lane9-10:*GRMZM2G322493*; Lane11-12;*GRMZM2G457789*; Lane13-14; *LOC100282267*
