# Supplementary material for: Identification of fertility-related genes for maize CMS-S via Bulked Segregant RNA-Seq
Source: PeerJ. 2020 Sep 30;8:e10015. doi: 10.7717/peerj.10015 (PMC7532766; doi:10.7717/peerj.10015)
Supplement: Supplemental Information 1 [file peerj-08-10015-s001.xlsx]

## Sheet: GRMZM2G045030
	Cq	5030	actin	d-Ct	average(d-Ct)	STDEV(d-Ct)	d-d-Ct	2-dd-Ct	STDEV(d-d-Ct)上	STDEV(2-dd-Ct)	STDEV上	STDEV(d-d-Ct)下	STDEV(2-dd-Ct)下	stdev下
	rf1	25.3684	19.2148	6.15355	6.10724	0.0654885	0	1	-0.0654885	1.04644	0.0464392	0.0654885	0.955622	-0.0443783
		25.3141	19.2532	6.06093
	rf2	25.5151	18.8971	6.61803	6.44176	0.249273	0.334521	0.793047	0.0852484	0.942622	0.149575	0.583794	0.667207	-0.125841
		25.3885	19.123	6.2655
	rf3	24.9223	18.5005	6.42185	6.23082	0.270162	0.123574	0.917911	-0.146588	1.10695	0.189038	0.393736	0.761156	-0.156755
		24.5919	18.5521	6.03978
	RF31	18.3585	20.1605	-1.80197	-1.90857	0.150753	-8.01581	258.821	-8.16657	287.33	28.5088	-7.86506	233.141	-25.6802
		18.0793	20.0945	-2.01517
	RF32	19.0051	21.3477	-2.34254	-2.32134	0.0299736	-8.42858	344.553	-8.45856	351.786	7.23336	-8.39861	337.468	-7.08463
		18.714	21.0142	-2.30015
	RF33	17.0682	19.6985	-2.63031	-2.65356	0.0328806	-8.76081	433.776	-8.79369	443.776	9.99975	-8.72793	424.001	-9.77442
		17.0552	19.732	-2.67681
	RF101	19.0601	21.3815	-2.32138	-2.44635	0.176734	-8.55359	375.739	-8.73032	424.706	48.9672	-8.37685	332.418	-43.3215
		18.8367	21.408	-2.57132
	RF102	19.808	21.8046	-1.99661	-1.94401	0.0743973	-8.05125	265.257	-8.12564	279.295	14.0377	-7.97685	251.925	-13.3321
		19.8192	21.7106	-1.8914
	RF103	18.1954	20.1139	-1.91851	-1.95703	0.0544791	-8.06427	267.663	-8.11875	277.964	10.3008	-8.00979	257.744	-9.91904
		18.187	20.1825	-1.99555
		Mean	SD	P value
	rf	0.903653	0.104211
	Rf3	345.717	87.483	0.00240751
	Rf10	302.886	63.1037	0.00115663

## Sheet: GRMZM2G024887
	Cq	4887	qactin	d-Ct	average(d-Ct)	STDEV(d-Ct)	d-d-Ct	2-dd-Ct	STDEV(d-d-Ct)上	STDEV(2-dd-Ct)	STDEV上	STDEV(d-d-Ct)下	STDEV(2-dd-Ct)下	stdev下
	rf1	29.9602	24.5067	5.45355	5.58968	0.192506	0.0120001	0.991717	-0.180506	1.13328	0.141565	0.204506	0.867836	-0.123881
		30.1127	24.3869	5.7258
	rf2	30.7512	25.3377	5.41349	5.57369	0.226558	-0.00398999	1.00277	-0.230548	1.17328	0.170511	0.222568	0.857039	-0.145731
		30.8007	25.0668	5.73389
	rf3	29.9797	24.4483	5.53142	5.57768	0.065417	0	1	-0.065417	1.04639	0.0463874	0.065417	0.955669	-0.044331
		29.7765	24.1526	5.62393
	RF31	20.2041	22.0455	-1.84138	-1.68584	0.219966	-7.26351	153.651	-7.48348	178.958	25.3073	-7.04355	131.923	-21.7285
		20.4821	22.0124	-1.5303
	RF32	23.4822	24.658	-1.17578	-1.32325	0.208556	-6.90093	119.505	-7.10948	138.092	18.5867	-6.69237	103.42	-16.085
		23.3753	24.846	-1.47072
	RF33	21.8867	24.0078	-2.12104	-1.83837	0.399756	-7.41605	170.786	-7.81581	225.316	54.5295	-7.01629	129.454	-41.3326
		21.8701	23.4258	-1.5557
	RF101	22.4249	22.5137	-0.0888239	-0.0900206	0.00169239	-5.6677	50.8331	-5.66939	50.8928	0.0596661	-5.666	50.7735	-0.0595962
		22.3436	22.4348	-0.0912173
	RF102	27.5406	27.4569	0.0837301	0.470267	0.546646	-5.10741	34.4733	-5.65405	50.3547	15.8814	-4.56076	23.6008	-10.8725
		28.0256	27.1688	0.856805
	RF103	22.2433	22.4044	-0.161033	-0.188539	0.0388996	-5.76621	54.4256	-5.80511	55.9131	1.48745	-5.72732	52.9778	-1.44788
		22.1247	22.3407	-0.216045
		Mean	SD	P value
	rf	0.998162	0.00575105
	Rf3	147.981	26.1068	0.000619453
	Rf10	46.5774	10.6352	0.00175802

## Sheet: GRMZM2G109973
	Cq	9973	qactin	d-Ct	average(d-Ct)	STDEV(d-Ct)	d-d-Ct	2-dd-Ct	STDEV(d-d-Ct)上	STDEV(2-dd-Ct)	STDEV上	STDEV(d-d-Ct)下	STDEV(2-dd-Ct)下	stdev下
	rf1	33.398	26.0733	7.32469	7.47356	0.21053	0.403401	0.756074	0.192871	0.874863	0.118789	0.613932	0.653414	-0.10266
		33.5668	25.9443	7.62243
	rf2	32.8648	25.878	6.98677	7.07016	0.117925	0	1	-0.117925	1.08517	0.0851728	0.117925	0.921512	-0.0784878
		33.0072	25.8536	7.15355
	rf3	32.016	24.8185	7.1975	7.17673	0.0293664	0.10657	0.928794	0.0772037	0.947893	0.0190995	0.135936	0.910079	-0.0187147
		32.0139	24.858	7.15596
	RF31	27.5417	27.7547	-0.21296	0.889397	1.55897	-6.18076	72.5429	-7.73973	213.743	141.2	-4.62179	24.6206	-47.9223
		28.0146	26.0228	1.99176
	RF32	27.0419	26.7563	0.28564	0.948212	0.937019	-6.12195	69.645	-7.05897	133.34	63.6951	-5.18493	36.3764	-33.2686
		27.4464	25.8356	1.61078
	RF33	24.1431	23.2649	0.878189	0.777511	0.142381	-6.29265	78.3928	-6.43503	86.5241	8.13131	-6.15027	71.0256	-7.36715
		23.9891	23.3123	0.676832
	RF101	23.3823	22.7176	0.664724	0.95624	0.412266	-6.11392	69.2585	-6.52619	92.1675	22.9089	-5.70165	52.0438	-17.2147
		23.8047	22.5569	1.24776
	RF102	24.2759	22.9559	1.31997	1.44652	0.178959	-5.62364	49.3043	-5.8026	55.8158	6.51148	-5.44468	43.5525	-5.75185
		24.5198	22.9467	1.57306
	RF103	24.6428	23.3416	1.30114	1.17545	0.177755	-5.89471	59.4955	-6.07246	67.2967	7.80119	-5.71695	52.5987	-6.89686
		24.5058	23.456	1.04976
		Mean	SD	P value
	rf	0.894956	0.125434
	Rf3	73.5269	4.45614	9.38199e-06
	Rf10	59.3528	9.97787	0.000531148

## Sheet: GRMZM2G300969
	Cq	o969	actin	d-Ct	average(d-Ct)	STDEV(d-Ct)	d-d-Ct	2-dd-Ct	STDEV(d-d-Ct)上	STDEV(2-dd-Ct)	STDEV上	STDEV(d-d-Ct)下	STDEV(2-dd-Ct)下	stdev下
	rf1	26.2772	21.0401	5.23707	5.5018	0.374389	0.126264	0.916201	-0.248125	1.18766	0.271461	0.500653	0.706787	-0.209414
		26.359	20.5924	5.76654
	rf2	25.3199	19.9329	5.387	5.37554	0.0162047	0	1	-0.0162047	1.0113	0.0112955	0.0162047	0.988831	-0.0111694
		24.9158	19.5517	5.36408
	rf3	26.5921	20.9033	5.68882	5.49297	0.276972	0.117434	0.921826	-0.159538	1.11693	0.195104	0.394407	0.760802	-0.161023
		26.4183	21.1212	5.29713
	RF31	20.4057	22.2383	-1.83253	-1.81795	0.0206166	-7.1935	146.372	-7.21411	148.479	2.10672	-7.17288	144.295	-2.07683
		20.2919	22.0953	-1.80338
	RF32	18.6147	20.9243	-2.30962	-2.47061	0.227683	-7.84615	230.106	-8.07384	269.443	39.3373	-7.61847	196.512	-33.5943
		18.3309	20.9625	-2.63161
	RF33	18.8553	20.8617	-2.00645	-2.18606	0.254013	-7.5616	188.916	-7.81562	225.287	36.3701	-7.30759	158.418	-30.4985
		18.5994	20.9651	-2.36568
	RF101	21.244	21.1261	0.117857	-0.0307247	0.210126	-5.40626	42.408	-5.61639	49.0571	6.64911	-5.19614	36.6601	-5.7479
		20.9368	21.1161	-0.179306
	RF102	21.4154	21.9318	-0.516397	-0.424943	0.129335	-5.80048	55.7339	-5.92982	60.9612	5.22727	-5.67115	50.9549	-4.77904
		21.1476	21.4811	-0.333489
	RF103	22.6917	22.3435	0.348194	-0.0960059	0.628194	-5.47155	44.371	-6.09974	68.5811	24.2101	-4.84335	28.7074	-15.6636
		22.2821	22.8223	-0.540206
		Mean	SD	P value
	rf	0.946009	0.0468422
	Rf3	188.465	41.8688	0.00148816
	Rf10	47.5043	7.19431	0.000360755

## Sheet: GRMZM2G339781
	Cq	9781	actin	d-Ct	average(d-Ct)	STDEV(d-Ct)	d-d-Ct	2-dd-Ct	STDEV(d-d-Ct)上	STDEV(2-dd-Ct)	STDEV上	STDEV(d-d-Ct)下	STDEV(2-dd-Ct)下	stdev下
	rf1	33.8151	20.0379	13.7773	13.7077	0.0984095	0	1	-0.0984095	1.07059	0.0705926	0.0984095	0.934062	-0.0659378
		33.4181	19.78	13.6381
	rf2	33.1042	19.9923	13.112	13.3235	0.299147	-0.384169	1.30511	-0.683316	1.60583	0.300718	-0.0850221	1.0607	-0.244404
		33.2459	19.7108	13.535
	rf3	35.4065	21.2966	14.1099	14.223	0.159925	0.515292	0.699651	0.355368	0.78167	0.0820193	0.675217	0.626238	-0.0734131
		35.5661	21.23	14.3361
	RF31	30.2407	19.9398	10.3009	10.3558	0.077726	-3.35187	10.2097	-3.42959	10.7748	0.565139	-3.27414	9.67419	-0.535498
		30.1202	19.7094	10.4108
	RF32	33.0077	22.7911	10.2166	10.2147	0.00274212	-3.49299	11.2589	-3.49573	11.2803	0.02142	-3.49025	11.2375	-0.0213794
		32.948	22.7352	10.2128
	RF33	31.177	20.8617	10.3153	10.2537	0.0871185	-3.45397	10.9584	-3.54109	11.6406	0.682124	-3.36685	10.3163	-0.642152
		31.1572	20.9651	10.1921
	RF101	33.5828	21.1261	12.4567	12.5098	0.0751003	-1.19789	2.29404	-1.27299	2.41662	0.12258	-1.12279	2.17767	-0.116362
		33.679	21.1161	12.5629
	RF102	33.7825	21.9318	11.8507	12.1938	0.485115	-1.51393	2.85587	-1.99904	3.99735	1.14148	-1.02881	2.04035	-0.815521
		34.0179	21.4811	12.5368
	RF103	33.9293	22.3435	11.5858	11.9499	0.514895	-1.75776	3.38172	-2.27265	4.8321	1.45039	-1.24286	2.36667	-1.01504
		34.1364	21.8223	12.314
		Mean	SD	P value
	rf	1.00159	0.302731
	Rf3	10.809	0.540326	1.051e-05
	Rf10	2.84387	0.54394	0.00685786

## Sheet: GRMZM2G347047
	Cq	7074		d-Ct	average(d-Ct)	STDEV(d-Ct)	d-d-Ct	2-dd-Ct	STDEV(d-d-Ct)上	STDEV(2-dd-Ct)	STDEV上	STDEV(d-d-Ct)下	STDEV(2-dd-Ct)下	stdev下
	rf1	32.028	24.724	7.304	7.50447	0.283503	0.391218	0.762485	0.107715	0.928057	0.165571	0.674722	0.626453	-0.136032
		32.328	24.6231	7.70494
	rf2	33.6246	26.7147	6.90983	7.11325	0.287678	0	1	-0.287678	1.22067	0.220674	0.287678	0.81922	-0.18078
		34.0877	26.771	7.31667
	rf3	31.0438	23.4326	7.61127	7.54567	0.0927773	0.432412	0.741022	0.339635	0.790241	0.0492195	0.52519	0.694868	-0.0461539
		31.0243	23.5442	7.48006
	RF31	26.7304	27.1261	-0.395721	-0.410866	0.0214176	-7.52412	184.071	-7.54554	186.824	2.75302	-7.5027	181.359	-2.71245
		26.6014	27.0275	-0.426011
	RF32	27.8777	27.772	0.105651	-0.156604	0.370884	-7.26986	154.328	-7.64074	199.569	45.2405	-6.89897	119.343	-34.9849
		28.0526	28.4715	-0.418858
	RF33	26.5251	27.3756	-0.850439	-0.77502	0.106658	-7.88827	236.923	-7.99493	255.102	18.1793	-7.78162	220.039	-16.8838
		26.2393	26.9389	-0.699602
	RF101	24.7629	22.5988	2.16404	2.10334	0.085829	-5.00991	32.2205	-5.09574	34.1956	1.97504	-4.92408	30.3596	-1.86096
		24.5902	22.5476	2.04265
	RF102	24.4661	23.232	1.23415	1.79418	0.792004	-5.31907	39.9209	-6.11108	69.1222	29.2013	-4.52707	23.056	-16.8649
		25.1134	22.7592	2.35421
	RF103	24.1537	22.4044	1.74935	1.85337	0.14711	-5.25988	38.3161	-5.40699	42.4293	4.11319	-5.11277	34.6016	-3.71444
		24.2981	22.3407	1.9574
		Mean	SD	P value
	rf	0.834502	0.143726
	Rf3	191.774	41.8327	0.00138496
	Rf10	36.8192	4.06258	0.000105563

## Sheet: GRMZM2G390678
	Cq	o678	actin	d-Ct	average(d-Ct)	STDEV(d-Ct)	d-d-Ct	2-dd-Ct	STDEV(d-d-Ct)上	STDEV(2-dd-Ct)	STDEV上	STDEV(d-d-Ct)下	STDEV(2-dd-Ct)下	stdev下
	rf1	30.9969	21.0401	9.95679	10.3723	0.587677	0	1	-0.587677	1.50282	0.502825	0.587677	0.665414	-0.334586
		31.3803	20.5924	10.7879
	rf2	31.9134	21.2099	10.7035	10.5508	0.215987	0.178411	0.883676	-0.0375756	1.02639	0.142712	0.394398	0.760807	-0.122869
		31.796	21.398	10.398
	rf3	32.5621	21.8083	10.7538	10.6419	0.15834	0.269515	0.829598	0.111175	0.925834	0.0962352	0.427855	0.743366	-0.0862321
		32.2147	21.6848	10.5299
	RF31	22.6132	20.8617	1.75149	1.64073	0.156647	-8.73162	425.088	-8.88826	473.842	48.7548	-8.57497	381.349	-43.7383
		22.495	20.9651	1.52996
	RF32	22.1899	20.0543	2.13561	2.05521	0.113711	-8.31713	318.938	-8.43084	345.094	26.1554	-8.20342	294.765	-24.173
		22.0702	20.0954	1.9748
	RF33	23.1272	21.1199	2.00724	2.12482	0.166278	-8.24753	303.915	-8.4138	341.042	37.1263	-8.08125	270.831	-33.0847
		23.2904	21.0481	2.24239
	RF101	24.3703	21.1261	3.24414	3.28285	0.0547533	-7.08949	136.191	-7.14424	141.459	5.26806	-7.03473	131.119	-5.07188
		24.4377	21.1161	3.32157
	RF102	25.2304	22.3235	2.90697	3.28397	0.533158	-7.08837	136.086	-7.62153	196.929	60.8432	-6.55522	94.0408	-42.0451
		25.4833	21.8223	3.66097
	RF103	23.7439	20.7166	3.02732	3.05352	0.037052	-7.31882	159.656	-7.35587	163.809	4.15346	-7.28177	155.608	-4.04815
		23.9866	20.9069	3.07972
		Mean	SD	P value
	rf	0.904425	0.0870751
	Rf3	349.314	66.0505	0.000796421
	Rf10	143.978	13.5778	5.30132e-05

## Sheet: GRMZM2G401874
	Cq	1874	actin	d-Ct	average(d-Ct)	STDEV(d-Ct)	d-d-Ct	2-dd-Ct	STDEV(d-d-Ct)上	STDEV(2-dd-Ct)	STDEV上	STDEV(d-d-Ct)下	STDEV(2-dd-Ct)下	stdev下
	rf1	27.1546	19.9329	7.22175	7.27484	0.075082	0	1	-0.075082	1.05342	0.0534209	0.075082	0.949288	-0.0507119
		26.8796	19.5517	7.32794
	rf2	27.7882	20.7826	7.0056	6.94714	0.0826712	-0.327707	1.25502	-0.410378	1.32903	0.0740171	-0.245036	1.18512	-0.0698949
		27.5511	20.6624	6.88868
	rf3	28.4332	21.2099	7.22327	6.95541	0.378809	-0.319438	1.24784	-0.698246	1.62253	0.374687	0.0593709	0.959682	-0.288162
		28.0855	21.398	6.68755
	RF31	24.1434	22.7911	1.35237	1.25146	0.142697	-6.02338	65.0456	-6.16608	71.8082	6.7626	-5.88068	58.9199	-6.12573
		23.8858	22.7352	1.15056
	RF32	21.8116	20.9243	0.887256	0.769336	0.166765	-6.50551	90.856	-6.67227	101.989	11.1333	-6.33874	80.938	-9.918
		21.614	20.9625	0.651415
	RF33	21.9869	20.8617	1.12519	0.970904	0.2182	-6.30394	79.0088	-6.52214	91.9094	12.9007	-6.08574	67.9189	-11.0899
		21.7817	20.9651	0.816613
	RF101	24.1086	21.1261	2.98252	2.81653	0.234736	-4.45831	21.9829	-4.69305	25.8671	3.8842	-4.22357	18.682	-3.30095
		23.7667	21.1161	2.65055
	RF102	23.6161	20.6886	2.92752	2.75313	0.246623	-4.52171	22.9706	-4.76834	27.2529	4.28232	-4.27509	19.3611	-3.60943
		23.4168	20.8381	2.57874
	RF103	24.5121	21.9318	2.58036	2.59162	0.0159153	-4.68323	25.6917	-4.69914	25.9766	0.284991	-4.66731	25.4098	-0.281864
		24.084	21.4811	2.60287
		Mean	SD	P value
	rf	1.16762	0.145208
	Rf3	78.3035	12.9196	0.000493614
	Rf10	23.5484	1.9207	3.59819e-05

## Sheet: GRMZM2G419452
	Cq	9452	qactin	d-Ct	average(d-Ct)	STDEV(d-Ct)	d-d-Ct	2-dd-Ct	STDEV(d-d-Ct)上	STDEV(2-dd-Ct)	STDEV上	STDEV(d-d-Ct)下	STDEV(2-dd-Ct)下	stdev下
	rf1	32.9789	26.928	6.05092	5.78888	0.370582	0.109213	0.927094	-0.261369	1.19862	0.271522	0.479795	0.71708	-0.210014
		32.6897	27.1628	5.52684
	rf2	34.1204	28.0978	6.02266	5.67967	0.48507	0	1	-0.48507	1.39965	0.399654	0.48507	0.714462	-0.285538
		33.445	28.1083	5.33667
	rf3	31.2148	25.3376	5.8772	5.90902	0.0449992	0.229358	0.853014	0.184359	0.88004	0.0270257	0.274357	0.826819	-0.0261958
		31.0863	25.1454	5.94084
	RF31	23.3104	25.2327	-1.92235	-2.05013	0.180709	-7.72979	212.276	-7.9105	240.602	28.3262	-7.54909	187.284	-24.9913
		22.9958	25.1737	-2.17791
	RF32	23.7508	24.7985	-1.04771	-1.18728	0.197383	-6.86694	116.723	-7.06433	133.836	17.1135	-6.66956	101.798	-14.9252
		23.4599	24.7868	-1.32685
	RF33	24.1697	26.0668	-1.89705	-1.87535	0.0306929	-7.55501	188.055	-7.5857	192.099	4.04368	-7.52432	184.096	-3.95856
		24.0491	25.9027	-1.85364
	RF101	22.5779	22.5988	-0.0209234	-0.055089	0.0483174	-5.73475	53.2516	-5.78307	55.0653	1.81366	-5.68644	51.4977	-1.75392
		22.4583	22.5476	-0.0892545
	RF102	23.2509	23.0643	0.186646	0.201465	0.0209574	-5.4782	44.5761	-5.49916	45.2284	0.652265	-5.45724	43.9333	-0.642858
		23.2433	23.027	0.216284
	RF103	22.5507	22.2409	0.309736	0.266568	0.0610489	-5.4131	42.6093	-5.47415	44.4511	1.84174	-5.35205	40.8439	-1.76543
		22.3409	22.1175	0.2234
		Mean	SD	P value
	rf	0.926703	0.0734936
	Rf3	172.351	49.6743	0.00393695
	Rf10	46.8124	5.66262	0.000149575

## Sheet: GRMZM2G072448
	Cq	2448	qactin	d-Ct	average(d-Ct)	STDEV(d-Ct)	d-d-Ct	2-dd-Ct	STDEV(d-d-Ct)上	STDEV(2-dd-Ct)	STDEV上	STDEV(d-d-Ct)下	STDEV(2-dd-Ct)下	stdev下
	rf1	26.9571	20.9033	6.05383	5.87555	0.252119	0	1	-0.252119	1.19096	0.190955	0.252119	0.839662	-0.160338
		26.8185	21.1212	5.69728
	rf2	25.6155	19.4795	6.13598	6.12659	0.0132843	0.251038	0.840292	0.237753	0.848065	0.00777312	0.264322	0.83259	-0.00770187
		25.3877	19.2705	6.11719
	rf3	25.8543	19.781	6.07326	6.15258	0.112178	0.277033	0.825286	0.164855	0.892018	0.0667316	0.389211	0.763547	-0.0617394
		25.6856	19.4537	6.23191
	RF31	21.7636	21.8431	-0.0794591	0.225884	0.431821	-5.64967	50.2018	-6.08149	67.7189	17.5172	-5.21785	37.2159	-12.9859
		21.8817	21.3504	0.531228
	RF32	23.1594	22.7911	0.36832	0.526523	0.223732	-5.34903	40.7585	-5.57276	47.5957	6.83726	-5.1253	34.9034	-5.85507
		23.42	22.7352	0.684725
	RF33	23.0127	22.3857	0.627	1.15435	0.745787	-4.7212	26.3768	-5.46699	44.231	17.8542	-3.97541	15.7296	-10.6472
		23.5137	21.832	1.6817
	RF101	19.247	21.9318	-2.68477	-2.21842	0.659522	-8.09397	273.229	-8.75349	431.582	158.353	-7.43445	172.978	-100.251
		19.729	21.4811	-1.75206
	RF102	19.7593	22.3435	-2.5842	-2.32871	0.361324	-8.20426	294.936	-8.56558	378.877	83.9403	-7.84294	229.593	-65.3433
		19.8491	21.9223	-2.07322
	RF103	18.899	21.1261	-2.22711	-2.18149	0.0645206	-8.05704	266.324	-8.12156	278.505	12.181	-7.99252	254.675	-11.6482
		18.9802	21.1161	-2.13586
		Mean	SD	P value
	rf	0.888526	0.0968304
	Rf3	39.1124	11.9975	0.00526524
	Rf10	278.163	14.9309	5.57e-06

[truncated: 8 more sheets: GRMZM2G454608, GRMZM2G435294, GRMZM2G024680, GRMZM2G020761, AC209946.4-FG001, GRMZM2G322493, GRMZM2G457789, GRMZM2G127418]
