# Supplementary material for: Identification of fertility-related genes for maize CMS-S via Bulked Segregant RNA-Seq
Source: PeerJ. 2020 Sep 30;8:e10015. doi: 10.7717/peerj.10015 (PMC7532766; doi:10.7717/peerj.10015)
Supplement: Table S1 [file peerj-08-10015-s006.xls]

## Sheet: DEG in P1
Gene ID	Chr	GeneStart	GeneEnd	P1-F*	P1-S*	P2-F*	P2-S*	log2FC*	Expression*	Function	KEGG	GO
AC184130.4_FG005	4	235835572	235836465	688	66	163	41	3.3	P	Fasciclin-like arabinogalactan protein 3		GO:0005737 GO:0016021 GO:0009987 GO:0030247 GO:0003824 GO:0008152 GO:0005886 GO:0050896 GO:0031225
AC189771.3_FG001	5	73325084	73325518	2485	159	951	84	3.89				GO:0005737 GO:0005672 GO:0007031 GO:0016881 GO:0006367 GO:0046872 GO:0055114 GO:0016491
AC190909.3_FG004	5	64363735	64367310	50	413	505	470	-3.09		Callose synthase 3		GO:0003843 GO:0000003 GO:0048869 GO:0016021 GO:0000148 GO:0016043 GO:0006075 GO:0065007 GO:0009653
AC194457.3_FG001	7	39580164	39581666	40	0	3	0	5.29	P	inositol transporter (ATINT4, INT4)		GO:0005355 GO:0009536 GO:0015992 GO:0031090 GO:0031410 GO:0006863 GO:0044237 GO:0003824 GO:0046323 GO:1904659 GO:0012505 GO:0005887 GO:0005351 GO:0098655 GO:0015798 GO:0090406 GO:0005366
AC196130.3_FG002	3	161302581	161302781	482	8	186	6	5.68	P			GO:0005488 GO:0044237
AC196278.2_FG003	4	208661138	208663313	3	56	61	66	-3.9		DNA polymerase delta catalytic subunit		GO:0008408 GO:0008622 GO:0006281 GO:0005730 GO:0016779 GO:0005654 GO:0000785 GO:0006261 GO:0003676
AC197013.3_FG003	7	159072030	159072692	19	221	312	255	-3.54	P	Insulin-degrading enzyme-like 1 peroxisomal		GO:0044710 GO:0044260 GO:0005634 GO:0031966 GO:0065007 GO:0006508 GO:0008233 GO:0046872 GO:0009507
AC197143.3_FG007	6	168571907	168572677	499	33	254	41	3.81	P	SCP-like extracellular protein expressed		GO:0016787 GO:0009536 GO:0005783 GO:0031410 GO:0009987 GO:0006952 GO:0016740 GO:0005488 GO:0008152 GO:0051707 GO:0051179
AC200210.1_FG006	3	226013901	226015597	12	106	154	168	-3.11		Zinc protease PQQL-like		GO:0051603 GO:0004222 GO:0005634 GO:0043171 GO:0031966 GO:0008270 GO:0016485 GO:0009507
AC203294.3_FG001	8	170828223	170830465	62	0	12	6	5.91	P	CAMK includes calcium/calmodulin depedent protein kinases		GO:0018105 GO:0015629 GO:0080092 GO:0005777 GO:0005789 GO:0009697 GO:0010359 GO:0009651 GO:0035556 GO:0046777 GO:0006984 GO:0031090 GO:0005773 GO:0009862 GO:0005634 GO:0009867 GO:0005509 GO:0046686 GO:0005524 GO:0043687 GO:0010119 GO:0005886 GO:0009789 GO:0009506 GO:0031982 GO:0010363 GO:0030968 GO:0004683 GO:0005829 GO:0009723 GO:0009931 GO:2000026 GO:0005516
AC203366.4_FG001	3	222490881	222495009	16	140	206	117	-3.12				GO:0006310 GO:0007127 GO:0006281 GO:0019219 GO:0000160 GO:0016021 GO:0032200 GO:0000166 GO:0044249 GO:0004871 GO:0004672 GO:0065008 GO:0023014
AC203535.4_FG006	3	157459235	157460062	79	8	39	24	3.09	P			GO:0006885 GO:0009987 GO:0032501 GO:0051234
AC205057.3_FG004	4	84864654	84867099	13	109	89	69	-3.04				GO:0005654 GO:0006281 GO:0016043 GO:0000781 GO:0006260 GO:0000794 GO:0003677 GO:0065007
AC209744.3_FG001	3	130287230	130288170	84	0	40	0	6.34	P	Adenine nucleotide alpha hydrolases-like superfamily protein		GO:0005794 GO:0010167 GO:0015706 GO:0005773 GO:0016301 GO:0009889 GO:0016043 GO:0050794 GO:0006826 GO:0006351 GO:0005886 GO:0010106 GO:0002238 GO:0009507
AC211910.4_FG005	1	253837561	253838043	2	41	42	51	-3.87				GO:0005488 GO:0044237
AC216731.3_FG002	5	201925736	201928335	52	0	15	2	5.66	P	Cation/H(+) antiporter 1		GO:0003824 GO:1902600 GO:0006885 GO:0016021 GO:0009987 GO:0006813 GO:0035725 GO:0005886 GO:0015385 GO:0005768
AC217374.3_FG001	1	297546780	297547160	92	1	34	1	5.47	P			GO:0005488 GO:0044237
AC217910.3_FG004	1	217332160	217332942	41	4	4	2	3				GO:0005737 GO:0016787 GO:0016021 GO:0044237 GO:0016740 GO:0005488
AC233881.1_FG006	5	200296333	200297095	665	15	332	7	5.31	P	expansin B2 (ATEXPB2)		GO:0009664 GO:0030246 GO:0005829 GO:0019953 GO:0016798 GO:0005576 GO:0048646 GO:0009505 GO:0009506
AC233959.1_FG006	5	80528351	80529334	1098	28	589	16	5.18	P			GO:0016787 GO:0005819 GO:0044237 GO:0005516 GO:0005886 GO:0005874
GRMZM2G000122	3	209418903	209419898	97	2	45	2	4.96				GO:0006468 GO:0005964 GO:0031124 GO:0031323 GO:0000166 GO:0044248 GO:0004674 GO:0005978 GO:0006366 GO:0034660 GO:0051641
GRMZM2G003838	3	205178929	205180093	50	0	1	0	5.61	P	pectin methylesterase inhibitor		GO:0005737 GO:0006139 GO:0046910 GO:0019222 GO:0044260 GO:0005618 GO:0030599 GO:0044249 GO:0010467 GO:0043086
GRMZM2G003917	10	124780181	124781201	133	7	36	5	4	P	Fasciclin-like arabinogalactan protein 7		GO:0005737 GO:0009834 GO:0016021 GO:0030247 GO:0003824 GO:0008152 GO:0005886 GO:0050896 GO:0031225
GRMZM2G004354	8	169439233	169439687	37	3	9	1	3.18	P	Defensin and Defensin-like DEFL family expressed (DEFL4)		GO:0032501 GO:0009607 GO:0016311 GO:0002768 GO:0006464 GO:0006952 GO:0005576 GO:0005488 GO:0048519 GO:0008200 GO:0048522
GRMZM2G004408	2	169429655	169431585	142	10	69	4	3.63	P	CRIB domain-containing protein RIC1		GO:0005737 GO:0007010 GO:0050794 GO:0004672 GO:0048518 GO:0051234 GO:0007275
GRMZM2G004593	3	30565956	30571432	3	128	100	98	-5.08		Phosphoglycerate mutase family protein;phosphatidylinositol 3- and 4-kinase family protein expressed		GO:0016787 GO:0044262 GO:0044260 GO:0050896 GO:0005739 GO:0006096 GO:0090304 GO:0044249 GO:0016740 GO:0065007 GO:0006066 GO:0004619 GO:0005634 GO:0009507
GRMZM2G004908	4	137620392	137623765	38	304	326	287	-3.03		TRAF-like family protein		GO:0032502 GO:0016787 GO:0002376 GO:0016021 GO:0000151 GO:0005654 GO:0016567 GO:0043130 GO:0007165 GO:0005886 GO:0004842 GO:0009507
GRMZM2G004927	3	228806966	228808514	308	14	227	7	4.3	P	Pectin lyase-like superfamily protein		GO:0005737 GO:0042545 GO:0000003 GO:0010383 GO:0048869 GO:0045330 GO:0009813 GO:0030599 GO:0009505 GO:0030048 GO:0005576 GO:0016572 GO:0045490 GO:0007275 GO:0044724
GRMZM2G005643	6	157563274	157564427	2040	81	931	48	4.57	P	expansin B2 (ATEXPB2)		GO:0009664 GO:0048856 GO:0030247 GO:0019953 GO:0044237 GO:0005576 GO:0004553
GRMZM2G005798	9	89530371	89532175	158	3	149	2	5.25	P	O-Glycosyl hydrolases family 17 protein (A6)		GO:0048046 GO:0046658 GO:0009793 GO:0009277 GO:0051567 GO:0009651 GO:0008356 GO:0009736 GO:0010584 GO:0005773 GO:0006346 GO:0009926 GO:0016246 GO:0008361 GO:0010015 GO:0009409 GO:0031048 GO:0009505 GO:0009506 GO:0005975 GO:0010075 GO:0009817 GO:0042973
GRMZM2G007708	6	157544245	157544990	7199	310	2945	225	4.47		expansin B2 (ATEXPB2)		GO:0009664 GO:0030247 GO:0019953 GO:0005576 GO:0008152 GO:0004553 GO:0009653
GRMZM2G008196	6	112078107	112079388	173	7	50	13	4.38	P	Protein EXORDIUM		GO:0005794 GO:0009741 GO:0051287 GO:0005829 GO:0016020 GO:0044237 GO:0005576 GO:0004616 GO:0080167 GO:0097305 GO:0009505 GO:0009506 GO:0009507
GRMZM2G010474	2	6571737	6573498	168	15	51	27	3.33	P			GO:0022403 GO:0007126 GO:0000166 GO:0051276 GO:0005789 GO:0006812 GO:0016021 GO:0031145 GO:0019829 GO:0051253 GO:0006950 GO:0006357 GO:0045893 GO:0031327 GO:0003678 GO:0007059 GO:0070591 GO:0046872 GO:0010558 GO:0032541
GRMZM2G012328	2	42991909	42994023	389	5	193	6	5.96	P	Pectinesterase 5	Metabolic pathways;Pentose and glucuronate interconversions	GO:0005737 GO:0009827 GO:0046910 GO:0019222 GO:0010383 GO:0009860 GO:0009624 GO:0030599 GO:0009505 GO:0048046 GO:0010054 GO:0045330 GO:0045490 GO:0043086
GRMZM2G012611	1	241318043	241329110	336	36	329	25	3.12	P			GO:0032502 GO:0044267 GO:0016192 GO:0016772 GO:0016021 GO:0016043 GO:0005622 GO:0065007 GO:0051641
GRMZM2G013915	2	156503630	156510837	5	51	43	23	-3.18	P	zinc knuckle (CCHC-type) family protein		GO:0005737 GO:0016070 GO:0005634 GO:0016740 GO:0008270 GO:0003677 GO:0016021
GRMZM2G018148	4	240590156	240592210	44	0	11	0	5.43	P	OPT oligopeptide transporter protein		GO:0006857 GO:0048316 GO:0005887 GO:0009987 GO:0009624 GO:0005774 GO:0003824 GO:0055072 GO:0015198 GO:0010039 GO:0010043 GO:0015688 GO:0034755 GO:0051980
GRMZM2G022651	3	4894121	4896155	5	48	58	53	-3.1				GO:0015630 GO:0005783 GO:0005634 GO:0044237 GO:0016740 GO:0005488 GO:0000777
GRMZM2G022863	2	225842477	225843100	1034	94	242	119	3.38	P			GO:0016787 GO:0009607 GO:0006081 GO:0044260 GO:0009966 GO:0006952 GO:0005576 GO:0007338 GO:0044282 GO:0007190 GO:0009507 GO:0010468 GO:0051641
GRMZM2G024495	2	144119083	144120612	200	1	58	0	6.58	P	Alpha carbonic anhydrase 1 chloroplastic	Nitrogen metabolism	GO:0009535 GO:0009570 GO:0006730 GO:0048731 GO:0065007 GO:0008270 GO:0005886 GO:0010037 GO:0004089
GRMZM2G024680	1	244829629	244830954	114	10	62	27	3.32	P	jasmonate-zim-domain protein (JAZ1, TIFY10A)		GO:0009733 GO:0043565 GO:0009738 GO:0042538 GO:0010363 GO:0006355 GO:0009863 GO:0009620 GO:0005634 GO:0006612 GO:0009867 GO:0009611 GO:0009723 GO:0009695 GO:0008270 GO:0009414 GO:0043069
GRMZM2G024887	10	132724522	132726075	1039	60	324	32	4.03	P	GATA type zinc finger transcription factor family protein		GO:0015629 GO:0030427 GO:0061025 GO:0008270 GO:0060048 GO:0030018 GO:0031433 GO:0035995 GO:0007517 GO:0005634 GO:0003300 GO:0002026 GO:0055003 GO:0006874 GO:0051017 GO:0051015 GO:0050794 GO:0003824 GO:0045214 GO:0005938 GO:0005886 GO:0001974
GRMZM2G025175	8	111230050	111231046	4646	539	1888	442	3.04	P	POEI21 - Pollen Ole e I allergen and extensin family protein precursor expressed		GO:0016787 GO:0007030 GO:0005615 GO:0016021 GO:0006816 GO:0050794 GO:0019344 GO:0023052 GO:0048731 GO:0009651 GO:0005622
GRMZM2G026098	1	249959592	249960418	2115	230	848	186	3.13	P			GO:0006996 GO:0006139 GO:0051234 GO:0019538 GO:0009058 GO:0019058 GO:0065007 GO:0003723 GO:0005886 GO:0008047 GO:0051641 GO:0009505 GO:0005576
GRMZM2G026135	1	249758813	249760422	1620	159	824	123	3.27	P	Gibberellin-regulated family protein (GASR3)		GO:0050896 GO:0009987 GO:0005576 GO:0003723 GO:0008152 GO:0005886 GO:0009505 GO:0008047
GRMZM2G026568	2	122429137	122431230	131	1	61	0	5.98	P			GO:0005216 GO:0009987 GO:0006950 GO:0006810 GO:0008324
GRMZM2G027187	4	239302476	239305460	251	20	137	20	3.52	P	Microtubule associated protein (MAP65/ASE1) family		GO:0007631 GO:0031116 GO:0010005 GO:0052096 GO:0005815 GO:0005876 GO:0007020 GO:0009536 GO:0051322 GO:0005773 GO:0048869 GO:0005634 GO:0000280 GO:0009574 GO:0005739 GO:0000922 GO:0032501 GO:0000279 GO:0008017 GO:0072686 GO:0008152 GO:0005886 GO:0051233 GO:0043234 GO:0000911 GO:0009524 GO:0001578 GO:0009624 GO:0016758
GRMZM2G029249	7	40328885	40331026	705	37	531	33	4.15	P	P21-Rho-binding family protein (RIC7)		GO:0005737 GO:0050794 GO:0008152 GO:0004672 GO:0048518 GO:0051234 GO:0007275 GO:0003008
GRMZM2G029558	8	3482427	3483370	160	9	39	11	3.94	P			GO:0000166 GO:0006812 GO:0016021 GO:0005789 GO:0019829 GO:0008152 GO:0048518 GO:0046872 GO:0042981
GRMZM2G030531	1	203482243	203484003	63	0	19	1	5.93	P	expansin B2 (ATEXPB3)		GO:0016787 GO:0009664 GO:0005618 GO:0016020 GO:0016740 GO:0005576 GO:0048646
GRMZM2G034846	1	98984653	98985598	224	7	81	4	4.75	P	invertase/pectin methylesterase inhibitor family protein putative expressed		GO:0009595 GO:0015824 GO:0000165 GO:0006612 GO:0002831 GO:0031348 GO:0009697 GO:0042742 GO:0009651 GO:0004857 GO:0043086 GO:0005737 GO:0010310 GO:0005618 GO:0009862 GO:0009867 GO:0006096 GO:0046686 GO:0030599 GO:0050832 GO:0006833 GO:0006972 GO:0009266 GO:0010200 GO:0007030 GO:0010363 GO:0043900 GO:0009743
GRMZM2G034924	4	186369140	186370469	2744	177	998	132	3.88	P	pollen allergen putative expressed		GO:0006310 GO:0016787 GO:0005727 GO:0003677
GRMZM2G037690	1	116462905	116466696	76	4	26	7	3.88	P	Glycosyl hydrolase family 38 protein	Other glycan degradation	GO:0005794 GO:0015923 GO:0050896 GO:0030246 GO:0044237 GO:0005774 GO:0006013 GO:0043170
GRMZM2G037912	1	13863133	13865361	77	0	59	0	6.22	P	vesicle-associated membrane protein 726 (ATVAMP726, VAMP726)		GO:0030670 GO:0006598 GO:0005794 GO:0000087 GO:0072661 GO:0008333 GO:0005789 GO:0005484 GO:0009651 GO:0031201 GO:0009737 GO:0016021 GO:0009963 GO:0016740 GO:0048645 GO:2000762 GO:0048451 GO:0000331 GO:0048453 GO:0006906 GO:0048193 GO:0030141 GO:0006623 GO:0030658 GO:0010118 GO:0005886 GO:0009504 GO:0009506 GO:0009507 GO:0007033 GO:0007030 GO:0010363 GO:1900378 GO:0044351 GO:0031902 GO:0005765 GO:…
GRMZM2G038001	5	98488964	98492602	222	22	97	9	3.21	P	glycerophosphoryl diester phosphodiesterase family protein putative expressed		GO:0048046 GO:0046658 GO:0005488 GO:0045010 GO:0005982 GO:0010442 GO:0016740 GO:0048513 GO:0006071 GO:0009507 GO:0048646 GO:0016126 GO:0052541 GO:0048767 GO:0052546 GO:0046165 GO:0000272 GO:0007155 GO:0009505 GO:0009506 GO:0044724 GO:0042545 GO:0009832 GO:0008889 GO:0009913 GO:0050896 GO:0010075 GO:0016051 GO:0010090 GO:0009932 GO:2000026
GRMZM2G040088	8	172315227	172316430	163	11	89	6	3.71				GO:0005488 GO:0044237
GRMZM2G040932	2	225993485	225994093	2501	272	449	144	3.13	P			GO:0016787 GO:0009607 GO:0006081 GO:0044260 GO:0009966 GO:0006952 GO:0005576 GO:0007338 GO:0044282 GO:0007190 GO:0009507 GO:0010468 GO:0051641
GRMZM2G041448	3	143120612	143121112	812	17	274	16	5.43				GO:0005488 GO:0044237
GRMZM2G041493	2	118086762	118087924	2633	216	773	93	3.53	P			GO:0016740 GO:0005488 GO:0044237
GRMZM2G042421	3	217635215	217636142	244	25	108	8	3.17	P	Late embryogenesis abundant protein		GO:0048046 GO:0009987 GO:0009737 GO:0016021 GO:0010286 GO:0009611 GO:0000166 GO:0050832 GO:0009409 GO:0009793 GO:0008152 GO:0004672 GO:0009269 GO:0005886 GO:0009644 GO:0005829 GO:0009507
GRMZM2G042895	10	76600002	76602213	213	24	520	126	3.03				GO:0005737 GO:0006355 GO:0003700 GO:0030154 GO:0005654 GO:0003824 GO:0048513 GO:0003677 GO:0046983 GO:0009653
GRMZM2G043069	8	120946357	120948469	54	0	24	3	5.71	P	Protein kinase superfamily protein		GO:0005856 GO:0005737 GO:0044710 GO:0005730 GO:0009816 GO:0016021 GO:0007275 GO:0050832 GO:0004674 GO:0007165 GO:0005886 GO:0046777 GO:0005524 GO:0012505
GRMZM2G043415	1	209836298	209838478	46	4	4	8	3.17	P	pectinesterase		GO:0005737 GO:0009827 GO:0046910 GO:0019222 GO:0005618 GO:0010383 GO:0009860 GO:0030599 GO:0007275 GO:0045330 GO:0045490 GO:0043086
GRMZM2G044100	10	144383214	144386006	429	37	181	32	3.43	P			GO:0032501 GO:0006355 GO:0003824 GO:0023052 GO:0003676 GO:0005886 GO:0048518 GO:0005885
GRMZM2G044269	1	221838374	221842104	329	21	172	28	3.84	P	cellulose synthase-like family D expressed (CSLD3)		GO:0005783 GO:0005886 GO:0030244 GO:0016926 GO:0009414 GO:0009651 GO:0030173 GO:0010583 GO:0010089 GO:0009965 GO:0010400 GO:0016760 GO:0016761 GO:0009846 GO:0048646 GO:0048767 GO:0010228 GO:0009409 GO:0009507 GO:0000911 GO:0009833 GO:0009834 GO:0050665 GO:0009913 GO:0005802 GO:0045492 GO:0005768 GO:0010413
GRMZM2G045030	2	229868116	229868601	485	3	281	6	6.86		Cysteine-rich protein with paired CXXXC motifs		GO:0048731 GO:0005488 GO:0016043
GRMZM2G045064	2	229865520	229866000	84	0	142	1	6.34		Cysteine-rich protein with paired CXXXC motifs		GO:0048731 GO:0016043
GRMZM2G045106	2	229860324	229860809	407	18	310	12	4.36		Cysteine-rich protein with paired CXXXC motifs		GO:0048731 GO:0005488 GO:0016043
GRMZM2G045278	8	167570398	167571619	157	5	72	11	4.65	P	Adenine nucleotide alpha hydrolases-like superfamily protein		GO:0010167 GO:0000279 GO:0015706 GO:0005773 GO:0005829 GO:0016301 GO:0010106 GO:0002238 GO:0012505 GO:0009507 GO:0005886 GO:0009409 GO:0007190 GO:0016925 GO:0009506 GO:0042157
GRMZM2G045645	7	44152868	44154649	330	26	153	28	3.55	P	Clathrin light chain protein		GO:0032502 GO:0030132 GO:0022414 GO:0006886 GO:0032050 GO:0016798 GO:0000139 GO:0006355 GO:0072583 GO:0030130 GO:0048518 GO:0048519 GO:0005198 GO:0050896
GRMZM2G046609	3	139700641	139704086	70	4	52	8	3.76	P	S-adenosyl-L-methionine-dependent methyltransferases superfamily protein		GO:0032259 GO:0005975 GO:0044260 GO:0008757 GO:0016021 GO:0005802 GO:0005739 GO:0000139 GO:0009058 GO:0006807 GO:0044281 GO:0005789 GO:0005768 GO:0007275 GO:0009506
GRMZM2G047699	8	117807467	117808251	724	3	296	4	7.44	P	Defensin and Defensin-like DEFL family expressed (DEFL4)		GO:0016070 GO:0009607 GO:0007399 GO:0030154 GO:0050794 GO:0006952 GO:0043412 GO:0048513 GO:0023052 GO:0048519 GO:0051179
GRMZM2G048172	7	4805833	4808169	44	0	14	0	5.43	P			GO:0005737 GO:0016310 GO:0005634 GO:0016301 GO:0007160 GO:0019013 GO:0005488
GRMZM2G049238	4	240592623	240595424	80	2	31	0	4.69				GO:0006857 GO:0048316 GO:0005887 GO:0009987 GO:0009624 GO:0005774 GO:0003824 GO:0055072 GO:0015198 GO:0010039 GO:0010043 GO:0015688 GO:0034755 GO:0051980
GRMZM2G050364	8	78644679	78646585	202	2	101	3	6.01	P	aspartyl protease family protein putative expressed		GO:0010310 GO:0007010 GO:0005783 GO:0016709 GO:0010337 GO:0005886 GO:0009627 GO:0048046 GO:0032501 GO:0004190 GO:0030163 GO:0080167 GO:0006508 GO:0010019 GO:0009505 GO:0009507
GRMZM2G050727	6	116137419	116138764	77	2	21	1	4.63	P	tetraspanin8 (TET8)		GO:0009956 GO:0044238 GO:0010305 GO:0016021 GO:0031323 GO:0003824 GO:0009933 GO:0048513 GO:0010015 GO:0005886 GO:0005768 GO:0048646 GO:0005488
GRMZM2G052006	6	169000582	169002394	365	4	177	3	6.13	P	aspartyl protease family protein putative expressed		GO:0016070 GO:0010310 GO:0005783 GO:0048869 GO:0016020 GO:0009627 GO:0009505 GO:0048046 GO:0010467 GO:0004190 GO:0010337 GO:0080167 GO:0010019 GO:0048731 GO:0006508 GO:0009507
GRMZM2G053387	5	1761261	1762309	64	0	6	0	5.96	P	Cys-rich domain containing protein; PLANT CADMIUM RESISTANCE 2 (PCR2)		GO:0008285 GO:0008152 GO:0005773 GO:0048235 GO:0016740 GO:0005488 GO:0005887 GO:0042221 GO:0006979
GRMZM2G053588	9	28392287	28396846	14	142	146	157	-3.32		polymerase II transcription-mediator3		GO:0005737 GO:0051252 GO:0000166 GO:0001104 GO:0048513 GO:0006351 GO:0016757 GO:0016592 GO:0000105 GO:0046872 GO:0010468
GRMZM2G053637	7	27820471	27822032	51	1	33	0	4.63	P	Late embryogenesis abundant protein group 2		GO:0009620 GO:0016021 GO:0005886 GO:0044237 GO:0000166 GO:0006952 GO:0009269 GO:0004672 GO:0046686 GO:0009507
GRMZM2G053749	4	45460668	45461376	5171	211	1392	90	4.54	P	expansin B2 (ATEXPB2)		GO:0009664 GO:0010556 GO:0031326 GO:0050896 GO:0004553 GO:0030247 GO:0019953 GO:0005576 GO:0051171 GO:0006366 GO:0007275
GRMZM2G056221	8	22941113	22942075	391	0	80	2	8.55	P	Rapid ALkalinization Factor RALF family protein (RALFL19)		GO:0005179 GO:0019722 GO:0044237 GO:0005622 GO:0048046 GO:0004871 GO:0009506
GRMZM2G057778	1	6012083	6030032	25	202	204	127	-3.03	P	Callose synthase 3		GO:0003843 GO:0000003 GO:0048869 GO:0016021 GO:0000148 GO:0016043 GO:0006075 GO:0065007 GO:0005488 GO:0009653
GRMZM2G058024	8	169193621	169197751	188	21	9	6	3.04		2-oxoglutarate/Fe(II)-dependent dioxygenase		GO:0009830 GO:0005794 GO:0010260 GO:0005783 GO:0010162 GO:0009718 GO:0005634 GO:0051555 GO:0005777 GO:0009686 GO:0010583 GO:0045431 GO:0009845 GO:0010023 GO:0080167 GO:0009407 GO:0009740 GO:0005506 GO:0055114 GO:0050589
GRMZM2G060400	2	183985910	183988519	194	3	63	2	5.54	P	pectinesterase putative expressed		GO:0005737 GO:0009827 GO:0046910 GO:0019222 GO:0010383 GO:0009860 GO:0009624 GO:0030599 GO:0043086 GO:0048046 GO:0045330 GO:0007275 GO:0045490 GO:0009505 GO:0090406
GRMZM2G060937	4	45377610	45378387	2548	134	1092	55	4.17	P	expansin B2 (ATEXPB2)		GO:0009664 GO:0044238 GO:0050896 GO:0030247 GO:0019953 GO:0050794 GO:0034641 GO:0005576 GO:0034645 GO:0004553 GO:0007275
GRMZM2G061764	9	52961497	52964749	267	19	136	19	3.68	P	cellulose synthase-like D1 (ATCSLD1, CSLD1)		GO:0005783 GO:0010383 GO:0030244 GO:0009414 GO:0009651 GO:0030173 GO:0010583 GO:0009825 GO:0010116 GO:0009809 GO:0005618 GO:0009965 GO:0043481 GO:0010400 GO:0016760 GO:0016761 GO:0009846 GO:0009926 GO:0048646 GO:0048767 GO:0005886 GO:0009409 GO:0043255 GO:0009506 GO:0009507 GO:0000911 GO:0007030 GO:0009833 GO:0009834 GO:0009913 GO:0005802 GO:0009932 GO:0005768
GRMZM2G062996	1	69407933	69410069	115	12	54	9	3.09	P	Plant invertase/pectin methylesterase inhibitor superfamily		GO:0005737 GO:0009827 GO:0046910 GO:0019222 GO:0005618 GO:0010383 GO:0009860 GO:0030599 GO:0043086 GO:0045330 GO:0007275 GO:0045490 GO:0090406
GRMZM2G063435	9	152946828	152948794	886	44	566	22	4.23	P	Peroxidase superfamily protein	Metabolic pathways;Biosynthesis of secondary metabolites；Phenylpropanoid biosynthesis	GO:0015706 GO:0048046 GO:0042744 GO:0010106 GO:0009534 GO:0010167 GO:0009863 GO:0005739 GO:0098869 GO:0009506 GO:0071456 GO:0005794 GO:0048767 GO:0020037 GO:0070301 GO:0050832 GO:0002679 GO:0009505 GO:0055114 GO:0010200 GO:0009664 GO:0010363 GO:0009913 GO:0005829 GO:0004601
GRMZM2G064521	8	33294656	33297730	65	4	22	1	3.66		Late embryogenesis abundant protein (AtLEA5, SAG21)		GO:0005829 GO:0005739 GO:0006950 GO:0044237 GO:0003676 GO:0007154 GO:0008270
GRMZM2G066448	6	152370990	152373928	131	8	49	18	3.81	P	IQ calmodulin-binding motif domain containing protein expressed		GO:0016137 GO:0015630 GO:0044262 GO:0003824 GO:0050896 GO:0044249 GO:0016459 GO:0005938 GO:0005886 GO:0007275
GRMZM2G066675	6	99680859	99682666	44	3	33	2	3.43	P	polygalacturonase putative expressed		GO:0005737 GO:0005975 GO:0071555 GO:0005618 GO:0044237 GO:0004650 GO:0009791 GO:0003006 GO:0048513 GO:0005576 GO:0047911 GO:0009057 GO:0042991
GRMZM2G066950	2	231543358	231545402	134	4	97	1	4.69	P	invertase/pectin methylesterase inhibitor family protein putative expressed		GO:0005737 GO:0046910 GO:0050896 GO:0005634 GO:0044237 GO:0050794 GO:0071944 GO:0023052 GO:0030599 GO:0048731 GO:0043086
GRMZM2G070961	3	220786615	220789596	371	9	149	6	5.15	P	Protein kinase protein with adenine nucleotide alpha hydrolases-like domain		GO:0048440 GO:0016881 GO:0007165 GO:0005856 GO:0044710 GO:0005634 GO:0009860 GO:0004674 GO:0005524 GO:0009827 GO:0006468 GO:0030048 GO:0006950 GO:0012505 GO:0005886 GO:0035295 GO:0004842 GO:0009507 GO:0010092 GO:0010093 GO:0000151 GO:0016567 GO:0002238
GRMZM2G071327	2	19439865	19441123	761	65	284	49	3.46	P	actin depolymerizing factor 11 (ADF11)		GO:0051286 GO:0048046 GO:0042742 GO:0071519 GO:0005739 GO:0003779 GO:0046686 GO:0016363 GO:0060187 GO:0030479 GO:0032153 GO:0005884 GO:0005886 GO:0030041 GO:0030042 GO:0006979 GO:0009506 GO:0009507 GO:0010054 GO:0009744 GO:0009913 GO:0005829 GO:0009870
GRMZM2G073380	10	54016997	54020247	58	2	32	1	4.23	P	Diacylglycerol kinase 3	Metabolic pathways;Biosynthesis of secondary metabolites;Glycerolipid metabolism;Glycerophospholipid metabolism；Phosphatidylinositol signaling system	GO:0044238 GO:0031410 GO:0016021 GO:0005886 GO:0007205 GO:0000166 GO:0005654 GO:0045202 GO:0007166 GO:0016310 GO:0004143
GRMZM2G074356	1	287774498	287775845	80	2	33	9	4.69	P	transmembrane BAX inhibitor motif-containing protein putative expressed		GO:0044238 GO:0016021 GO:0016740 GO:0007165 GO:0044237
GRMZM2G074395	1	275649843	275651527	210	15	53	8	3.65	P	UDP-glucosyl transferase 73B5 (UGT73B5)		GO:0016131 GO:0052696 GO:0005789 GO:0009699 GO:0010583 GO:0009536 GO:0031090 GO:0016021 GO:0005739 GO:0080043 GO:0080046 GO:0080044 GO:0050403 GO:0009407 GO:0005886 GO:0010224 GO:0050502 GO:0051555 GO:0005829 GO:0047893 GO:0009723 GO:0005634
GRMZM2G075077	5	33997493	34000691	298	20	205	9	3.77	P			GO:0005737 GO:0044267 GO:0006812 GO:0016021 GO:0016740 GO:0005488
GRMZM2G075222	8	28128666	28129583	516	41	191	31	3.56	P	Pollen allergen and extensin family protein (POEI21)		GO:0016787 GO:0007030 GO:0005783 GO:0005634 GO:0006816 GO:0019344 GO:0065007 GO:0009651 GO:0016021 GO:0005615
GRMZM2G075588	9	153681862	153684408	111	0	79	1	6.74	P	vesicle-associated membrane protein putative expressed		GO:0030670 GO:0006598 GO:0005794 GO:0000087 GO:0072661 GO:0008333 GO:0005789 GO:0005484 GO:0009651 GO:0031201 GO:0009737 GO:0016021 GO:0009963 GO:0016740 GO:0048645 GO:2000762 GO:0048451 GO:0000331 GO:0048453 GO:0006906 GO:0048193 GO:0030141 GO:0006623 GO:0030658 GO:0010118 GO:0005886 GO:0009504 GO:0009506 GO:0009507 GO:0007033 GO:0007030 GO:0010363 GO:1900378 GO:0044351 GO:0031902 GO:0005765 GO:…
GRMZM2G077828	5	16856621	16859292	71	7	18	6	3.1	P	cyclic nucleotide gated channel 7 (ATCNGC7, CNGC7)		GO:0005737 GO:0008324 GO:0016021 GO:0031090 GO:0050896 GO:0005216 GO:0009987 GO:0055085 GO:0003824 GO:0012505 GO:0005886 GO:0006811 GO:0005634
GRMZM2G078804	7	24834018	24835345	3043	318	1626	186	3.19	P	Plant invertase/pectin methylesterase inhibitor superfamily protein		GO:0005737 GO:0032501 GO:0019222 GO:0005618 GO:0009987 GO:0030599 GO:0030001 GO:0005488 GO:0004857 GO:0043086
GRMZM2G078886	7	24809925	24810872	429	5	287	2	6.1	P	pectinesterase inhibitor domain containing protein expressed		GO:0005737 GO:0009607 GO:0019222 GO:0005618 GO:0009987 GO:0030599 GO:0006950 GO:0004857 GO:0043086 GO:0051704
GRMZM2G079574	3	232127856	232128662	1082	71	400	28	3.84	P	pollen allergen putative expressed		GO:0009664 GO:0048731 GO:0019222 GO:0044238 GO:0030247 GO:0019953 GO:0043170 GO:0044249 GO:0005576 GO:0004553 GO:0042221 GO:0035556 GO:0010646
GRMZM2G079661	6	162217833	162219489	393	12	147	1	4.86	P	invertase/pectin methylesterase inhibitor family protein putative expressed		GO:0005737 GO:0046910 GO:0000003 GO:0019222 GO:0005618 GO:0030599 GO:0007275 GO:0043086 GO:0000902
GRMZM2G080907	9	78188342	78190469	2166	191	1052	77	3.43	P	FAD-binding Berberine family protein;reticuline oxidase-like protein precursor putative expressed		GO:0008762 GO:0005783 GO:0048046 GO:0009793 GO:0015706 GO:0010583 GO:0010167 GO:0045010 GO:0005773 GO:0016021 GO:0009505 GO:0009506 GO:0071456 GO:0048765 GO:0031966 GO:0002679 GO:0050660 GO:0009407 GO:0005886 GO:0006979 GO:0055114 GO:0009055 GO:0010200 GO:0010090 GO:0050468 GO:0005829 GO:0010197 GO:0009743 GO:0005634
GRMZM2G082517	5	126810483	126811529	4359	507	2053	448	3.03	P			GO:0009827 GO:0044238 GO:0040007 GO:0030247 GO:0050794 GO:0046658 GO:0009651
GRMZM2G083248	1	243274177	243277640	72	3	10	8	4.12	P	sucrose transporter		GO:0016137 GO:0015768 GO:0009611 GO:0009695 GO:0007165 GO:0034219 GO:0042949 GO:0008506 GO:0005773 GO:0005985 GO:0005654 GO:0042948 GO:0010467 GO:0009846 GO:0009909 GO:0005794 GO:0015770 GO:0005887 GO:0090406 GO:0009506 GO:0010200 GO:0009624 GO:0016740 GO:0042950 GO:0042951 GO:0005364
GRMZM2G086502	7	29541012	29542841	46	0	8	0	5.49	P	myosin putative expressed		GO:0005737 GO:0016787 GO:0016021 GO:0006730 GO:0005635 GO:0006412 GO:0001510 GO:0006400 GO:0006914
GRMZM2G087619	3	175143033	175168205	15	123	179	146	-3.02				GO:0005737 GO:0006139 GO:0015630 GO:0000279 GO:0051276 GO:0016787 GO:0005634 GO:0016740 GO:0022402 GO:0048285 GO:0007059 GO:0050789 GO:0005488
GRMZM2G088208	2	185673128	185674847	42	0	17	0	5.36	P	bifunctional monodehydroascorbate reductase and carbonic anhydrasenectarin-3 (ACA7, ATACA7)	Metabolic pathways;Nitrogen metabolism	GO:0009536 GO:0006730 GO:0065007 GO:0008270 GO:0005886 GO:0048731 GO:0004089
GRMZM2G088245	1	232371174	232374145	63	6	23	2	3.13	P	AGC (cAMP-dependent cGMP-dependent and protein kinase C) kinase family protein		GO:0001411 GO:0015629 GO:0036244 GO:0051285 GO:0043407 GO:0036180 GO:0035690 GO:0005934 GO:0070593 GO:0035317 GO:1900433 GO:0072686 GO:0031435 GO:0030950 GO:0005813 GO:0071470 GO:0031579 GO:0004674 GO:0048800 GO:0070688 GO:0005524 GO:0060187 GO:0043687 GO:0060237 GO:0030428 GO:1900442 GO:0022416 GO:0012505 GO:0005886 GO:0005935 GO:0060100 GO:0036170 GO:0000910 GO:0010590 GO:0009524 GO:0000131 GO:…
GRMZM2G088371	3	14976988	14977593	495	34	212	27	3.76	P			GO:0005179 GO:0048046 GO:0044237 GO:0004871
GRMZM2G089409	5	81133	82138	176	0	68	2	7.4	P			GO:0005488 GO:0044237
GRMZM2G089699	9	152409062	152410472	2551	254	1167	128	3.26	P	expansin B2 (ATEXPB2)		GO:0009664 GO:0005618 GO:0019953 GO:0016798 GO:0016740 GO:0005576 GO:0048646
GRMZM2G092338	10	147283364	147284524	871	102	222	83	3.02	P	Early nodulin-like protein 1		GO:0006084 GO:0000911 GO:0010075 GO:0000279 GO:0051322 GO:0005773 GO:0006810 GO:0046658 GO:0006950 GO:0048513 GO:2000026 GO:0012505 GO:0009055 GO:0016572 GO:0005507 GO:0009628 GO:0051225 GO:0009506 GO:0032578
GRMZM2G093772	9	6006724	6008888	96	1	46	1	5.53	P	endonuclease/exonuclease/phosphatase family domain containing protein		GO:0090305 GO:0009944 GO:0052659 GO:0010067 GO:0010588 GO:0009738 GO:0005654 GO:0046856 GO:0046855 GO:0004445 GO:0048519 GO:0046854 GO:0048646 GO:0048765 GO:0032440 GO:0010014 GO:0032957 GO:0052658 GO:0048016 GO:0043234 GO:0004518 GO:0010305 GO:0009913 GO:0005740 GO:0009932 GO:0048439 GO:0009855
GRMZM2G094563	5	185618639	185620547	80	8	63	14	3.1	P	Lung seven transmembrane receptor family protein		GO:0005794 GO:0005783 GO:0016021 GO:0044237 GO:0016740 GO:0048513 GO:0002237 GO:0010015 GO:0046872 GO:0005768
GRMZM2G094811	6	99520235	99522243	1976	47	964	13	5.3	P	polygalacturonase putative expressed	Metabolic pathways;Pentose and glucuronate interconversions	GO:0005737 GO:0005975 GO:0071555 GO:0005618 GO:0044237 GO:0004650 GO:0009791 GO:0003006 GO:0048513 GO:0005576 GO:0047911 GO:0009057 GO:0042991
GRMZM2G095895	6	119383008	119383728	3410	92	1546	53	5.13	P			GO:0016787 GO:0005840 GO:0005634 GO:0005739 GO:0016740 GO:0044237 GO:0000444 GO:0009654 GO:0016021 GO:0005488
GRMZM2G096435	8	72608489	72609397	1095	102	234	283	3.34		oleosin		GO:0016829 GO:0000003 GO:0016021 GO:0009987 GO:0044444 GO:0008152 GO:0016740 GO:0012511 GO:0019915 GO:0050896 GO:0043231
GRMZM2G097122	2	200140261	200141322	340	29	163	24	3.44	P	actin-depolymerizing factor putative expressed		GO:0010054 GO:0048046 GO:0009744 GO:0016363 GO:0009913 GO:0030479 GO:0005829 GO:0005739 GO:0051014 GO:0003779 GO:0046686 GO:0009870 GO:0042742 GO:0009507 GO:0005886 GO:0030041 GO:0030042 GO:0006979 GO:0009506 GO:0005884
GRMZM2G099827	5	73181522	73184335	155	14	45	2	3.31	P	Microtubule associated protein (MAP65/ASE1) family		GO:0007631 GO:0031116 GO:0010005 GO:0052096 GO:0034645 GO:0000022 GO:0051225 GO:0005876 GO:0007020 GO:0009536 GO:0051322 GO:0005773 GO:0005634 GO:0009574 GO:0005739 GO:0000922 GO:0000279 GO:0008017 GO:0003824 GO:0072686 GO:0005886 GO:0051233 GO:0043234 GO:0000911 GO:0009524 GO:0019538 GO:0001578 GO:0009624
GRMZM2G101069	2	45619967	45622893	978	35	590	21	4.7	P	glutamate decarboxylase 4 (GAD4)	Metabolic pathways;Biosynthesis of secondary metabolites;Butanoate metabolism；Alanine, aspartate and glutamate metabolism；beta-Alanine metabolism ；Taurine and hypotaurine metabolism	GO:2000762 GO:0010167 GO:0048767 GO:0010363 GO:1900378 GO:0031410 GO:0005829 GO:0009963 GO:0004351 GO:0034641 GO:0009536 GO:0030170 GO:0010359 GO:0006536 GO:0046686 GO:0005634 GO:0016021 GO:0009506 GO:0045202
GRMZM2G103599	1	9486103	9495072	23	284	549	481	-3.64		(ATSRA1, KLK, PIR, PIR121, PIRP, SRA1) transcription activators	RNA transport	GO:0007010 GO:0048869 GO:0016021 GO:0008234 GO:0048367 GO:0016740 GO:0048513 GO:0006351 GO:0019028 GO:0004386 GO:0001172 GO:0050789
GRMZM2G105219	7	147563974	147566854	37	3	16	9	3.18	P	Cation/H(+) antiporter 1		GO:0009860 GO:0005789 GO:0010351 GO:0009827 GO:0010583 GO:0015992 GO:0006885 GO:0016021 GO:0005770 GO:0010183 GO:0031969 GO:0006813 GO:0015299 GO:0006623 GO:0034220 GO:0030007 GO:0009407 GO:0005886 GO:0030104 GO:0035295 GO:0010260 GO:0003824 GO:0009627
GRMZM2G106136	4	30662047	30663849	278	26	93	52	3.3	P			GO:0000166 GO:0006812 GO:0016021 GO:0044237 GO:0005789 GO:0019829 GO:0046872 GO:0032541
GRMZM2G107162	1	182930813	182932054	114	0	14	0	6.78	P			GO:0005737 GO:0006139 GO:0016021 GO:0009058 GO:0016740 GO:0043234 GO:0005102 GO:0005694 GO:0005634
GRMZM2G108777	2	117580482	117581043	313	20	180	16	3.84	P	mucin-associated surface protein putative expressed		GO:0005737 GO:0046907 GO:0002768 GO:0006796 GO:0005886 GO:0008168 GO:0008610
GRMZM2G109291	5	126733036	126734528	63	0	22	0	5.93	P	Fasciclin-like arabinogalactan protein 3		GO:0005737 GO:0016787 GO:0016021 GO:0009987 GO:0030247 GO:0008152 GO:0005886 GO:0050896 GO:0031225
GRMZM2G109973	5	200224630	200225916	683	6	395	0	6.54	P	expansin precursor putative expressed		GO:0005794 GO:0009664 GO:0005829 GO:0016798 GO:0019953 GO:0016740 GO:0005576 GO:0009506 GO:0009505 GO:0048646
GRMZM2G110025	5	200244246	200245597	787	7	404	1	6.56	P	expansin precursor putative expressed		GO:0009664 GO:0005829 GO:0019953 GO:0016798 GO:0016740 GO:0005576 GO:0048646 GO:0009505 GO:0009506
GRMZM2G112579	3	84917331	84919242	494	30	407	15	3.93	P	Pectin lyase-like superfamily protein	Metabolic pathways;Pentose and glucuronate interconversions	GO:0005737 GO:0005975 GO:0009835 GO:0005618 GO:0044237 GO:0004650 GO:0009791 GO:0071555 GO:0048513 GO:0005576 GO:0047911 GO:0009057 GO:0042991
GRMZM2G112984	7	174582127	174584270	212	1	80	1	6.67		invertase/pectin methylesterase inhibitor family protein putative expressed	Metabolic pathways;Pentose and glucuronate interconversions	GO:0005737 GO:0009827 GO:0046910 GO:0009624 GO:0010363 GO:1900378 GO:0010383 GO:0009963 GO:0030599 GO:0043086 GO:0048046 GO:0010054 GO:0045330 GO:0009505 GO:0045490 GO:2000762 GO:0090406 GO:0000003
GRMZM2G113818	10	135350180	135352459	56	0	29	0	5.77		purine permease putative expressed		GO:0005345 GO:0008152 GO:0005338 GO:0006863 GO:0015860 GO:0009624 GO:0010184 GO:0016740 GO:0005887 GO:0009987 GO:0009507
GRMZM2G115730	1	201519254	201520692	363	39	99	24	3.12	P		Endocytosis	GO:0005794 GO:0016192 GO:0005634 GO:0005543 GO:0016043 GO:0003824 GO:0005886 GO:0030136 GO:0005768 GO:0051641
GRMZM2G119823	10	105635764	105638288	158	12	232	42	3.55		basic helix-loop-helix (bHLH) DNA-binding superfamily protein		GO:0043234 GO:0005737 GO:0003824 GO:0030154 GO:0030529 GO:0005654 GO:0006355 GO:0048513 GO:0000785 GO:0003676 GO:0046983 GO:0009653
GRMZM2G120246	4	99629173	99643310	43	0	31	0	5.39	P	protein phosphatase 2C 33		GO:0010167 GO:0042538 GO:0015706 GO:0006470 GO:0005634 GO:0004722 GO:0005739 GO:0030244 GO:0010106 GO:0010193 GO:0007165 GO:0009414 GO:0005886 GO:0009409 GO:0009737 GO:0009507 GO:0043687 GO:0005488
GRMZM2G121256	2	32549059	32550229	148	0	58	11	7.15	P	GPI-anchored protein putative expressed		GO:0016310 GO:0016021 GO:0016301 GO:0009567 GO:0007165 GO:0004871 GO:0005886 GO:0010483 GO:0035295 GO:0006413 GO:0010198 GO:0010183
GRMZM2G121631	4	45484900	45485872	3298	113	1002	59	4.79	P	expansin B2 (ATEXPB2)		GO:0009664 GO:0009892 GO:0006629 GO:0006357 GO:0048869 GO:0030247 GO:0019953 GO:0009790 GO:0048513 GO:0004553 GO:0048518 GO:0065008 GO:0009056 GO:0005576
GRMZM2G122230	3	35555193	35556122	1040	44	510	19	4.47	P	invertase/pectin methylesterase inhibitor family protein putative expressed		GO:0008565 GO:0005737 GO:0007126 GO:0000279 GO:0005618 GO:0030599 GO:0009059 GO:0042157 GO:0007190 GO:0004857 GO:0043086
GRMZM2G122816	1	11523362	11525233	2868	241	1028	129	3.5	P	peroxidase precursor putative expressed	Metabolic pathways;Biosynthesis of secondary metabolites；Phenylpropanoid biosynthesis	GO:0015706 GO:0048046 GO:0042744 GO:0010106 GO:0009534 GO:0010167 GO:0009863 GO:0005739 GO:0098869 GO:0055114 GO:0071456 GO:0048767 GO:0020037 GO:0070301 GO:0050832 GO:0002679 GO:0009505 GO:0009506 GO:0010200 GO:0009664 GO:0010363 GO:0009913 GO:0004601
GRMZM2G124739	8	110003680	110005278	39	2	24	15	3.67		protein kinases		GO:0048443 GO:0048569 GO:0080167 GO:0032880 GO:0005856 GO:0044710 GO:0005730 GO:2000012 GO:0009860 GO:0009637 GO:0043481 GO:0004674 GO:0010540 GO:0009925 GO:0009507 GO:0009986 GO:0048646 GO:0009827 GO:0006468 GO:0048767 GO:0048766 GO:0043687 GO:0008361 GO:0012505 GO:0035295 GO:0048825 GO:0009640 GO:0009913 GO:0005829 GO:0009734 GO:0009958 GO:0005524 GO:0071444
GRMZM2G125356	10	122250862	122253051	1031	95	713	52	3.36	P	pectinesterase putative expressed	Metabolic pathways;Pentose and glucuronate interconversions	GO:0005737 GO:0009827 GO:0046910 GO:0019222 GO:0010383 GO:0009860 GO:0009624 GO:0030599 GO:0009505 GO:0048046 GO:0010054 GO:0045330 GO:0045490 GO:0043086
GRMZM2G126922	5	168561557	168563942	441	34	263	35	3.59	P	SNARE domain containing protein putative expressed		GO:0009595 GO:0006887 GO:0000165 GO:0006612 GO:0002831 GO:0006903 GO:0061025 GO:0009695 GO:0009697 GO:0042742 GO:0005484 GO:0030054 GO:0009827 GO:0006984 GO:0010310 GO:0006888 GO:0009862 GO:0016021 GO:0009860 GO:0009867 GO:0009611 GO:0009612 GO:0043269 GO:0043005 GO:0015696 GO:0015698 GO:0009507 GO:0043069 GO:0015672 GO:0048646 GO:0009887 GO:0006862 GO:0050832 GO:0003824 GO:0002679 GO:0012505 GO:…
GRMZM2G127106	5	200274645	200279681	1651	28	905	11	5.77	P	expansin B2 (ATEXPB2)		GO:0009664 GO:0005829 GO:0019953 GO:0016798 GO:0016740 GO:0005576 GO:0048646 GO:0009505 GO:0009506
GRMZM2G127236	5	200282154	200283467	328	3	148	1	6.3	P	expansin precursor putative expressed		GO:0005730 GO:0009987 GO:0019953 GO:0003824 GO:0005576 GO:0016592 GO:0007275 GO:0048646
GRMZM2G128549	10	144177414	144179985	1055	6	839	0	7.17	P	pectinesterase putative expressed		GO:0005737 GO:0042545 GO:0046910 GO:0000003 GO:0019222 GO:0005618 GO:0048869 GO:0016021 GO:0005886 GO:0030599 GO:0007275 GO:0010383 GO:0045330 GO:0045490 GO:0043086 GO:0009506 GO:0044724
GRMZM2G129635	9	84492350	84494263	1121	37	470	26	4.82	P	Pectin lyase-like superfamily protein	Metabolic pathways;Pentose and glucuronate interconversions	GO:0009827 GO:0009832 GO:0048767 GO:0010075 GO:0030570 GO:0008361 GO:0043481 GO:0009825 GO:0006950 GO:0009932 GO:0009926 GO:0010383 GO:0005576 GO:0045490 GO:0051704 GO:0044724
GRMZM2G130055	5	121785849	121786379	172	15	31	9	3.37	P			GO:0016021 GO:0005524 GO:0044237 GO:0005886
GRMZM2G130401	6	99713363	99716109	189	3	58	1	5.5	P	polygalacturonase (PGA4)		GO:0005737 GO:0044710 GO:0005975 GO:0071555 GO:0005618 GO:0044237 GO:0004650 GO:0009791 GO:0003006 GO:0048513 GO:0047911 GO:0009057 GO:0005576
GRMZM2G130831	8	170333416	170336357	56	1	52	0	4.77	P	cation/hydrogen exchanger 15 (ATCHX15, CHX15)		GO:0009860 GO:0005789 GO:0010351 GO:0009827 GO:0010583 GO:0015992 GO:0006885 GO:0016021 GO:0005770 GO:0010183 GO:0031969 GO:0006813 GO:0015299 GO:0006623 GO:0034220 GO:0030007 GO:0009407 GO:0005886 GO:0030104 GO:0035295 GO:0010260 GO:0003824
GRMZM2G131358	7	65261699	65261897	50	0	11	0	5.61	P			GO:0005488 GO:0044237
GRMZM2G133113	7	130490576	130491087	650	20	272	8	4.89				GO:0005737 GO:0016787 GO:0005604 GO:0005583 GO:0044237 GO:0005488 GO:0007275
GRMZM2G133129	7	130495333	130495942	4010	360	1469	208	3.41	P			GO:0005737 GO:0016787 GO:0044238 GO:0031982 GO:0044260 GO:0005583 GO:0005604 GO:0005488 GO:0005886 GO:0007275 GO:0043231
GRMZM2G134219	5	1553527	1554395	188	17	99	19	3.33	P	Proteinase inhibitor propeptide		GO:0005737 GO:0004252 GO:0000003 GO:0019222 GO:0005618 GO:0050896 GO:0009987 GO:0051179 GO:0006508 GO:0043086
GRMZM2G134528	5	89324850	89325820	272	18	34	11	3.78	P	FASCICLIN-like arabinogalactan protein 3 precursor (FLA3)		GO:0005737 GO:0016021 GO:0009987 GO:0030247 GO:0003824 GO:0008152 GO:0005886 GO:0050896 GO:0031225
GRMZM2G134752	4	147679277	147680759	274	2	102	0	6.45	P	GATA type zinc finger transcription factor family protein		GO:0015629 GO:0030427 GO:0061025 GO:0008270 GO:0060048 GO:0030018 GO:0031433 GO:0035995 GO:0007517 GO:0005634 GO:0003300 GO:0002026 GO:0055003 GO:0006874 GO:0051017 GO:0051015 GO:0050794 GO:0003824 GO:0045214 GO:0005912 GO:0005911 GO:0005886 GO:0001974 GO:0005938
GRMZM2G135456	1	45772414	45776131	108	12	78	13	3	P	tetratricopeptide repeat (TPR)-containing protein		GO:0006520 GO:0080090 GO:0031323 GO:0044249 GO:0071944 GO:0007275 GO:0005737 GO:0005634 GO:0016020 GO:0016043 GO:0016740 GO:0010468 GO:0015630 GO:0009889 GO:0044106 GO:0012505 GO:0042180 GO:0016070 GO:0006575 GO:0019538 GO:0050896 GO:0051171
GRMZM2G135570	5	59170607	59172542	752	35	297	10	4.32	P	cyclophilin 5 (ATCYP5, CYP19-4); peptidyl-prolyl cis-trans isomerase		GO:0043234 GO:0044710 GO:0030583 GO:0006457 GO:0005783 GO:0030587 GO:0005829 GO:0044351 GO:0000413 GO:0005739 GO:0030529 GO:0016740 GO:0009792 GO:0003755 GO:0042277 GO:0005634 GO:0009507
GRMZM2G136121	8	3292815	3294952	809	81	333	86	3.24	P	Protein kinase superfamily protein		GO:0016301 GO:0000123 GO:0016773 GO:0016310 GO:0016020 GO:0016043 GO:0050794 GO:0090304 GO:0009059 GO:0005488 GO:0005768 GO:0051179
GRMZM2G136170	6	135399635	135402733	118	8	44	11	3.66	P	Malectin/receptor-like protein kinase family protein (ANX1)		GO:0033044 GO:0045132 GO:0015706 GO:0042138 GO:0030244 GO:0009791 GO:0010483 GO:0009651 GO:0046777 GO:0007062 GO:0005856 GO:0051327 GO:0010167 GO:0016021 GO:0009860 GO:0004674 GO:0048513 GO:0046686 GO:0009507 GO:0009832 GO:0048646 GO:0009827 GO:0048767 GO:0060187 GO:0048193 GO:0016324 GO:0043680 GO:0050832 GO:0030048 GO:0006833 GO:0012505 GO:0006972 GO:0009266 GO:0007131 GO:0009506 GO:0090404 GO:…
GRMZM2G136313	1	182321764	182323968	66	6	33	3	3.19	P	U-box domain-containing protein 15		GO:0044710 GO:0015630 GO:0010200 GO:0016567 GO:0048586 GO:0005829 GO:0009908 GO:0000151 GO:0016881 GO:0031348 GO:0004842 GO:0005911 GO:0009743 GO:0043069 GO:0005634 GO:0009507
GRMZM2G136400	8	173112421	173119396	159	11	94	8	3.67	P	CBL-interacting protein kinase 20 (CIPK20, PKS18, SnRK3.6)		GO:0010107 GO:0007275 GO:0005856 GO:0042538 GO:0005634 GO:0009860 GO:0051365 GO:0004674 GO:0010540 GO:0019375 GO:0007584 GO:0005524 GO:0009827 GO:0006468 GO:0019722 GO:0043687 GO:0050832 GO:0012505 GO:0005886 GO:0042631 GO:0000911 GO:0005829 GO:0010555 GO:0009788 GO:0010118
GRMZM2G137037	3	64617231	64618409	1232	116	713	104	3.33	P			GO:0005720 GO:0005829 GO:0044237 GO:0005488 GO:0000794 GO:0005886 GO:0016021
GRMZM2G137676	7	120006864	120009317	437	37	252	18	3.46	P	pectinesterase putative expressed		GO:0005737 GO:0009827 GO:0019222 GO:0010383 GO:0004857 GO:0009860 GO:0009624 GO:0030599 GO:0043086 GO:0048046 GO:0045330 GO:0007275 GO:0045490 GO:0009505 GO:0090406
GRMZM2G139431	4	45509939	45510621	1865	109	862	68	4.02	P	expansin B2 (ATEXPB2)		GO:0009664 GO:0044260 GO:0044238 GO:0050896 GO:0030247 GO:0019953 GO:0007275 GO:0034641 GO:0005576 GO:0004553 GO:0050789
GRMZM2G139513	4	45569242	45569997	1557	44	630	26	5.05	P	expansin B2 (ATEXPB2)		GO:0009664 GO:0032501 GO:0019953 GO:0044260 GO:0044238 GO:0050896 GO:0030247 GO:0009058 GO:0050794 GO:0034641 GO:0005576 GO:0004553
GRMZM2G139517	4	45593582	45594302	3534	216	1414	104	3.96	P	expansin B2 (ATEXPB2)		GO:0009664 GO:0044238 GO:0050896 GO:0030247 GO:0019953 GO:0050794 GO:0034641 GO:0005576 GO:0034645 GO:0004553 GO:0007275
GRMZM2G139712	7	36220800	36225694	19	174	189	155	-3.2		Myosin-6		GO:0016459 GO:0009791 GO:0060151 GO:0051301 GO:0051234 GO:0031410 GO:0003779 GO:0048513 GO:0065007 GO:0003774 GO:0048646 GO:0048768 GO:0005938 GO:0008152 GO:0051646 GO:0051645 GO:0044702 GO:0010154 GO:0009913 GO:0010091 GO:0050896 GO:0005524
GRMZM2G140448	10	91693026	91694932	52	5	9	4	3.08	P	cytochrome P450 putative expressed (CYP71B35)		GO:0032502 GO:0044238 GO:0016021 GO:0031090 GO:0020037 GO:0005634 GO:0044237 GO:0005789 GO:0005740 GO:0044281 GO:0005506 GO:0018674 GO:0050896 GO:0055114 GO:0009507
GRMZM2G141034	4	29873533	29875971	172	0	37	0	7.37	P	sugar transporter 1 (ATSTP1, STP1)		GO:0006863 GO:0009627 GO:0010167 GO:0008506 GO:0005773 GO:0031410 GO:0005634 GO:0015758 GO:0015757 GO:0035428 GO:0015770 GO:0005358 GO:0003824 GO:0009536 GO:0012505 GO:0005887 GO:0009644 GO:0009506 GO:0031090 GO:0043090 GO:0009624 GO:0044237
GRMZM2G142584	8	118896318	118898981	4870	436	3045	392	3.41	P	monocopper oxidase putative expressed	Metabolic pathways;Ascorbate and aldarate metabolism	GO:0048569 GO:0048046 GO:0046658 GO:0008447 GO:0009825 GO:0052716 GO:0005615 GO:0010584 GO:0043481 GO:0005774 GO:0009506 GO:0046688 GO:0005507 GO:0016126 GO:0052541 GO:0046274 GO:0048767 GO:0080167 GO:0052546 GO:0010817 GO:0010228 GO:0010227 GO:0009505 GO:0055114 GO:0009834 GO:0009913 GO:0009932
GRMZM2G143335	7	39139340	39140490	136	0	70	1	7.03		Proteinase inhibitor propeptide		GO:0005737 GO:0031326 GO:0090304 GO:0005488 GO:0034645 GO:0008236
GRMZM2G144856	5	200097901	200098990	633	14	399	5	5.33	P	expansin B2 (ATEXPB2)		GO:0009664 GO:0005829 GO:0019953 GO:0016798 GO:0016740 GO:0005576 GO:0048646 GO:0009505 GO:0009506
GRMZM2G144898	5	200101418	200102664	333	8	157	1	5.15		expansin B2 (ATEXPB2)		GO:0009664 GO:0005829 GO:0019953 GO:0016798 GO:0016740 GO:0005576 GO:0048646 GO:0009505 GO:0009506
GRMZM2G145930	2	228186654	228208239	181	12	7	9	3.74				GO:0006468 GO:0006470 GO:0043687 GO:0004722 GO:0004674 GO:0006950 GO:0007165 GO:0005524
GRMZM2G148374	4	173746259	173749650	2972	111	1768	61	4.66		H(+)-ATPase 8 (AHA8, HA8)	Metabolic pathways;Oxidative phosphorylation	GO:0042138 GO:0009414 GO:0009651 GO:0000166 GO:0046130 GO:0010023 GO:0015992 GO:0010089 GO:0031410 GO:0016021 GO:0007129 GO:0005774 GO:0046872 GO:0009207 GO:0005794 GO:0019761 GO:0009154 GO:0034220 GO:0010119 GO:0005886 GO:0009737 GO:0007131 GO:0008553 GO:0009506 GO:0009507 GO:0007033 GO:0007035 GO:0006754 GO:0005634
GRMZM2G149060	9	72683390	72685462	6	65	99	77	-3.3		HEAT repeat-containing protein		GO:0005737 GO:0044238 GO:0016021 GO:0044237 GO:0050794 GO:0003824 GO:0005911 GO:0005886 GO:0016592 GO:0043170
GRMZM2G150350	4	74057426	74058828	414	0	219	0	8.63	P	aspartic proteinase nepenthesin-1 precursor putative expressed		GO:0005794 GO:0044710 GO:0005770 GO:0044260 GO:0004190 GO:0016020 GO:0048046 GO:0065007 GO:0080167 GO:0006508 GO:0009505
GRMZM2G151755	5	121087510	121089347	935	8	338	5	6.63		Pectin lyase-like superfamily protein	Metabolic pathways;Pentose and glucuronate interconversions	GO:0005737 GO:0005975 GO:0005618 GO:0010047 GO:0044237 GO:0004650 GO:0071555 GO:0048513 GO:0009901 GO:0010227 GO:0005576 GO:0047911 GO:0009057 GO:0042991
GRMZM2G153217	8	172795693	172797056	97	4	66	0	4.23	P			GO:0005634 GO:0005488 GO:0044237 GO:0005886
GRMZM2G153262	6	99515285	99516596	143	0	60	1	7.1	P	Pectin lyase-like superfamily protein		GO:0005737 GO:0044710 GO:0005975 GO:0071555 GO:0005618 GO:0044237 GO:0004650 GO:0003006 GO:0005576 GO:0009057 GO:0047911 GO:0007275
GRMZM2G153368	5	187016197	187017094	1735	184	563	66	3.16	P			GO:0005737 GO:0004518 GO:0009987 GO:0007275 GO:0006952 GO:0005576 GO:0005886 GO:0003677 GO:0009505
GRMZM2G153797	4	237927583	237929247	60	514	603	528	-3.14		DNA-directed RNA polymerase V subunit 1		GO:0006306 GO:0044710 GO:0016604 GO:0005730 GO:0000419 GO:0030422 GO:0003677 GO:0000418 GO:0001056 GO:0005666 GO:0006383 GO:0009507
GRMZM2G155260	8	5821242	5823980	82	3	52	6	4.31	P	Malectin/receptor-like protein kinase family protein (ANX1)		GO:0033044 GO:0045132 GO:0015706 GO:0042138 GO:0030244 GO:0009791 GO:0010483 GO:0009651 GO:0046777 GO:0007062 GO:0005856 GO:0051327 GO:0010167 GO:0016021 GO:0009860 GO:0004674 GO:0048513 GO:0046686 GO:0009507 GO:0009832 GO:0048646 GO:0009827 GO:0048767 GO:0060187 GO:0048193 GO:0016324 GO:0043680 GO:0050832 GO:0030048 GO:0006833 GO:0012505 GO:0006972 GO:0009266 GO:0007131 GO:0009506 GO:0090404 GO:…
GRMZM2G156857	8	78520915	78522102	336	4	104	7	6.01		Cysteine-rich secretory proteins Antigen 5 and Pathogenesis-related 1 (CAP)		GO:0016787 GO:0031410 GO:0009987 GO:0006952 GO:0016740 GO:0005488 GO:0008152 GO:0051707 GO:0051179
GRMZM2G157803	6	133698320	133700202	47	1	21	7	4.52		ACG kinases include homologs to PKA PKG and PKC		GO:0048443 GO:0048569 GO:0080167 GO:0032880 GO:0005856 GO:0044710 GO:0005730 GO:2000012 GO:0009860 GO:0009637 GO:0043481 GO:0004674 GO:0010540 GO:0009925 GO:0009507 GO:0009986 GO:0048646 GO:0009827 GO:0006468 GO:0048767 GO:0048766 GO:0043687 GO:0008361 GO:0012505 GO:0035295 GO:0048825 GO:0009640 GO:0009913 GO:0005829 GO:0009734 GO:0009958 GO:0005524
GRMZM2G158649	8	144731895	144732805	52	0	27	0	5.66	P	Late embryogenesis abundant protein		GO:0050832 GO:0010286 GO:0009737 GO:0016021 GO:0004672 GO:0009611 GO:0000166 GO:0048046 GO:0009269 GO:0008152 GO:0005886 GO:0009409 GO:0009987 GO:0009644 GO:0005829 GO:0009507
GRMZM2G159179	10	5116326	5118272	52	5	81	68	3.08	P	cytochrome P450 putative expressed (CYP94C1)		GO:0080110 GO:0020037 GO:0009753 GO:0016709 GO:0005773 GO:0005634 GO:0042180 GO:0031966 GO:0009694 GO:0018685 GO:0005506 GO:0005789 GO:0042761 GO:0010345 GO:0055114 GO:0009507
GRMZM2G160113	3	69379611	69380680	1372	75	687	87	4.11	P	soybean gene regulated by cold-2 (SRC2)		GO:0032502 GO:0016787 GO:0012505 GO:0016192 GO:0098588 GO:0009987 GO:0030659 GO:0045202 GO:0005488 GO:0050896 GO:0051641
GRMZM2G160526	6	99103865	99105564	3872	262	2243	137	3.81	P	polygalacturonase putative expressed	Metabolic pathways;Pentose and glucuronate interconversions	GO:0005737 GO:0005975 GO:0071555 GO:0005618 GO:0044237 GO:0004650 GO:0009791 GO:0003006 GO:0048513 GO:0005576 GO:0047911 GO:0009057 GO:0042991
GRMZM2G160626	6	99117232	99118814	1389	37	891	23	5.13	P	polygalacturonase putative expressed	Metabolic pathways;Pentose and glucuronate interconversions	GO:0005737 GO:0005975 GO:0071555 GO:0005618 GO:0044237 GO:0004650 GO:0009791 GO:0003006 GO:0048513 GO:0005576 GO:0047911 GO:0009057 GO:0042991
GRMZM2G162384	6	99355988	99357434	78	0	35	0	6.24	P	Pectin lyase-like superfamily protein		GO:0005737 GO:0005975 GO:0005618 GO:0010047 GO:0044237 GO:0004650 GO:0071555 GO:0005576 GO:0009901 GO:0010227 GO:0047911 GO:0009057 GO:0042991
GRMZM2G162461	5	165695594	165700950	1192	116	1261	75	3.28	P	Sec14p-like phosphatidylinositol transfer family protein (COW1, SRH1)		GO:0005794 GO:0006656 GO:0031090 GO:0009913 GO:0015914 GO:0048768 GO:0008526 GO:0003824 GO:0042439 GO:0005488 GO:0005886 GO:0009506 GO:0048527 GO:0009908 GO:0046165 GO:0048646
GRMZM2G164182	4	188880588	188882130	231	2	75	4	6.21	P	bifunctional monodehydroascorbate reductase and carbonic anhydrasenectarin-3	Metabolic pathways;Nitrogen metabolism	GO:0009535 GO:0009570 GO:0006730 GO:0048731 GO:0065007 GO:0008270 GO:0005886 GO:0010037 GO:0004089
GRMZM2G164674	3	209108962	209111500	534	6	383	12	6.19	P	glyoxal oxidase-related putative expressed		GO:0009827 GO:0044238 GO:0005576 GO:0009908 GO:0050896 GO:0009860 GO:0048507 GO:0009790 GO:0043412 GO:0048513 GO:0048827 GO:0045480 GO:0051641 GO:0005874 GO:0050789 GO:0009507
GRMZM2G164785	3	53392404	53393425	2065	53	952	14	5.19	P	expansin B2 (ATEXPB2)		GO:0005794 GO:0009664 GO:0005829 GO:0016798 GO:0019953 GO:0016740 GO:0005576 GO:0009506 GO:0009505 GO:0048646
GRMZM2G165413	1	233356941	233360814	103	2	14	2	5.05	P			GO:0005783 GO:0044237 GO:0016020 GO:0005739 GO:0003824 GO:0007165 GO:0009506 GO:0005488
GRMZM2G165433	9	11782450	11785572	210	21	100	27	3.2	P	serine threonine kinase putative expressed		GO:0048440 GO:0016881 GO:0009827 GO:0007165 GO:0005856 GO:0044710 GO:0005634 GO:0009860 GO:0004674 GO:0005524 GO:0005737 GO:0006468 GO:0030048 GO:0006950 GO:0012505 GO:0035295 GO:0004842 GO:0010092 GO:0010093 GO:0000151 GO:0016567 GO:0002238
GRMZM2G166044	4	238041718	238043744	5073	485	2222	389	3.32	P	calmodulin-binding protein-related		GO:0005737 GO:0006310 GO:0007127 GO:0000279 GO:0051172 GO:0006355 GO:0048869 GO:0016021 GO:0031324 GO:0070647 GO:0003824 GO:0032501 GO:0007165 GO:0033554 GO:0005886 GO:0051276 GO:0007190 GO:0051641 GO:0005516
GRMZM2G166745	3	229672897	229675311	130	5	56	15	4.38	P	cation/hydrogen exchanger 15 (ATCHX15, CHX15)		GO:0005770 GO:1902600 GO:0005789 GO:0010351 GO:0009827 GO:0010583 GO:0006885 GO:0016021 GO:0009860 GO:0010183 GO:0031969 GO:0006813 GO:0006623 GO:0003824 GO:0030007 GO:0009407 GO:0005886 GO:0030104 GO:0035295 GO:0010260 GO:0009627 GO:0005451
GRMZM2G167318	2	206275994	206278302	22	193	260	263	-3.14		HOPM interactor 7		GO:0005737 GO:0046907 GO:0005730 GO:0016021 GO:0006887 GO:0016043 GO:0005654 GO:0005886 GO:0003677 GO:0009653 GO:0007275
GRMZM2G168439	8	156113368	156114570	4408	484	1790	286	3.12	P	major intrinsic protein (MIP) family		GO:0000326 GO:0005783 GO:0072489 GO:0030104 GO:0042742 GO:0010106 GO:0009651 GO:0009941 GO:0009825 GO:0010167 GO:0043674 GO:0016021 GO:0043481 GO:0015250 GO:0015254 GO:0015793 GO:0046686 GO:0042807 GO:0005794 GO:0048767 GO:0006833 GO:0006972 GO:0005886 GO:0009269 GO:0009505 GO:0007030 GO:0015204 GO:0071918 GO:0015200 GO:0009705 GO:0080170 GO:0009932 GO:0045492 GO:0010413
GRMZM2G169033	4	181560320	181563810	1	46	5	16	-4.62		laccase family protein		GO:0005737 GO:0044238 GO:0016722 GO:0052716 GO:0009834 GO:0009414 GO:0016020 GO:0048046 GO:0046274 GO:0046688 GO:0010228 GO:0005507 GO:0055114
GRMZM2G169440	5	13885835	13887148	4	46	86	72	-3.3		Digalactosyldiacylglycerol synthase 1 chloroplastic		GO:0005488 GO:0044237
GRMZM2G170034	5	188946269	188947853	293	23	132	2	3.55	P	GATA type zinc finger transcription factor family protein		GO:0015629 GO:0030427 GO:0061025 GO:0008270 GO:0060048 GO:0030018 GO:0031433 GO:0035995 GO:0007517 GO:0005634 GO:0003300 GO:0002026 GO:0055003 GO:0006874 GO:0051017 GO:0051015 GO:0050794 GO:0003824 GO:0045214 GO:0005938 GO:0005886 GO:0001974
GRMZM2G173289	2	30538908	30540567	68	1	30	0	5.04	P	Lung seven transmembrane receptor domain containing protein putative expressed		GO:0005794 GO:0005783 GO:0016021 GO:0009987 GO:0016740 GO:0048513 GO:0002237 GO:0010015 GO:0008152 GO:0046872 GO:0005768 GO:0050789
GRMZM2G173419	2	156916195	156916580	204	20	91	24	3.22	P			GO:0032502 GO:0016070 GO:0006469 GO:0009889 GO:0044249 GO:0010467 GO:0009059 GO:0005488 GO:0035556 GO:0010646 GO:0051179
GRMZM2G173738	2	89897721	89899192	100	6	55	35	3.78	P			GO:0044238 GO:0032501 GO:0048869 GO:0034641 GO:0016043 GO:0044249 GO:0010467 GO:0030915 GO:0004672 GO:0051234 GO:0005488
GRMZM2G175243	9	37392815	37393572	3887	217	1515	89	4.09	P			GO:0016787 GO:0016021 GO:0044237 GO:0005622 GO:0034220 GO:0006821 GO:0005488 GO:0005247 GO:0044070
GRMZM2G177142	6	95485769	95486821	1172	135	287	126	3.04	P	Fasciclin-like arabinogalactan protein 8		GO:0005737 GO:0050896 GO:0016021 GO:0009987 GO:0030247 GO:0003824 GO:0008152 GO:0005886 GO:0007275 GO:0031225
GRMZM2G180071	3	35492943	35495573	98	10	59	12	3.1	P	Receptor-like protein kinase ANXUR1		GO:0033044 GO:0045132 GO:0015706 GO:0042138 GO:0030244 GO:0009791 GO:0010483 GO:0009651 GO:0046777 GO:0007062 GO:0005856 GO:0051327 GO:0010167 GO:0016021 GO:0009860 GO:0004674 GO:0048513 GO:0046686 GO:0009507 GO:0009832 GO:0048646 GO:0009827 GO:0048767 GO:0060187 GO:0048193 GO:0016324 GO:0043680 GO:0050832 GO:0030048 GO:0006833 GO:0012505 GO:0006972 GO:0009266 GO:0007131 GO:0009506 GO:0090404 GO:…
GRMZM2G180150	10	2033382	2034248	21	301	379	330	-3.85		brick3;(GRL, NAP1, NAPP) transcription activators		GO:0016070 GO:0003824 GO:0030027 GO:0016021 GO:0016043 GO:0044249 GO:0010467 GO:0065007 GO:0005886 GO:0032403 GO:0022402 GO:0007275
GRMZM2G181158	2	201783834	201787692	17	148	185	135	-3.12		Protein CHROMATIN REMODELING 4		GO:0043234 GO:0005737 GO:0051276 GO:0050896 GO:0000790 GO:0005654 GO:0006355 GO:0016740 GO:0008270 GO:0006366 GO:0007275 GO:0048523
GRMZM2G300969	10	24619520	24622715	3052	70	1415	43	5.36	P	Leucine-rich repeat (LRR) family protein		GO:0005737 GO:0031090 GO:0016772 GO:0016021 GO:0009987 GO:0048513 GO:0012505 GO:0005634 GO:0050896
GRMZM2G301647	4	175306259	175309558	71	3	2	7	4.1	P	serine threonine kinase		GO:0048440 GO:0016881 GO:0007165 GO:0005856 GO:0044710 GO:0009860 GO:0004674 GO:0005524 GO:0009827 GO:0006468 GO:0030048 GO:0006950 GO:0012505 GO:0005886 GO:0035295 GO:0004842 GO:0009507 GO:0010092 GO:0010093 GO:0000151 GO:0016567 GO:0002238
GRMZM2G302913	3	146685522	146689773	128	982	1200	1023	-3				GO:0044238 GO:0005938 GO:0032501 GO:0009987 GO:0003824 GO:0065007 GO:0005884 GO:0051179 GO:0010008
GRMZM2G303105	10	89232031	89237153	36	332	374	349	-3.24		chromatin complex subunit A		GO:0031328 GO:0006325 GO:0048869 GO:0005634 GO:0051254 GO:0010558 GO:0051253 GO:0016740 GO:0010628 GO:0006357 GO:0010629 GO:0048731 GO:0016021
GRMZM2G303661	3	30541433	30545499	20	159	145	139	-3		phosphatidylinositol 3- and 4-kinase family protein	Homologous recombination	GO:0016070 GO:0005737 GO:0044710 GO:0001727 GO:0034645 GO:0006281 GO:0016773 GO:0005874 GO:0006468 GO:0005815 GO:0007017 GO:0005869 GO:0005488 GO:0019028 GO:0050794 GO:0019031 GO:0005819 GO:0051276
GRMZM2G306693	6	99792704	99794969	40	0	31	1	5.29	P	polygalacturonase (PGA4)	Metabolic pathways;Pentose and glucuronate interconversions	GO:0005737 GO:0044710 GO:0005975 GO:0044237 GO:0004650 GO:0009791 GO:0003006 GO:0005576 GO:0047911 GO:0009057
GRMZM2G309479	3	146286651	146287229	3649	352	1039	304	3.3	P	Plant thionin family protein		GO:0005576 GO:0005488 GO:0044237
GRMZM2G309512	3	146284125	146287100	3677	373	1057	342	3.23		receptor-like protein kinase 1		GO:0005856 GO:0005737 GO:0000186 GO:0016021 GO:0006487 GO:0030246 GO:0046777 GO:0004674 GO:0048544 GO:0012505 GO:0050321 GO:0005634 GO:0044459 GO:0007275 GO:0005524 GO:0005516
GRMZM2G311883	5	28954308	28961092	2	57	80	69	-4.34				GO:0005737 GO:0008565 GO:0008139 GO:0031965 GO:0016021 GO:0009987 GO:0006606 GO:0034399 GO:0005654 GO:0008536 GO:0043170 GO:0050789
GRMZM2G317406	10	111861870	111862808	6415	387	2269	296	3.98	P	Pollen allergen and extensin family protein (POEI20)		GO:0007030 GO:0032501 GO:0005615 GO:0016021 GO:0006816 GO:0005622 GO:0003824 GO:0019344 GO:0065007 GO:0009651
GRMZM2G320175	6	99582016	99584295	3225	55	1881	32	5.78		polygalacturonase putative expressed		GO:0005737 GO:0005975 GO:0071555 GO:0005618 GO:0044237 GO:0004650 GO:0009791 GO:0003006 GO:0048513 GO:0005576 GO:0047911 GO:0009057 GO:0042991
GRMZM2G320786	5	207940319	207943169	6	64	2	3	-3.28		Laccase-14		GO:0005737 GO:0044238 GO:0052716 GO:0009834 GO:0009414 GO:0016020 GO:0048046 GO:0046274 GO:0046688 GO:0010228 GO:0005507 GO:0055114
GRMZM2G321870	1	47325849	47327885	517	3	212	3	6.95	P	pectinesterase putative expressed	Metabolic pathways;Pentose and glucuronate interconversions	GO:0005737 GO:0009827 GO:0046910 GO:0019222 GO:0010383 GO:0009860 GO:0009624 GO:0030599 GO:0043086 GO:0048046 GO:0010054 GO:0045330 GO:0009505 GO:0045490 GO:0090406
GRMZM2G322493	5	78792908	78799687	15	257	383	281	-4.08		SUPPRESSOR OF AUXIN RESISTANCE1	RNA transport	GO:0005737 GO:0032502 GO:0016973 GO:0044238 GO:0005730 GO:0005643 GO:0016021 GO:0031965 GO:0016043 GO:0009733 GO:0034645 GO:0005886 GO:0009409 GO:0005487
GRMZM2G322866	6	97503731	97504440	168	16	27	10	3.25	P			GO:0005488 GO:0016779 GO:0016021 GO:0006351 GO:0004871 GO:0005886 GO:0007165
GRMZM2G323418	9	20163896	20165966	860	24	399	14	5.04	P	Pectin lyase-like superfamily protein	Metabolic pathways;Pentose and glucuronate interconversions	GO:0009827 GO:0016787 GO:0009832 GO:0048767 GO:0010075 GO:0030570 GO:0009825 GO:0043481 GO:0006950 GO:0009932 GO:0009926 GO:0005488 GO:0010383 GO:0005576 GO:0045490 GO:0051704 GO:0044724
GRMZM2G323499	7	952700	955035	314	14	260	17	4.33		RNA-binding protein		GO:0005737 GO:0044710 GO:0016043 GO:0030529 GO:0005654 GO:0003824 GO:0065007 GO:0003723 GO:0000166 GO:0007275 GO:0006396
GRMZM2G323558	8	5720615	5722217	1185	72	561	44	3.96	P	invertase/pectin methylesterase inhibitor family protein putative expressed		GO:0005737 GO:0046910 GO:0019222 GO:0005618 GO:0050877 GO:0009987 GO:0030599 GO:0051179 GO:0048513 GO:0005488 GO:0043086
GRMZM2G325474	3	106505682	106506228	88	0	38	0	6.41				GO:0044237
GRMZM2G325653	5	64702557	64709182	80	3	56	0	4.27		Seven transmembrane MLO family protein (ATMLO5, MLO5)		GO:0002376 GO:0016021 GO:0016811 GO:0006952 GO:0005516 GO:0042221 GO:0008219 GO:0051707
GRMZM2G329584	9	97711044	97711898	261	14	59	27	4.06	P			GO:0019725 GO:0046718 GO:0008233 GO:0031644 GO:0016021 GO:0005231 GO:0016070 GO:0033644 GO:0015672 GO:0016740 GO:0005576 GO:0007165 GO:0019028 GO:0017111 GO:0046873 GO:0032259 GO:0019031 GO:0050801 GO:0005488
GRMZM2G329944	3	72889933	72898829	43	381	420	298	-3.18		Piezo-type mechanosensitive ion channel homolog		GO:0032502 GO:0016787 GO:0016772 GO:0016021 GO:0009707 GO:0005739 GO:0006355 GO:0006366 GO:0008381 GO:0005634
GRMZM2G331105	9	114069436	114088947	22	209	282	175	-3.26		pleckstrin homology (PH) domain-containing protein		GO:0016021 GO:0006810 GO:0044237 GO:0005622 GO:0005488 GO:0004553
GRMZM2G331283	6	105131768	105133835	67	7	10	7	3.02	P	Amino acid permease 6		GO:0005737 GO:0016787 GO:0005275 GO:0043090 GO:0010363 GO:1900378 GO:0003333 GO:0015810 GO:0031965 GO:0009963 GO:0009624 GO:0015804 GO:0015827 GO:0015837 GO:0005887 GO:2000762 GO:0015809 GO:0015179
GRMZM2G332687	5	215751740	215753860	38	372	424	415	-3.32	P	myosin2		GO:0016459 GO:0009791 GO:0005903 GO:0060151 GO:0051301 GO:0042995 GO:0031410 GO:0048513 GO:0065007 GO:0003774 GO:0048646 GO:0048768 GO:0051015 GO:0005938 GO:0008152 GO:0051646 GO:0051234 GO:0044702 GO:0010154 GO:0009913 GO:0010091 GO:0050896 GO:0051645 GO:0005524
GRMZM2G339129	6	57286137	57286982	365	1	27	2	7.45		invertase/pectin methylesterase inhibitor family protein putative expressed		GO:0005737 GO:0016787 GO:0005618 GO:0044237 GO:0005488 GO:0004857
GRMZM2G339781	8	153841226	153841772	84	7	9	5	3.34	P	Plant thionin family protein		GO:0019226 GO:0005975 GO:0016021 GO:0007269 GO:0004645
GRMZM2G341918	1	6067323	6077435	17	156	179	95	-3.19	P	Callose synthase 3		GO:0005737 GO:0009653 GO:0000003 GO:0003824 GO:0048869 GO:0016021 GO:0006810 GO:0016043 GO:0044249 GO:0065007 GO:0002252 GO:0009279
GRMZM2G342744	2	118133562	118133777	2174	153	622	87	3.75	P			GO:0005737 GO:0004497 GO:0006561 GO:0016620 GO:0005488 GO:0055114
GRMZM2G343437	10	8359295	8361689	146	0	50	0	7.13	P	exocyst subunit exo70 family protein C1 (ATEXO70C1, EXO70C1)		GO:0009860 GO:0015706 GO:0009697 GO:0010106 GO:0010102 GO:0009738 GO:0009827 GO:0010167 GO:0070062 GO:0000145 GO:0005634 GO:0006887 GO:0016740 GO:0048354 GO:0033036 GO:0048646 GO:0048193 GO:0005886 GO:0035295 GO:0009644 GO:0090406 GO:0009506 GO:0046907 GO:0042542 GO:0005829 GO:0009627 GO:0002237 GO:0065010
GRMZM2G344857	2	146624792	146628668	133	7	98	9	4	P	Phosphatidylinositol-4-phosphate 5-kinase family protein	Metabolic pathways;Inositol phosphate metabolism；Phosphatidylinositol signaling system；Endocytosis	GO:0006520 GO:0072583 GO:0005789 GO:0007164 GO:0009827 GO:0010311 GO:0001727 GO:0005634 GO:0009860 GO:0065007 GO:0043005 GO:0009846 GO:0009908 GO:0048645 GO:0016308 GO:0016324 GO:0048768 GO:0051015 GO:0030048 GO:0006950 GO:0009536 GO:0003785 GO:0005975 GO:0035295 GO:0090406 GO:0046854 GO:0009913 GO:0006499 GO:0009958 GO:0044445 GO:0006412 GO:0010118
GRMZM2G347047	4	168766590	168768510	221	3	116	7	5.73	P	CAMK includes calcium/calmodulin depedent protein kinase		GO:0015629 GO:0080092 GO:0005789 GO:0010359 GO:0009651 GO:0046777 GO:0009827 GO:0009751 GO:0031982 GO:0005773 GO:0005634 GO:0005777 GO:0004674 GO:0005509 GO:0046686 GO:0005524 GO:0043687 GO:0010119 GO:0005886 GO:0009789 GO:0031090 GO:0005829 GO:2000026
GRMZM2G348014	4	219285839	219289867	6	56	62	38	-3.09	P	calcium-dependent lipid-binding family protein		GO:0016070 GO:0022627 GO:0019219 GO:0006520 GO:0070647 GO:0005739 GO:0000166 GO:0006413
GRMZM2G349554	6	139140734	139151624	25	252	286	262	-3.35	P	Serine/threonine-protein kinase TOR	Autophagy	GO:0043234 GO:0005794 GO:0044260 GO:0016773 GO:0016310 GO:0016301 GO:0000166 GO:0019538 GO:0006950 GO:0005886 GO:0035556 GO:0005774 GO:0048522
GRMZM2G352359	2	6316002	6317978	199	1	145	2	6.58	P	pectinesterase putative expressed		GO:0005737 GO:0009827 GO:0043086 GO:0010363 GO:1900378 GO:0009624 GO:0004857 GO:0010383 GO:0009963 GO:0030599 GO:0009684 GO:0048046 GO:0010054 GO:0045330 GO:0009505 GO:0045490 GO:2000762 GO:0090406 GO:0009506 GO:0000003
GRMZM2G353497	1	260398622	260400233	377	44	109	48	3	P			GO:0016787 GO:0005215 GO:0016021 GO:0044237 GO:0005488 GO:0030288
GRMZM2G353957	3	103186921	103189726	66	7	38	4	3	P	Calcium-dependent protein kinase 1		GO:0015629 GO:0080092 GO:0005789 GO:0010359 GO:0009651 GO:0046777 GO:0009827 GO:0009751 GO:0031982 GO:0005773 GO:0005634 GO:0005777 GO:0004674 GO:0005509 GO:0046686 GO:0005524 GO:0043687 GO:0010119 GO:0005886 GO:0009789 GO:0031090 GO:0005829 GO:2000026
GRMZM2G357124	3	4752697	4753618	414	2	91	3	7.05	P	RALF		GO:0005179 GO:0019722 GO:0044237 GO:0005622 GO:0048046 GO:0004871 GO:0009506
GRMZM2G359237	8	149433917	149437336	20	163	196	171	-3.03				GO:0005737 GO:0006139 GO:0048699 GO:0005634 GO:0016043 GO:0016740 GO:0007166 GO:0009653 GO:0016021 GO:0051641
GRMZM2G360025	9	153535442	153539177	60	0	60	0	5.86	P			GO:0007399 GO:0006813 GO:0016021 GO:0030154 GO:0044237 GO:0050794 GO:0016740 GO:0005886 GO:0022610
GRMZM2G364349	6	72167999	72169783	2701	91	1098	26	4.81	P	Pectin lyase-like superfamily protein	Metabolic pathways;Pentose and glucuronate interconversions	GO:0009827 GO:0009832 GO:0048767 GO:0010075 GO:0030570 GO:0010383 GO:0009825 GO:0043481 GO:0006950 GO:0009932 GO:0009926 GO:0005886 GO:0006949 GO:0005576 GO:0045490 GO:0051704 GO:0044724
GRMZM2G367023	1	98327351	98335355	19	175	216	167	-3.2		DnaJ homolog subfamily C GRV2		GO:0005794 GO:0005634 GO:0005770 GO:0005739 GO:0016740 GO:0006364 GO:0010008
GRMZM2G369432	1	295803707	295804892	524	11	174	12	5.38	P	invertase/pectin methylesterase inhibitor family protein putative expressed		GO:0005737 GO:0046910 GO:0005618 GO:0030599 GO:0044237 GO:0043086 GO:0005488
GRMZM2G369472	1	199674463	199675600	67	1	21	33	5.02		ethylene-responsive element binding protein (ATEBP)		GO:0009755 GO:0044710 GO:0009536 GO:0006355 GO:0003700 GO:0000160 GO:0005634 GO:0003824 GO:0006950 GO:0003677 GO:0007275
GRMZM2G369701	4	180698023	180703686	47	4	10	11	3.2	P	dnaJ homolog subfamily C member 7		GO:0043234 GO:0044267 GO:0044710 GO:0015630 GO:0030544 GO:0050896 GO:0005829 GO:0016020 GO:0071944 GO:0016043 GO:0005654 GO:0016740 GO:0006807 GO:0051082 GO:0070389 GO:0007275 GO:0012505
GRMZM2G370162	5	214676254	214699598	93	794	1152	835	-3.15		UDP-glucose:glycoprotein glucosyltransferase	Protein processing in endoplasmic reticulum	GO:0010204 GO:0009751 GO:0006486 GO:0030587 GO:0046283 GO:0005634 GO:0005788 GO:0016051 GO:0009626 GO:0009117 GO:0051082 GO:0009507 GO:0006412 GO:0003980 GO:0097359
GRMZM2G373589	7	91542566	91542967	45	4	6	6	3.14				GO:0005355 GO:0005351 GO:0016740 GO:0044237 GO:0046323 GO:1904659 GO:0005488 GO:0005887 GO:0015992
GRMZM2G374375	5	121216432	121218277	1046	12	366	8	6.27	P	Pectin lyase-like superfamily protein	Metabolic pathways;Pentose and glucuronate interconversions	GO:0005737 GO:0005975 GO:0005618 GO:0010047 GO:0044237 GO:0004650 GO:0071555 GO:0048513 GO:0009901 GO:0010227 GO:0005576 GO:0047911 GO:0009057 GO:0042991
GRMZM2G379913	3	14837783	14844132	23	308	460	291	-3.75		ARM repeat superfamily protein	Ribosome biogenesis in eukaryotes	GO:0005737 GO:0016787 GO:0032040 GO:0034455 GO:0030686 GO:0000462 GO:0045943 GO:0030515
GRMZM2G380777	1	107294500	107295807	14	116	151	94	-3.03				GO:0005737 GO:0006996 GO:0044260 GO:0007399 GO:0044238 GO:0050896 GO:0030424 GO:0004553
GRMZM2G381357	7	130527125	130527700	418	21	205	25	4.18	P			GO:0006259 GO:0006342 GO:0043687 GO:0005488
GRMZM2G387890	6	118452039	118460501	35	654	719	476	-4.25		Chromatin structure-remodeling complex protein SYD		GO:0005737 GO:0006325 GO:0016021 GO:0017111 GO:0006355 GO:0000790 GO:0048513 GO:0009653 GO:0005524
GRMZM2G390475	4	47914741	47915857	252	22	78	21	3.39	P	ENTH/VHS family protein	Endocytosis	GO:0005794 GO:0016192 GO:0005634 GO:0005543 GO:0016043 GO:0003824 GO:0005886 GO:0030136 GO:0005768 GO:0051641
GRMZM2G390678	5	39292865	39295169	1928	25	1080	21	6.15	P	GDSL esterase/lipase EXL3		GO:0005737 GO:0016298 GO:0006629 GO:0009725 GO:0009987 GO:0006950 GO:0023052 GO:0051707
GRMZM2G394259	6	99529941	99532218	2327	58	1062	24	5.24	P	Exopolygalacturonase	Metabolic pathways;Pentose and glucuronate interconversions	GO:0005737 GO:0005975 GO:0071555 GO:0005618 GO:0044237 GO:0004650 GO:0009791 GO:0003006 GO:0048513 GO:0005576 GO:0047911 GO:0009057 GO:0042991
GRMZM2G395678	2	230021874	230022346	221	2	10	0	6.14		Cysteine-rich protein with paired CXXXC motifs		GO:0010466 GO:0007275 GO:0030414 GO:0005576
GRMZM2G397242	7	22512372	22513232	1322	34	314	22	5.17	P	Rapid ALkalinization Factor RALF family protein (RALFL11)		GO:0005179 GO:0004871 GO:0048046 GO:0008152 GO:0048518 GO:0042981
GRMZM2G399207	5	202285862	202286994	20	208	298	261	-3.38				GO:0009534 GO:0044260 GO:0044238 GO:0016021 GO:0005739 GO:0006950 GO:0008233
GRMZM2G399421	4	66881589	66883609	325	34	164	13	3.15	P	polygalacturonase putative expressed	Metabolic pathways;Pentose and glucuronate interconversions	GO:0005737 GO:0005975 GO:0009835 GO:0005618 GO:0010047 GO:0044237 GO:0004650 GO:0071555 GO:0048513 GO:0009901 GO:0010227 GO:0005576 GO:0047911 GO:0009057 GO:0042991
GRMZM2G399921	5	203454140	203454857	257	28	70	25	3.09	P			GO:0004222 GO:0016021 GO:0044237 GO:0005488 GO:0005886 GO:0006508
GRMZM2G401874	4	189366035	189375987	146	4	92	1	4.81	P	Cation-chloride cotransporter 1		GO:0055064 GO:0007638 GO:0006865 GO:0030424 GO:0006821 GO:0055075 GO:0035264 GO:0051452 GO:0032590 GO:0040040 GO:0043204 GO:0006884 GO:0071477 GO:0006813 GO:0015378 GO:0015379 GO:0016324 GO:0016323 GO:0034220 GO:0005887 GO:0044704 GO:0005829 GO:0005802 GO:0008511 GO:0005768 GO:0015171
GRMZM2G402088	3	210501079	210512481	40	353	407	366	-3.18				GO:0043234 GO:0031936 GO:0042393 GO:0043233 GO:0005634 GO:0005739 GO:0009536 GO:0045944 GO:0016887 GO:0003682 GO:0005524
GRMZM2G405052	6	154259478	154274538	17	219	186	104	-3.68		ribosome export associated1	Ribosome biogenesis in eukaryotes	GO:0009553 GO:0009941 GO:0009506 GO:0004175 GO:0000003 GO:0043233 GO:0050896 GO:0005739 GO:0010467 GO:0015630 GO:0040007 GO:0016887 GO:0016929 GO:0016926 GO:0034660 GO:0005634 GO:0005524 GO:0000027
GRMZM2G405690	1	292782504	292786020	29	333	417	336	-3.54				GO:0006139 GO:0009536 GO:0016787 GO:0019538 GO:0005739 GO:0005654 GO:0016740 GO:0016043 GO:0000228
GRMZM2G406026	2	57594898	57595790	200	1	114	16	6.58	P			GO:0050877 GO:0009860 GO:0007186 GO:0009507 GO:0010075
GRMZM2G406043	1	231787405	231790942	23	198	243	260	-3.12		Exportin-4		GO:0030118 GO:0005049 GO:0006611 GO:0009987 GO:0008536 GO:0005643 GO:0016740 GO:0008152 GO:0046872
GRMZM2G409839	1	292771349	292781723	52	635	553	512	-3.65				GO:0007409 GO:0005730 GO:0031410 GO:0004181 GO:0005765 GO:0008270 GO:0016887 GO:0005886 GO:0006508 GO:0050789 GO:0005524 GO:0070062
GRMZM2G414899	5	58080120	58082264	64	0	1	0	5.96	P	protein kinase		GO:0005856 GO:0000394 GO:0010363 GO:0005730 GO:0009863 GO:0009506 GO:0052033 GO:0050832 GO:0004674 GO:0002679 GO:0012505 GO:0005886 GO:0007275 GO:0009743 GO:0009507 GO:0046777 GO:0005524 GO:0010200
GRMZM2G417945	5	99445552	99447164	316	19	99	62	3.92	P	UDP-glucosyltransferase		GO:0005783 GO:0052696 GO:0080002 GO:0010016 GO:0009696 GO:0005739 GO:0009718 GO:0005634 GO:0009699 GO:0052638 GO:0005856 GO:0006984 GO:0010167 GO:0080024 GO:0031090 GO:0009863 GO:0016021 GO:0009867 GO:0071475 GO:0052639 GO:0080043 GO:0009920 GO:0080046 GO:0080167 GO:0071215 GO:0047215 GO:0009407 GO:0047251 GO:0052544 GO:0080044 GO:0050645 GO:0019761 GO:0052641 GO:0009536 GO:0018874 GO:0005886 GO:…
GRMZM2G418644	10	14695948	14698281	6643	129	4685	35	5.61		polygalacturonase putative expressed	Metabolic pathways;Pentose and glucuronate interconversions	GO:0005737 GO:0005975 GO:0071555 GO:0005618 GO:0044237 GO:0004650 GO:0009791 GO:0003006 GO:0048513 GO:0005576 GO:0047911 GO:0009057 GO:0042991
GRMZM2G419452	4	50667856	50668585	492	4	137	6	6.56	P	pollen calcium-binding protein (APC1, PC1)		GO:0012505 GO:0032501 GO:0015629 GO:0031410 GO:0050896 GO:0009987 GO:0003824 GO:0005509 GO:0005886 GO:0043292 GO:0051234 GO:0050789 GO:0043231
GRMZM2G422269	4	184567275	184572074	12	132	155	147	-3.42				GO:0005794 GO:0016021 GO:0044237 GO:0003824 GO:0005488 GO:0009279
GRMZM2G424509	6	132076708	132077510	796	29	215	26	4.66	P	RALF		GO:0005179 GO:0019722 GO:0044237 GO:0005622 GO:0048046 GO:0004871 GO:0009506
GRMZM2G425148	6	169289123	169291080	58	0	25	1	5.82	P			GO:0005488 GO:0005743 GO:0016740 GO:0016651 GO:0022904
GRMZM2G425747	3	30516930	30519604	13	116	82	110	-3.13		phosphatidylinositol 3- and 4-kinase family protein	Homologous recombination	GO:0005737 GO:0016070 GO:0001727 GO:0051276 GO:0006281 GO:0016773 GO:0005634 GO:0050794 GO:0005819 GO:0034645 GO:0005815 GO:0005874
GRMZM2G426486	10	13188783	13191633	16	164	203	253	-3.35		Ubiquitin carboxyl-terminal hydrolase 13		GO:0005737 GO:0016787 GO:0044260 GO:0044238 GO:0016021 GO:0002376 GO:0007165 GO:0005886
GRMZM2G431856	4	2054500	2055868	2164	38	1310	21	5.73	P	pectinesterase putative expressed	Metabolic pathways;Pentose and glucuronate interconversions	GO:0005737 GO:0042545 GO:0010383 GO:0005618 GO:0009860 GO:0009813 GO:0030599 GO:0005576 GO:0045490 GO:0045330 GO:0035295 GO:0090406
GRMZM2G433727	10	82272020	82276588	78	6	0	2	3.43		protein kinases		GO:0005737 GO:0016787 GO:0005634 GO:0050794 GO:0016740 GO:0012505 GO:0006289 GO:0007275
GRMZM2G435541	1	235254537	235254864	4	51	57	62	-3.45		chromatin complex subunit A		GO:0006996 GO:0046907 GO:0005634 GO:0010498 GO:0007275 GO:0000781 GO:0003677 GO:0009653 GO:0050789 GO:0005524 GO:0051704
GRMZM2G436226	1	3022700	3026815	18	160	186	145	-3.15		Zinc finger CCCH domain-containing protein 19		GO:0005737 GO:0032502 GO:0044710 GO:0032501 GO:0006366 GO:0005654 GO:0006355 GO:0016740 GO:0000785 GO:0008270 GO:0006352 GO:0003677 GO:0048519 GO:0090544 GO:0016570
GRMZM2G436856	3	191372100	191372655	39	2	17	1	3.67				GO:0022891 GO:0016787 GO:0006812 GO:0016021 GO:0044237 GO:0005488 GO:0009279 GO:0055085
GRMZM2G438378	6	128905006	128908832	196	1	99	1	6.56	P	phospholipase D4	Metabolic pathways;Biosynthesis of secondary metabolites;Glycerophospholipid metabolism；Ether lipid metabolism；Endocytosis	GO:0005783 GO:0005739 GO:0009414 GO:0009651 GO:0030136 GO:0009941 GO:0005773 GO:0005634 GO:0005546 GO:0009845 GO:0005509 GO:0009506 GO:0046466 GO:0004630 GO:0048767 GO:0098588 GO:0046686 GO:0042439 GO:0005886 GO:0009789 GO:0034638 GO:0007030 GO:0005829 GO:0070290 GO:0009873 GO:0010119
GRMZM2G438938	3	17643341	17651353	71	700	992	705	-3.35		E3 ubiquitin-protein ligase PRT6		GO:0009737 GO:0006723 GO:0000151 GO:0050994 GO:0005654 GO:0016567 GO:0005740 GO:0010029 GO:0008270 GO:0010025 GO:0061630 GO:0071596
GRMZM2G439306	8	85385219	85388105	61	4	27	2	3.57	P	Cation/H(+) antiporter 19		GO:0009860 GO:0005789 GO:0010351 GO:0009827 GO:0010583 GO:0015992 GO:0006885 GO:0016021 GO:0005770 GO:0010183 GO:0031969 GO:0006813 GO:0015299 GO:0006623 GO:0034220 GO:0030007 GO:0009407 GO:0005886 GO:0030104 GO:0035295 GO:0010260 GO:0003824
GRMZM2G439908	3	128855020	128856083	184	19	41	25	3.14	P	Plant invertase/pectin methylesterase inhibitor superfamily protein		GO:0005737 GO:0046910 GO:0019222 GO:0005618 GO:0009987 GO:0030599 GO:0006950 GO:0043086 GO:0051704
GRMZM2G442008	5	206074861	206076455	450	0	217	4	8.75	P	Peroxidase 65	Metabolic pathways;Biosynthesis of secondary metabolites；Phenylpropanoid biosynthesis	GO:0015706 GO:0042744 GO:0010359 GO:0010106 GO:0009651 GO:0009044 GO:0009827 GO:0009534 GO:0010167 GO:0009736 GO:0009860 GO:0005739 GO:0005774 GO:0020037 GO:0070301 GO:0009505 GO:0055114 GO:0010054 GO:0009913 GO:0005829 GO:0005576 GO:0004601
GRMZM2G443447	2	8786768	8792507	30	251	410	278	-3.09		Probable cinnamyl alcohol dehydrogenase 1		GO:0005524 GO:0044822 GO:0006364 GO:0005739 GO:0005730
GRMZM2G443690	3	41736526	41738505	503	37	194	44	3.66		phosphoinositide 4-kinase gamma 1 (ATPI4K GAMMA 1, PI4K GAMMA 1)		GO:0016301 GO:0006629 GO:0000123 GO:0016773 GO:0016310 GO:0016020 GO:0016043 GO:0043170 GO:0005768 GO:0051179
GRMZM2G443740	2	130242303	130245355	205	1	144	0	6.62	P	methyltransferase putative expressed		GO:0005975 GO:0044260 GO:0016021 GO:0005802 GO:0005789 GO:0009058 GO:0006807 GO:0048731 GO:0008168 GO:0032259 GO:0005768 GO:0009506 GO:0000139
GRMZM2G448511	5	15590888	15591710	781	40	617	52	4.19	P	Dehydrin 13		GO:0009507 GO:0006364 GO:0003676 GO:0005730
GRMZM2G450055	4	173741726	173749650	3056	255	1903	227	3.51		Minichromosome maintenance (MCM2/3/5) family protein (MCM5)	DNA replication	GO:0000084 GO:0031939 GO:0030174 GO:0000785 GO:0000784 GO:0031261 GO:0051567 GO:0031298 GO:0042555 GO:0000727 GO:0051322 GO:0006343 GO:0005656 GO:0006267 GO:0006268 GO:0009909 GO:0031390 GO:0042023 GO:0010389 GO:0000911 GO:0006338 GO:0000712 GO:0006271 GO:0003688 GO:0005524 GO:0003678 GO:0003682 GO:0005829
GRMZM2G451443	4	93263660	93279792	34	325	393	391	-3.29				GO:0005737 GO:0006468 GO:0050896 GO:0005634 GO:0008536 GO:0050794 GO:0012505 GO:0004672 GO:0006886 GO:0007275 GO:0005524
GRMZM2G452150	1	144075157	144076677	700	53	334	19	3.63	P	polygalacturonase putative expressed	Metabolic pathways;Pentose and glucuronate interconversions	GO:0005737 GO:0005975 GO:0009835 GO:0005618 GO:0044237 GO:0004650 GO:0009791 GO:0071555 GO:0048513 GO:0005576 GO:0047911 GO:0009057 GO:0042991
GRMZM2G453311	2	23759435	23761999	290	18	84	16	3.87	P	NAD(P)-dependent oxidoreductases	Biosynthesis of secondary metabolites；Monoterpenoid biosynthesis	GO:0005783 GO:0005902 GO:0047021 GO:0042335 GO:0031090 GO:0001542 GO:0009820 GO:0042373 GO:0005634 GO:0042376 GO:0005739 GO:0016740 GO:0065007 GO:0034698 GO:0000253 GO:0047037 GO:0000038 GO:0050221 GO:0009505 GO:0055114 GO:0009507 GO:0005829 GO:0033574 GO:0004090 GO:0017144
GRMZM2G454497	6	99605445	99607659	1514	42	474	11	5.07		polygalacturonase putative expressed		GO:0005737 GO:0044710 GO:0009835 GO:0005618 GO:0019863 GO:0044237 GO:0004650 GO:0009791 GO:0071555 GO:0048513 GO:0005576 GO:0045490 GO:0047911 GO:0042991
GRMZM2G454608	6	99483825	99486082	1164	8	860	11	6.95	P	polygalacturonase putative expressed	Metabolic pathways;Pentose and glucuronate interconversions	GO:0005737 GO:0005975 GO:0071555 GO:0005618 GO:0044237 GO:0004650 GO:0009791 GO:0003006 GO:0048513 GO:0005576 GO:0047911 GO:0009057 GO:0042991
GRMZM2G454789	3	205615692	205623660	1	49	28	37	-4.71		proteasome activating protein 200		GO:0044260 GO:0005740 GO:0006807 GO:0044281 GO:0003676 GO:0006508 GO:0008168 GO:0032259 GO:0008236
GRMZM2G455557	9	13775959	13779795	210	3	67	18	5.65	P	plasma membrane ATPase putative expressed	Metabolic pathways;Oxidative phosphorylation	GO:0042138 GO:0009414 GO:0009651 GO:0000166 GO:0046130 GO:0010023 GO:0015992 GO:0010089 GO:0031410 GO:0016021 GO:0007129 GO:0005774 GO:0046872 GO:0009207 GO:0005794 GO:0019761 GO:0009154 GO:0034220 GO:0010119 GO:0005886 GO:0009737 GO:0007131 GO:0008553 GO:0009506 GO:0009507 GO:0007033 GO:0007035 GO:0006754 GO:0005634
GRMZM2G457789	6	120864236	120865600	5	151	147	132	-4.73	P	proteasome activating protein 200	Proteasome	GO:0000502 GO:0051536 GO:0006281
GRMZM2G458349	1	295668690	295669825	2156	53	530	53	5.25	P			GO:0005737 GO:0048666 GO:0016787 GO:0005618 GO:0031323 GO:0007166 GO:0004857 GO:0009653 GO:0030100 GO:0051704
GRMZM2G462635	6	135110368	135111326	4865	461	1695	427	3.33	P	invertase/pectin methylesterase inhibitor family protein putative expressed		GO:0005737 GO:0046910 GO:0009607 GO:0019222 GO:0005618 GO:0009987 GO:0030599 GO:0006950 GO:0043086 GO:0051704
GRMZM2G468147	7	47587590	47590525	54	3	37	2	3.71	P	Octicosapeptide/Phox/Bem1p (PB1) domain-containing protein / tetratricopeptide		GO:0044238 GO:0015630 GO:0005773 GO:0050896 GO:0005634 GO:0044237 GO:0016740 GO:0006807 GO:0016043 GO:0007275 GO:0012505
GRMZM2G469721	10	97423612	97424415	6	54	42	34	-3.04		NB-ARC domain-containing disease resistance protein;		GO:0005840 GO:0000166 GO:0006952 GO:0003824 GO:0051707 GO:0006412
GRMZM2G470452	1	208780274	208781843	152	6	49	6	4.38	P	serine/threonine protein phosphatase 2 (PPO, TOPP2)	mRNA surveillance pathway	GO:0030324 GO:0010200 GO:0007498 GO:0000087 GO:0030155 GO:0010228 GO:0030968 GO:0048754 GO:0030261 GO:0007301 GO:0014706 GO:0006499 GO:0046329 GO:0007411 GO:0000022 GO:0072357 GO:0051225 GO:0051301 GO:0008355 GO:0016607 GO:0006139 GO:0051327 GO:0043204 GO:0050665 GO:0005730 GO:0005981 GO:0009738 GO:0007476 GO:0000164 GO:0008542 GO:0007080 GO:0007084 GO:0000777 GO:0050115 GO:0017018 GO:0006984 GO:…
GRMZM2G471240	1	68248585	68250379	155	8	57	6	4.05	P	phospholipase A 2A (IIA, PLA2A, PLP2); patatin putative expressed		GO:0009595 GO:0005783 GO:0009697 GO:0010310 GO:0005773 GO:0009862 GO:0016021 GO:0009867 GO:0016042 GO:0016740 GO:0071456 GO:0047372 GO:0005794 GO:0031966 GO:0002679 GO:0009536 GO:0005886 GO:0009646 GO:0010363 GO:0031408 GO:0010200 GO:0009723 GO:0004620 GO:0005634
GRMZM2G473310	9	115909828	115915380	58	478	671	453	-3.09				GO:0032501 GO:0080090 GO:0005730 GO:0004518 GO:0006810 GO:0005739 GO:0050794 GO:0005654 GO:0016740 GO:0003676 GO:0006955 GO:0051641 GO:0006629
GRMZM2G476810	2	166710355	166713793	22	180	200	183	-3.04		Nuclear pore complex protein GP210	RNA transport	GO:0005794 GO:0005783 GO:0016787 GO:0006139 GO:0016740 GO:0005886 GO:0051234
GRMZM2G477457	8	51721240	51724478	44	1	49	2	4.43	P	potassium transporter putative expressed (ATKT4, ATKUP3, KUP3)		GO:0000325 GO:0009555 GO:0071805 GO:0019761 GO:0016021 GO:0010075 GO:0009674 GO:0005774 GO:0009932 GO:0005886 GO:0019375 GO:0009507
GRMZM2G477879	1	269990792	269993014	42	341	365	299	-3.06		HEAT repeat protein		GO:0043234 GO:0005794 GO:0015630 GO:0031090 GO:0044267 GO:0005773 GO:0003824 GO:0034641 GO:0044249 GO:0010467 GO:0005488 GO:0050789 GO:0040007
GRMZM2G478920	4	3412791	3417080	2000	137	1444	61	3.79	P			GO:0005488 GO:0044237
GRMZM2G481964	7	130350653	130351753	39	3	23	3	3.26	P			GO:0004252 GO:0004222 GO:0005618 GO:0050896 GO:0016021 GO:0016301 GO:0005086 GO:0016773 GO:0005576 GO:0006508 GO:0046486 GO:0006662
GRMZM2G482245	2	171082765	171084387	2464	168	1094	103	3.8	P			GO:0005737 GO:0019222 GO:0005618 GO:0030599 GO:0044237 GO:0004857 GO:0043086 GO:0005488
GRMZM2G503156	3	89617869	89622081	63	1	53	3	4.93	P	AGC (cAMP-dependent cGMP-dependent and protein kinase C) kinase		GO:0005856 GO:0005737 GO:0044710 GO:0005634 GO:0009860 GO:0006468 GO:0048646 GO:0004674 GO:0009827 GO:0007165 GO:0035295 GO:0043687 GO:0005524 GO:0012505
GRMZM2G508931	4	197741431	197742643	325	29	127	5	3.38	P			GO:0006355 GO:0005488 GO:0006366 GO:0016592 GO:0005768 GO:0009507
GRMZM2G538064	5	212039305	212041414	459	40	223	40	3.42	P	glycosyl hydrolase 9A4 (AtGH9A4, GH9A4)	Metabolic pathways;Starch and sucrose metabolism	GO:0010054 GO:0042547 GO:0005802 GO:0009944 GO:0008810 GO:0010089 GO:0010092 GO:0010093 GO:0048440 GO:0030245 GO:0009624 GO:0010051 GO:0005576 GO:0010014 GO:0005769 GO:0009835 GO:0009507 GO:0009505 GO:0009506 GO:0044724
GRMZM2G563732	6	4688669	4691148	5	47	37	16	-3.07	P	Protein of unknown function (DUF1162)		GO:0016787 GO:0070062 GO:0007399 GO:0007626 GO:0035176 GO:0044708 GO:0006914 GO:0016020 GO:0008152 GO:0046907 GO:0005794 GO:0005768 GO:0050896
GRMZM2G570768	4	235040801	235041344	122	3	29	12	4.88	P			GO:0005488 GO:0044237
GRMZM2G700148	9	154686135	154692072	73	597	686	617	-3.08	P	AP-2 complex subunit alpha-2	Endocytosis	GO:0016192 GO:0003824 GO:0006886 GO:0016043 GO:0000139 GO:0030659 GO:0005488 GO:0030131 GO:0030137
GRMZM2G703158	2	122424168	122426261	45	2	21	0	3.87				GO:0090304 GO:0050896 GO:0016043
GRMZM2G703173	2	133927923	133928689	539	7	246	5	6.01	P			GO:0004930 GO:0016021 GO:0004984 GO:0052689 GO:0050911 GO:0034641 GO:0044281 GO:0005886 GO:0046474 GO:0004620 GO:0007186
GRMZM5G818106	6	36308133	36310350	51	1	11	0	4.63	P	alpha/beta-Hydrolases superfamily protein; phospholipase putative expressed		GO:0047714 GO:0005783 GO:0030308 GO:0009695 GO:0009697 GO:0052739 GO:0009693 GO:0010027 GO:0044260 GO:0009863 GO:0009570 GO:0016021 GO:0005811 GO:0009867 GO:0009611 GO:0016740 GO:0019375 GO:0008970 GO:0016036 GO:0098588 GO:0000272 GO:0050832 GO:0042631 GO:0010150 GO:0004806 GO:0010363 GO:0052740 GO:0019433 GO:0005576
GRMZM5G827026	9	155635819	155646588	43	341	425	375	-3.02	P	transcription regulators	RNA degradation	GO:0000288 GO:0006355 GO:0005829 GO:0016020 GO:0000932 GO:0005815 GO:0003824 GO:0030015 GO:0032947 GO:0003676 GO:0006366 GO:0017148 GO:0005680
GRMZM5G838140	4	58564718	58565522	9	94	104	107	-3.31				GO:0004930 GO:0044237
GRMZM5G839744	10	78466557	78467245	150	14	66	18	3.26				GO:0005783 GO:0016021 GO:0006810 GO:0051254 GO:0005739 GO:0006355 GO:0016740 GO:0003676 GO:0006366 GO:0048731 GO:0005634
GRMZM5G841015	2	231055349	231059232	1350	63	975	31	4.33	P	Leucine-rich repeat (LRR) family protein		GO:0005737 GO:0031090 GO:0050896 GO:0016021 GO:0009987 GO:0005199 GO:0016740 GO:0012505 GO:0005634 GO:0007275
GRMZM5G849284	8	19571527	19572717	23	183	200	189	-3.01	P			GO:0051536 GO:0044237 GO:0055114 GO:0005506 GO:0008901 GO:0009055
GRMZM5G852097	1	274348403	274350214	71	4	43	5	3.78	P	Transducin/WD40 repeat-like superfamily protein		GO:0005737 GO:0016787 GO:0006468 GO:0009741 GO:0005834 GO:0005694 GO:0005634 GO:0000151 GO:0016043 GO:0000166 GO:0016567 GO:0009733 GO:0016905 GO:0007275 GO:0030529 GO:0097305 GO:0050789
GRMZM5G856180	10	149437736	149438381	550	33	254	34	3.95	P	cytochrome c putative expressed		GO:0008635 GO:0000159 GO:0020037 GO:0009523 GO:0016021 GO:0005886 GO:0006123 GO:0006122 GO:0006309 GO:0005774 GO:0009507 GO:0005758 GO:0070469 GO:0005506 GO:0005634 GO:0042651 GO:0005829 GO:0045155 GO:0016491
GRMZM5G858471	8	10078647	10080295	4	49	80	82	-3.39		Leucine-tRNA ligase chloroplastic/mitochondrial	Aminoacyl-tRNA biosynthesis	GO:0006429 GO:0006450 GO:0005739 GO:0005524 GO:0004823
GRMZM5G860318	9	84492401	84494067	1121	37	470	26	4.82	P	pectate lyase 3	Pentose and glucuronate interconversions	GO:0044220 GO:0044237 GO:0016740 GO:0005488 GO:0016032 GO:0033644 GO:0008233 GO:0016021
GRMZM5G865579	6	107795878	107796171	19	190	240	175	-3.32		ARM repeat superfamily protein		GO:0005737 GO:0005049 GO:0006611 GO:0016021 GO:0009987 GO:0008536 GO:0005654 GO:0005643 GO:0065007 GO:0005886 GO:0051170
GRMZM5G871013	2	200742137	200743541	547	5	274	2	6.45	P	expansin A24		GO:0005618 GO:0016020 GO:0016798 GO:0009828 GO:0016740 GO:0005576 GO:0048646
GRMZM5G881135	Mt	262384	262761	153	15	26	28	3.2		mitochondrial ribosomal protein S12		GO:0016070 GO:0000049 GO:0006412 GO:0005763 GO:0010468 GO:0003735 GO:0005762 GO:0019843 GO:0050794 GO:0007275 GO:0009507
GRMZM5G893848	7	76561597	76563064	38	316	417	334	-3.09		cytosine specific DNA methyltransferase enzyme		GO:0005737 GO:0006306 GO:0032501 GO:0005721 GO:0005634 GO:0006810 GO:0016043 GO:0009008 GO:0005657 GO:0007165 GO:0010468 GO:0051641
GRMZM5G896902	2	100795013	100795671	2355	139	837	131	4.01	P	Defensin-like protein 6		GO:0044228 GO:0044237 GO:0005198 GO:0039615 GO:0019013 GO:0005488 GO:0030430
GRMZM6G534004	1	270128696	270129208	58	4	16	9	3.49				GO:0005488 GO:0044237
GRMZM6G602171	2	176232722	176233656	236	13	83	1	4.01	P	NADH-ubiquinone reductase complex 1 MLRQ subunit		GO:0006334 GO:0006342 GO:0006473 GO:0005777 GO:0005634 GO:0005751 GO:0032446 GO:0016740 GO:0006357 GO:0005747 GO:0022904 GO:0048518 GO:0016491 GO:0043687 GO:0016021 GO:0016569
*Numbers in in the colum of P1-F, P1-S, P2-F and P2-S are the number of reads in the samples of fertile pool in P1, sterile pool in P1, fertile pool in P2 and sterile pool in P2, respectively.
*log2FC means log2 (fold change) of P1-F/P1-S.
*P in the colum of Expression means the gene is specifically or mainly expressed in pollen/anther according to qteller (http://qteller.maizegdb.org).

## Sheet: DEG in P2
Gene ID	Chr	GeneStart	GeneEnd	P1-F*	P1-S*	P2-F*	P2-S*	log2FC*	Expression*	Function	KEGG	GO
GRMZM2G127418	2	144827059	144828816	47	24	0	42	-5.29		benzoxazinone synthesis14		GO:0005737 GO:0044238 GO:0008757 GO:0016021 GO:0019748 GO:0044249 GO:0034641 GO:0008171 GO:0005886 GO:0044283 GO:0046983 GO:0032259
GRMZM2G003489	1	275536823	275539066	68	80	1	59	-4.77		Heat stress transcription factor A-6b		GO:0005488 GO:0044237
GRMZM2G018353	10	127278005	127279469	0	0	7	106	-3.6		The proton-dependent oligopeptide transporter (POT) family		GO:0006857 GO:0009987 GO:0009624 GO:0003824 GO:0005887 GO:0015197
AC198398.3_FG003	10	7588858	7590240	4	7	3	51	-3.56				GO:0000278 GO:0051726 GO:0005634 GO:0006357 GO:0009790 GO:0010628 GO:0022402 GO:0022403 GO:0046872 GO:0048522
GRMZM5G818101	8	72141439	72143820	23	34	6	61	-3.01		protein phosphatase homolog9	MAPK signaling pathway；Plant hormone signal transduction	GO:0007476 GO:0050826 GO:0043407 GO:0010029 GO:0042742 GO:0009414 GO:0019915 GO:0043169 GO:0042538 GO:0010162 GO:0009862 GO:0005634 GO:0009867 GO:0005739 GO:0010440 GO:0010182 GO:0035970 GO:0009507 GO:0009909 GO:0048767 GO:0006984 GO:0043687 GO:0050832 GO:0010119 GO:0046580 GO:0005886 GO:0010228 GO:0009408 GO:0009788 GO:0010360 GO:0009640 GO:0010205 GO:0048481 GO:0010363 GO:0030968 GO:0004722 GO:…
GRMZM5G856180	10	149437736	149438381	550	33	254	34	3	P	cytochrome c putative expressed		GO:0008635 GO:0000159 GO:0020037 GO:0009523 GO:0016021 GO:0005886 GO:0006123 GO:0006122 GO:0006309 GO:0005774 GO:0009507 GO:0005758 GO:0070469 GO:0005506 GO:0005634 GO:0042651 GO:0005829 GO:0045155 GO:0016491
GRMZM2G126922	5	168561557	168563942	441	34	263	35	3.01	P	SNARE domain containing protein putative expressed		GO:0009595 GO:0006887 GO:0000165 GO:0006612 GO:0002831 GO:0006903 GO:0061025 GO:0009695 GO:0009697 GO:0042742 GO:0005484 GO:0030054 GO:0009827 GO:0006984 GO:0010310 GO:0006888 GO:0009862 GO:0016021 GO:0009860 GO:0009867 GO:0009611 GO:0009612 GO:0043269 GO:0043005 GO:0015696 GO:0015698 GO:0009507 GO:0043069 GO:0015672 GO:0048646 GO:0009887 GO:0006862 GO:0050832 GO:0003824 GO:0002679 GO:0012505 GO:…
GRMZM5G852097	1	274348403	274350214	71	4	43	5	3.01	P	Transducin/WD40 repeat-like superfamily protein		GO:0005737 GO:0016787 GO:0006468 GO:0009741 GO:0005834 GO:0005694 GO:0005634 GO:0000151 GO:0016043 GO:0000166 GO:0016567 GO:0009733 GO:0016905 GO:0007275 GO:0030529 GO:0097305 GO:0050789
GRMZM2G095366	8	24873070	24874512	429	84	118	15	3.03		GDSL esterase/lipase		GO:0033879 GO:0010363 GO:1900378 GO:0009820 GO:0005773 GO:0009725 GO:0009963 GO:0016042 GO:0005618 GO:0005576 GO:0023052 GO:0051707 GO:2000762
GRMZM2G034924	4	186369140	186370469	2744	177	998	132	3.05	P	pollen allergen putative expressed		GO:0006310 GO:0016787 GO:0005727 GO:0003677
GRMZM2G088371	3	14976988	14977593	495	34	212	27	3.06	P			GO:0005179 GO:0048046 GO:0044237 GO:0004871
GRMZM2G123365	8	14834886	14836733	276	52	105	13	3.06	P			GO:0033879 GO:0010363 GO:1900378 GO:0009820 GO:0005773 GO:0009725 GO:0005634 GO:0009963 GO:0005739 GO:0016042 GO:0005618 GO:0005576 GO:0023052 GO:0009507 GO:0051707 GO:2000762
GRMZM2G155260	8	5821242	5823980	82	3	52	6	3.06	P	Malectin/receptor-like protein kinase family protein (ANX1)		GO:0033044 GO:0045132 GO:0015706 GO:0042138 GO:0030244 GO:0009791 GO:0010483 GO:0009651 GO:0046777 GO:0007062 GO:0005856 GO:0051327 GO:0010167 GO:0016021 GO:0009860 GO:0004674 GO:0048513 GO:0046686 GO:0009507 GO:0009832 GO:0048646 GO:0009827 GO:0048767 GO:0060187 GO:0048193 GO:0016324 GO:0043680 GO:0050832 GO:0030048 GO:0006833 GO:0012505 GO:0006972 GO:0009266 GO:0007131 GO:0009506 GO:0090404 GO:…
GRMZM2G327357	3	216086839	216089671	3379	555	2741	360	3.06	P			GO:0005618 GO:0016020 GO:0044237 GO:0005576 GO:0005509 GO:0007155
GRMZM2G317406	10	111861870	111862808	6415	387	2269	296	3.07	P	Pollen allergen and extensin family protein (POEI20)		GO:0007030 GO:0032501 GO:0005615 GO:0016021 GO:0006816 GO:0005622 GO:0003824 GO:0019344 GO:0065007 GO:0009651
GRMZM2G142584	8	118896318	118898981	4870	436	3045	392	3.09	P	monocopper oxidase putative expressed	Metabolic pathways;Ascorbate and aldarate metabolism	GO:0048569 GO:0048046 GO:0046658 GO:0008447 GO:0009825 GO:0052716 GO:0005615 GO:0010584 GO:0043481 GO:0005774 GO:0009506 GO:0046688 GO:0005507 GO:0016126 GO:0052541 GO:0046274 GO:0048767 GO:0080167 GO:0052546 GO:0010817 GO:0010228 GO:0010227 GO:0009505 GO:0055114 GO:0009834 GO:0009913 GO:0009932
AC205012.3_FG002	8	76950907	76952642	298	44	124	15	3.1	P	Phosphatidylinositol 4-kinase gamma 3		GO:0043234 GO:0004430 GO:0031410 GO:0005829 GO:0005777 GO:0050789 GO:0005654 GO:0004674 GO:0012505 GO:0046854 GO:0009651 GO:0046777 GO:0009507
GRMZM2G160113	3	69379611	69380680	1372	75	687	87	3.1	P	soybean gene regulated by cold-2 (SRC2)		GO:0032502 GO:0016787 GO:0012505 GO:0016192 GO:0098588 GO:0009987 GO:0030659 GO:0045202 GO:0005488 GO:0050896 GO:0051641
GRMZM2G353957	3	103186921	103189726	66	7	38	4	3.1	P	Calcium-dependent protein kinase 1		GO:0015629 GO:0080092 GO:0005789 GO:0010359 GO:0009651 GO:0046777 GO:0009827 GO:0009751 GO:0031982 GO:0005773 GO:0005634 GO:0005777 GO:0004674 GO:0005509 GO:0046686 GO:0005524 GO:0043687 GO:0010119 GO:0005886 GO:0009789 GO:0031090 GO:0005829 GO:2000026
GRMZM2G456923	8	1823616	1829410	67	20	62	7	3.11		zinc induced facilitator-like 2		GO:0009536 GO:0031410 GO:0016021 GO:0009624 GO:0044237 GO:0055085 GO:0015075 GO:0003824 GO:0006811 GO:0012505 GO:0080167 GO:0005886 GO:0010043 GO:0055069 GO:0005634 GO:0009705
GRMZM2G122816	1	11523362	11525233	2868	241	1028	129	3.12	P	peroxidase precursor putative expressed	Metabolic pathways;Biosynthesis of secondary metabolites；Phenylpropanoid biosynthesis	GO:0015706 GO:0048046 GO:0042744 GO:0010106 GO:0009534 GO:0010167 GO:0009863 GO:0005739 GO:0098869 GO:0055114 GO:0071456 GO:0048767 GO:0020037 GO:0070301 GO:0050832 GO:0002679 GO:0009505 GO:0009506 GO:0010200 GO:0009664 GO:0010363 GO:0009913 GO:0004601
GRMZM2G381357	7	130527125	130527700	418	21	205	25	3.12	P			GO:0006259 GO:0006342 GO:0043687 GO:0005488
GRMZM2G424509	6	132076708	132077510	796	29	215	26	3.14	P	RALF		GO:0005179 GO:0019722 GO:0044237 GO:0005622 GO:0048046 GO:0004871 GO:0009506
GRMZM2G402027	10	139025210	139031110	273	47	137	16	3.16	P	C2H2-type zinc finger family protein		GO:0005737 GO:0016604 GO:0050896 GO:0030154 GO:0030529 GO:0006355 GO:0048513 GO:0000785 GO:0008270 GO:0003676 GO:0016021
GRMZM2G041493	2	118086762	118087924	2633	216	773	93	3.18	P			GO:0016740 GO:0005488 GO:0044237
GRMZM2G471240	1	68248585	68250379	155	8	57	6	3.19	P	phospholipase A 2A (IIA, PLA2A, PLP2); patatin putative expressed		GO:0009595 GO:0005783 GO:0009697 GO:0010310 GO:0005773 GO:0009862 GO:0016021 GO:0009867 GO:0016042 GO:0016740 GO:0071456 GO:0047372 GO:0005794 GO:0031966 GO:0002679 GO:0009536 GO:0005886 GO:0009646 GO:0010363 GO:0031408 GO:0010200 GO:0009723 GO:0004620 GO:0005634
GRMZM2G111710	8	24734357	24736191	387	71	108	12	3.2	P	GDSL-like Lipase		GO:0033879 GO:0010363 GO:1900378 GO:0009820 GO:0005773 GO:0009725 GO:0005634 GO:0009963 GO:0005739 GO:0016042 GO:0005618 GO:0005576 GO:0023052 GO:0009507 GO:0051707 GO:2000762
GRMZM2G450055	4	173741726	173749650	3056	255	1903	227	3.2		Minichromosome maintenance (MCM2/3/5) family protein (MCM5)	DNA replication	GO:0000084 GO:0031939 GO:0030174 GO:0000785 GO:0000784 GO:0031261 GO:0051567 GO:0031298 GO:0042555 GO:0000727 GO:0051322 GO:0006343 GO:0005656 GO:0006267 GO:0006268 GO:0009909 GO:0031390 GO:0042023 GO:0010389 GO:0000911 GO:0006338 GO:0000712 GO:0006271 GO:0003688 GO:0005524 GO:0003678 GO:0003682 GO:0005829
GRMZM2G153368	5	187016197	187017094	1735	184	563	66	3.21	P			GO:0005737 GO:0004518 GO:0009987 GO:0007275 GO:0006952 GO:0005576 GO:0005886 GO:0003677 GO:0009505
GRMZM2G078804	7	24834018	24835345	3043	318	1626	186	3.26	P	Plant invertase/pectin methylesterase inhibitor superfamily protein		GO:0005737 GO:0032501 GO:0019222 GO:0005618 GO:0009987 GO:0030599 GO:0030001 GO:0005488 GO:0004857 GO:0043086
GRMZM2G089699	9	152409062	152410472	2551	254	1167	128	3.32	P	expansin B2 (ATEXPB2)		GO:0009664 GO:0005618 GO:0019953 GO:0016798 GO:0016740 GO:0005576 GO:0048646
GRMZM2G059538	4	31136572	31139249	59	14	54	5	3.33	P	secretory carrier-associated membrane protein 5 putative expressed		GO:0030665 GO:0006892 GO:0030672 GO:0055038 GO:0007616 GO:0016079 GO:0016021 GO:0006898 GO:0005739 GO:0005769 GO:0061025 GO:0015031 GO:0032588 GO:0005886 GO:0004672 GO:0042589 GO:0005634
GRMZM2G053839	2	11942041	11950776	149	28	206	21	3.37	P			GO:0007010 GO:0015629 GO:0005634 GO:0006810 GO:0007275 GO:0003779 GO:0065007 GO:0030127
GRMZM2G076343	2	113942560	113944041	19	10	37	3	3.38		Leguminous lectin family		GO:0016021 GO:0004672 GO:0030246 GO:0044237 GO:0000166
GRMZM2G038001	5	98488964	98492602	222	22	97	9	3.43	P	glycerophosphoryl diester phosphodiesterase family protein putative expressed		GO:0048046 GO:0046658 GO:0005488 GO:0045010 GO:0005982 GO:0010442 GO:0016740 GO:0048513 GO:0006071 GO:0009507 GO:0048646 GO:0016126 GO:0052541 GO:0048767 GO:0052546 GO:0046165 GO:0000272 GO:0007155 GO:0009505 GO:0009506 GO:0044724 GO:0042545 GO:0009832 GO:0008889 GO:0009913 GO:0050896 GO:0010075 GO:0016051 GO:0010090 GO:0009932 GO:2000026
GRMZM2G458349	1	295668690	295669825	2156	53	530	53	3.43	P			GO:0005737 GO:0048666 GO:0016787 GO:0005618 GO:0031323 GO:0007166 GO:0004857 GO:0009653 GO:0030100 GO:0051704
GRMZM2G024887	10	132724522	132726075	1039	60	324	32	3.44	P	GATA type zinc finger transcription factor family protein		GO:0015629 GO:0030427 GO:0061025 GO:0008270 GO:0060048 GO:0030018 GO:0031433 GO:0035995 GO:0007517 GO:0005634 GO:0003300 GO:0002026 GO:0055003 GO:0006874 GO:0051017 GO:0051015 GO:0050794 GO:0003824 GO:0045214 GO:0005938 GO:0005886 GO:0001974
GRMZM2G344857	2	146624792	146628668	133	7	98	9	3.44	P	Phosphatidylinositol-4-phosphate 5-kinase family protein	Metabolic pathways;Inositol phosphate metabolism；Phosphatidylinositol signaling system；Endocytosis	GO:0006520 GO:0072583 GO:0005789 GO:0007164 GO:0009827 GO:0010311 GO:0001727 GO:0005634 GO:0009860 GO:0065007 GO:0043005 GO:0009846 GO:0009908 GO:0048645 GO:0016308 GO:0016324 GO:0048768 GO:0051015 GO:0030048 GO:0006950 GO:0009536 GO:0003785 GO:0005975 GO:0035295 GO:0090406 GO:0046854 GO:0009913 GO:0006499 GO:0009958 GO:0044445 GO:0006412 GO:0010118
GRMZM2G059785	9	116467631	116469153	54	63	119	11	3.46	P	expansin B2 (ATEXPB2, ATHEXP BETA 1.4, EXPB2)		GO:0005794 GO:0009664 GO:0005829 GO:0019953 GO:0016798 GO:0016740 GO:0005576 GO:0005488 GO:0009506 GO:0009505 GO:0048646
GRMZM2G482245	2	171082765	171084387	2464	168	1094	103	3.53	P			GO:0005737 GO:0019222 GO:0005618 GO:0030599 GO:0044237 GO:0004857 GO:0043086 GO:0005488
GRMZM2G136400	8	173112421	173119396	159	11	94	8	3.54	P	CBL-interacting protein kinase 20 (CIPK20, PKS18, SnRK3.6)		GO:0010107 GO:0007275 GO:0005856 GO:0042538 GO:0005634 GO:0009860 GO:0051365 GO:0004674 GO:0010540 GO:0019375 GO:0007584 GO:0005524 GO:0009827 GO:0006468 GO:0019722 GO:0043687 GO:0050832 GO:0012505 GO:0005886 GO:0042631 GO:0000911 GO:0005829 GO:0010555 GO:0009788 GO:0010118
GRMZM2G108777	2	117580482	117581043	313	20	180	16	3.55	P	mucin-associated surface protein putative expressed		GO:0005737 GO:0046907 GO:0002768 GO:0006796 GO:0005886 GO:0008168 GO:0008610
AC189771.3_FG001	5	73325084	73325518	2485	159	951	84	3.62				GO:0005737 GO:0005672 GO:0007031 GO:0016881 GO:0006367 GO:0046872 GO:0055114 GO:0016491
GRMZM2G169951	3	2154002	2156459	76	69	66	5	3.62	P	S-type anion channel SLAH3		GO:0016021 GO:0022857 GO:0044237 GO:0003824 GO:0006820 GO:0005488 GO:0005886 GO:0055085
GRMZM2G448511	5	15590888	15591710	781	40	617	52	3.68	P	Dehydrin 13		GO:0009507 GO:0006364 GO:0003676 GO:0005730
GRMZM2G133588	10	34007307	34007944	337	45	81	6	3.69	P	Calcium-binding EF-hand family protein		GO:0043231 GO:0048574 GO:0010200 GO:0015629 GO:0010091 GO:0031410 GO:0005509 GO:0003824 GO:0005576 GO:0012505 GO:0005886 GO:0009646 GO:0051234 GO:0009909 GO:0080164
GRMZM2G399421	4	66881589	66883609	325	34	164	13	3.7	P	polygalacturonase putative expressed	Metabolic pathways;Pentose and glucuronate interconversions	GO:0005737 GO:0005975 GO:0009835 GO:0005618 GO:0010047 GO:0044237 GO:0004650 GO:0071555 GO:0048513 GO:0009901 GO:0010227 GO:0005576 GO:0047911 GO:0009057 GO:0042991
GRMZM2G435294	9	4288790	4298831	194	38	367	30	3.71	P	Myosin family protein with Dil domain；myosin putative expressed (ATXIE, XIE)		GO:0032432 GO:0008021 GO:0048467 GO:0005794 GO:0035371 GO:0007118 GO:0019228 GO:0000329 GO:0030424 GO:0010091 GO:0050808 GO:0036187 GO:0060151 GO:0032869 GO:0030050 GO:0045033 GO:0005934 GO:0032593 GO:0042640 GO:0042641 GO:0031987 GO:0001726 GO:0051645 GO:0042552 GO:0000146 GO:0010089 GO:0000001 GO:0031532 GO:0044708 GO:0009630 GO:0006887 GO:0051643 GO:0032252 GO:0000132 GO:0032402 GO:0048471 GO:…
GRMZM2G042421	3	217635215	217636142	244	25	108	8	3.74	P	Late embryogenesis abundant protein		GO:0048046 GO:0009987 GO:0009737 GO:0016021 GO:0010286 GO:0009611 GO:0000166 GO:0050832 GO:0009409 GO:0009793 GO:0008152 GO:0004672 GO:0009269 GO:0005886 GO:0009644 GO:0005829 GO:0009507
GRMZM2G139431	4	45509939	45510621	1865	109	862	68	3.78	P	expansin B2 (ATEXPB2)		GO:0009664 GO:0044260 GO:0044238 GO:0050896 GO:0030247 GO:0019953 GO:0007275 GO:0034641 GO:0005576 GO:0004553 GO:0050789
GRMZM2G323558	8	5720615	5722217	1185	72	561	44	3.78	P	invertase/pectin methylesterase inhibitor family protein putative expressed		GO:0005737 GO:0046910 GO:0019222 GO:0005618 GO:0050877 GO:0009987 GO:0030599 GO:0051179 GO:0048513 GO:0005488 GO:0043086
GRMZM2G012611	1	241318043	241329110	336	36	329	25	3.8	P			GO:0032502 GO:0044267 GO:0016192 GO:0016772 GO:0016021 GO:0016043 GO:0005622 GO:0065007 GO:0051641
GRMZM2G020761	9	127562919	127567385	11	6	50	3	3.81		Cytochrome P450 709B2		GO:0050616 GO:0009826 GO:0008395 GO:0016131 GO:0005783 GO:0020037 GO:0016709 GO:0005634 GO:0010268 GO:0009820 GO:0044237 GO:0031966 GO:0006066 GO:0009416 GO:0009741 GO:0005506 GO:0005774 GO:0097305 GO:0040008 GO:0055114 GO:0009507
GRMZM2G040088	8	172315227	172316430	163	11	89	6	3.82				GO:0005488 GO:0044237
GRMZM2G007708	6	157544245	157544990	7199	310	2945	225	3.84		expansin B2 (ATEXPB2)		GO:0009664 GO:0030247 GO:0019953 GO:0005576 GO:0008152 GO:0004553 GO:0009653
GRMZM2G156857	8	78520915	78522102	336	4	104	7	3.85		Cysteine-rich secretory proteins Antigen 5 and Pathogenesis-related 1 (CAP)		GO:0016787 GO:0031410 GO:0009987 GO:0006952 GO:0016740 GO:0005488 GO:0008152 GO:0051707 GO:0051179
AC209946.4_FG001	6	73965120	73980838	0	10	39	2	3.87		UB-like protease 1B(ULP1B)		GO:0016070 GO:0016021 GO:0019222 GO:0043687 GO:0005635 GO:0070647 GO:0005739 GO:0005654 GO:0044249 GO:0010467 GO:0005488 GO:0006508 GO:0008234
GRMZM2G137676	7	120006864	120009317	437	37	252	18	3.87	P	pectinesterase putative expressed		GO:0005737 GO:0009827 GO:0019222 GO:0010383 GO:0004857 GO:0009860 GO:0009624 GO:0030599 GO:0043086 GO:0048046 GO:0045330 GO:0007275 GO:0045490 GO:0009505 GO:0090406
GRMZM2G080907	9	78188342	78190469	2166	191	1052	77	3.89	P	FAD-binding Berberine family protein;reticuline oxidase-like protein precursor putative expressed		GO:0008762 GO:0005783 GO:0048046 GO:0009793 GO:0015706 GO:0010583 GO:0010167 GO:0045010 GO:0005773 GO:0016021 GO:0009505 GO:0009506 GO:0071456 GO:0048765 GO:0031966 GO:0002679 GO:0050660 GO:0009407 GO:0005886 GO:0006979 GO:0055114 GO:0009055 GO:0010200 GO:0010090 GO:0050468 GO:0005829 GO:0010197 GO:0009743 GO:0005634
GRMZM2G125356	10	122250862	122253051	1031	95	713	52	3.89	P	pectinesterase putative expressed	Metabolic pathways;Pentose and glucuronate interconversions	GO:0005737 GO:0009827 GO:0046910 GO:0019222 GO:0010383 GO:0009860 GO:0009624 GO:0030599 GO:0009505 GO:0048046 GO:0010054 GO:0045330 GO:0045490 GO:0043086
GRMZM2G139517	4	45593582	45594302	3534	216	1414	104	3.89	P	expansin B2 (ATEXPB2)		GO:0009664 GO:0044238 GO:0050896 GO:0030247 GO:0019953 GO:0050794 GO:0034641 GO:0005576 GO:0034645 GO:0004553 GO:0007275
GRMZM2G369432	1	295803707	295804892	524	11	174	12	3.89	P	invertase/pectin methylesterase inhibitor family protein putative expressed		GO:0005737 GO:0046910 GO:0005618 GO:0030599 GO:0044237 GO:0043086 GO:0005488
GRMZM2G503156	3	89617869	89622081	63	1	53	3	3.89	P	AGC (cAMP-dependent cGMP-dependent and protein kinase C) kinase		GO:0005856 GO:0005737 GO:0044710 GO:0005634 GO:0009860 GO:0006468 GO:0048646 GO:0004674 GO:0009827 GO:0007165 GO:0035295 GO:0043687 GO:0005524 GO:0012505
GRMZM2G397242	7	22512372	22513232	1322	34	314	22	3.91	P	Rapid ALkalinization Factor RALF family protein (RALFL11)		GO:0005179 GO:0004871 GO:0048046 GO:0008152 GO:0048518 GO:0042981
GRMZM2G079574	3	232127856	232128662	1082	71	400	28	3.93	P	pollen allergen putative expressed		GO:0009664 GO:0048731 GO:0019222 GO:0044238 GO:0030247 GO:0019953 GO:0043170 GO:0044249 GO:0005576 GO:0004553 GO:0042221 GO:0035556 GO:0010646
GRMZM2G004408	2	169429655	169431585	142	10	69	4	3.94	P	CRIB domain-containing protein RIC1		GO:0005737 GO:0007010 GO:0050794 GO:0004672 GO:0048518 GO:0051234 GO:0007275
GRMZM2G323499	7	952700	955035	314	14	260	17	3.99		RNA-binding protein		GO:0005737 GO:0044710 GO:0016043 GO:0030529 GO:0005654 GO:0003824 GO:0065007 GO:0003723 GO:0000166 GO:0007275 GO:0006396
GRMZM2G347047	4	168766590	168768510	221	3	116	7	4.01	P	CAMK includes calcium/calmodulin depedent protein kinase		GO:0015629 GO:0080092 GO:0005789 GO:0010359 GO:0009651 GO:0046777 GO:0009827 GO:0009751 GO:0031982 GO:0005773 GO:0005634 GO:0005777 GO:0004674 GO:0005509 GO:0046686 GO:0005524 GO:0043687 GO:0010119 GO:0005886 GO:0009789 GO:0031090 GO:0005829 GO:2000026
GRMZM2G174140	5	26984937	26987030	4	0	44	2	4.04	P			GO:0090304 GO:0050896 GO:0065007 GO:0016043 GO:0044260
GRMZM2G164182	4	188880588	188882130	231	2	75	4	4.06	P	bifunctional monodehydroascorbate reductase and carbonic anhydrasenectarin-3	Metabolic pathways;Nitrogen metabolism	GO:0009535 GO:0009570 GO:0006730 GO:0048731 GO:0065007 GO:0008270 GO:0005886 GO:0010037 GO:0004089
GRMZM2G053749	4	45460668	45461376	5171	211	1392	90	4.07	P	expansin B2 (ATEXPB2)		GO:0009664 GO:0010556 GO:0031326 GO:0050896 GO:0004553 GO:0030247 GO:0019953 GO:0005576 GO:0051171 GO:0006366 GO:0007275
GRMZM2G000122	3	209418903	209419898	97	2	45	2	4.08				GO:0006468 GO:0005964 GO:0031124 GO:0031323 GO:0000166 GO:0044248 GO:0004674 GO:0005978 GO:0006366 GO:0034660 GO:0051641
GRMZM2G099827	5	73181522	73184335	155	14	45	2	4.08	P	Microtubule associated protein (MAP65/ASE1) family		GO:0007631 GO:0031116 GO:0010005 GO:0052096 GO:0034645 GO:0000022 GO:0051225 GO:0005876 GO:0007020 GO:0009536 GO:0051322 GO:0005773 GO:0005634 GO:0009574 GO:0005739 GO:0000922 GO:0000279 GO:0008017 GO:0003824 GO:0072686 GO:0005886 GO:0051233 GO:0043234 GO:0000911 GO:0009524 GO:0019538 GO:0001578 GO:0009624
GRMZM2G029249	7	40328885	40331026	705	37	531	33	4.1	P	P21-Rho-binding family protein (RIC7)		GO:0005737 GO:0050794 GO:0008152 GO:0004672 GO:0048518 GO:0051234 GO:0007275 GO:0003008
GRMZM2G041448	3	143120612	143121112	812	17	274	16	4.15				GO:0005488 GO:0044237
GRMZM2G160526	6	99103865	99105564	3872	262	2243	137	4.16	P	polygalacturonase putative expressed	Metabolic pathways;Pentose and glucuronate interconversions	GO:0005737 GO:0005975 GO:0071555 GO:0005618 GO:0044237 GO:0004650 GO:0009791 GO:0003006 GO:0048513 GO:0005576 GO:0047911 GO:0009057 GO:0042991
GRMZM2G034846	1	98984653	98985598	224	7	81	4	4.17	P	invertase/pectin methylesterase inhibitor family protein putative expressed		GO:0009595 GO:0015824 GO:0000165 GO:0006612 GO:0002831 GO:0031348 GO:0009697 GO:0042742 GO:0009651 GO:0004857 GO:0043086 GO:0005737 GO:0010310 GO:0005618 GO:0009862 GO:0009867 GO:0006096 GO:0046686 GO:0030599 GO:0050832 GO:0006833 GO:0006972 GO:0009266 GO:0010200 GO:0007030 GO:0010363 GO:0043900 GO:0009743
GRMZM2G162461	5	165695594	165700950	1192	116	1261	75	4.19	P	Sec14p-like phosphatidylinositol transfer family protein (COW1, SRH1)		GO:0005794 GO:0006656 GO:0031090 GO:0009913 GO:0015914 GO:0048768 GO:0008526 GO:0003824 GO:0042439 GO:0005488 GO:0005886 GO:0009506 GO:0048527 GO:0009908 GO:0046165 GO:0048646
GRMZM2G121631	4	45484900	45485872	3298	113	1002	59	4.2	P	expansin B2 (ATEXPB2)		GO:0009664 GO:0009892 GO:0006629 GO:0006357 GO:0048869 GO:0030247 GO:0019953 GO:0009790 GO:0048513 GO:0004553 GO:0048518 GO:0065008 GO:0009056 GO:0005576
GRMZM2G452150	1	144075157	144076677	700	53	334	19	4.2	P	polygalacturonase putative expressed	Metabolic pathways;Pentose and glucuronate interconversions	GO:0005737 GO:0005975 GO:0009835 GO:0005618 GO:0044237 GO:0004650 GO:0009791 GO:0071555 GO:0048513 GO:0005576 GO:0047911 GO:0009057 GO:0042991
GRMZM2G477457	8	51721240	51724478	44	1	49	2	4.2	P	potassium transporter putative expressed (ATKT4, ATKUP3, KUP3)		GO:0000325 GO:0009555 GO:0071805 GO:0019761 GO:0016021 GO:0010075 GO:0009674 GO:0005774 GO:0009932 GO:0005886 GO:0019375 GO:0009507
GRMZM2G175243	9	37392815	37393572	3887	217	1515	89	4.21	P			GO:0016787 GO:0016021 GO:0044237 GO:0005622 GO:0034220 GO:0006821 GO:0005488 GO:0005247 GO:0044070
GRMZM2G129635	9	84492350	84494263	1121	37	470	26	4.26	P	Pectin lyase-like superfamily protein	Metabolic pathways;Pentose and glucuronate interconversions	GO:0009827 GO:0009832 GO:0048767 GO:0010075 GO:0030570 GO:0008361 GO:0043481 GO:0009825 GO:0006950 GO:0009932 GO:0009926 GO:0010383 GO:0005576 GO:0045490 GO:0051704 GO:0044724
GRMZM5G860318	9	84492401	84494067	1121	37	470	26	4.26	P	pectate lyase 3	Pentose and glucuronate interconversions	GO:0044220 GO:0044237 GO:0016740 GO:0005488 GO:0016032 GO:0033644 GO:0008233 GO:0016021
GRMZM2G005643	6	157563274	157564427	2040	81	931	48	4.39	P	expansin B2 (ATEXPB2)		GO:0009664 GO:0048856 GO:0030247 GO:0019953 GO:0044237 GO:0005576 GO:0004553
GRMZM2G060937	4	45377610	45378387	2548	134	1092	55	4.42	P	expansin B2 (ATEXPB2)		GO:0009664 GO:0044238 GO:0050896 GO:0030247 GO:0019953 GO:0050794 GO:0034641 GO:0005576 GO:0034645 GO:0004553 GO:0007275
GRMZM2G419452	4	50667856	50668585	492	4	137	6	4.44	P	pollen calcium-binding protein (APC1, PC1)		GO:0012505 GO:0032501 GO:0015629 GO:0031410 GO:0050896 GO:0009987 GO:0003824 GO:0005509 GO:0005886 GO:0043292 GO:0051234 GO:0050789 GO:0043231
GRMZM2G107096	7	21523954	21525113	114	14	39	1	4.46	P			GO:0005737 GO:0016787 GO:0009595 GO:0010310 GO:0010363 GO:0010200 GO:0050832 GO:0002831 GO:0006612 GO:0000165 GO:0009867 GO:0031348 GO:0043900 GO:0009697 GO:0042742 GO:0009862 GO:0009743 GO:0043069 GO:0007275 GO:0016491
GRMZM2G075077	5	33997493	34000691	298	20	205	9	4.5	P			GO:0005737 GO:0044267 GO:0006812 GO:0016021 GO:0016740 GO:0005488
GRMZM2G060400	2	183985910	183988519	194	3	63	2	4.55	P	pectinesterase putative expressed		GO:0005737 GO:0009827 GO:0046910 GO:0019222 GO:0010383 GO:0009860 GO:0009624 GO:0030599 GO:0043086 GO:0048046 GO:0045330 GO:0007275 GO:0045490 GO:0009505 GO:0090406
GRMZM2G508931	4	197741431	197742643	325	29	127	5	4.55	P			GO:0006355 GO:0005488 GO:0006366 GO:0016592 GO:0005768 GO:0009507
GRMZM2G070961	3	220786615	220789596	371	9	149	6	4.56	P	Protein kinase protein with adenine nucleotide alpha hydrolases-like domain		GO:0048440 GO:0016881 GO:0007165 GO:0005856 GO:0044710 GO:0005634 GO:0009860 GO:0004674 GO:0005524 GO:0009827 GO:0006468 GO:0030048 GO:0006950 GO:0012505 GO:0005886 GO:0035295 GO:0004842 GO:0009507 GO:0010092 GO:0010093 GO:0000151 GO:0016567 GO:0002238
GRMZM2G015418	5	34988181	34990447	165	19	247	10	4.63	P	pyrophosphorylase 1 (AtPPa1, PPa1)	Oxidative phosphorylation	GO:0044238 GO:0004427 GO:0005634 GO:0000287 GO:0005739 GO:0006796 GO:0019915 GO:0046686 GO:0005829 GO:0009507
GRMZM2G089409	5	81133	82138	176	0	68	2	4.66	P			GO:0005488 GO:0044237
GRMZM2G357124	3	4752697	4753618	414	2	91	3	4.66	P	RALF		GO:0005179 GO:0019722 GO:0044237 GO:0005622 GO:0048046 GO:0004871 GO:0009506
GRMZM2G139513	4	45569242	45569997	1557	44	630	26	4.68	P	expansin B2 (ATEXPB2)		GO:0009664 GO:0032501 GO:0019953 GO:0044260 GO:0044238 GO:0050896 GO:0030247 GO:0009058 GO:0050794 GO:0034641 GO:0005576 GO:0004553
GRMZM2G478920	4	3412791	3417080	2000	137	1444	61	4.68	P			GO:0005488 GO:0044237
GRMZM2G093772	9	6006724	6008888	96	1	46	1	4.69	P	endonuclease/exonuclease/phosphatase family domain containing protein		GO:0090305 GO:0009944 GO:0052659 GO:0010067 GO:0010588 GO:0009738 GO:0005654 GO:0046856 GO:0046855 GO:0004445 GO:0048519 GO:0046854 GO:0048646 GO:0048765 GO:0032440 GO:0010014 GO:0032957 GO:0052658 GO:0048016 GO:0043234 GO:0004518 GO:0010305 GO:0009913 GO:0005740 GO:0009932 GO:0048439 GO:0009855
GRMZM2G045106	2	229860324	229860809	407	18	310	12	4.72		Cysteine-rich protein with paired CXXXC motifs		GO:0048731 GO:0005488 GO:0016043
GRMZM2G063435	9	152946828	152948794	886	44	566	22	4.76	P	Peroxidase superfamily protein	Metabolic pathways;Biosynthesis of secondary metabolites；Phenylpropanoid biosynthesis	GO:0015706 GO:0048046 GO:0042744 GO:0010106 GO:0009534 GO:0010167 GO:0009863 GO:0005739 GO:0098869 GO:0009506 GO:0071456 GO:0005794 GO:0048767 GO:0020037 GO:0070301 GO:0050832 GO:0002679 GO:0009505 GO:0055114 GO:0010200 GO:0009664 GO:0010363 GO:0009913 GO:0005829 GO:0004601
GRMZM2G050364	8	78644679	78646585	202	2	101	3	4.81	P	aspartyl protease family protein putative expressed		GO:0010310 GO:0007010 GO:0005783 GO:0016709 GO:0010337 GO:0005886 GO:0009627 GO:0048046 GO:0032501 GO:0004190 GO:0030163 GO:0080167 GO:0006508 GO:0010019 GO:0009505 GO:0009507
GRMZM2G112579	3	84917331	84919242	494	30	407	15	4.81	P	Pectin lyase-like superfamily protein	Metabolic pathways;Pentose and glucuronate interconversions	GO:0005737 GO:0005975 GO:0009835 GO:0005618 GO:0044237 GO:0004650 GO:0009791 GO:0071555 GO:0048513 GO:0005576 GO:0047911 GO:0009057 GO:0042991
GRMZM2G122230	3	35555193	35556122	1040	44	510	19	4.81	P	invertase/pectin methylesterase inhibitor family protein putative expressed		GO:0008565 GO:0005737 GO:0007126 GO:0000279 GO:0005618 GO:0030599 GO:0009059 GO:0042157 GO:0007190 GO:0004857 GO:0043086
GRMZM2G323418	9	20163896	20165966	860	24	399	14	4.87	P	Pectin lyase-like superfamily protein	Metabolic pathways;Pentose and glucuronate interconversions	GO:0009827 GO:0016787 GO:0009832 GO:0048767 GO:0010075 GO:0030570 GO:0009825 GO:0043481 GO:0006950 GO:0009932 GO:0009926 GO:0005488 GO:0010383 GO:0005576 GO:0045490 GO:0051704 GO:0044724
AC196130.3_FG002	3	161302581	161302781	482	8	186	6	4.88	P			GO:0005488 GO:0044237
GRMZM2G101069	2	45619967	45622893	978	35	590	21	4.88	P	glutamate decarboxylase 4 (GAD4)	Metabolic pathways;Biosynthesis of secondary metabolites;Butanoate metabolism；Alanine, aspartate and glutamate metabolism；beta-Alanine metabolism ；Taurine and hypotaurine metabolism	GO:2000762 GO:0010167 GO:0048767 GO:0010363 GO:1900378 GO:0031410 GO:0005829 GO:0009963 GO:0004351 GO:0034641 GO:0009536 GO:0030170 GO:0010359 GO:0006536 GO:0046686 GO:0005634 GO:0016021 GO:0009506 GO:0045202
GRMZM2G056221	8	22941113	22942075	391	0	80	2	4.89	P	Rapid ALkalinization Factor RALF family protein (RALFL19)		GO:0005179 GO:0019722 GO:0044237 GO:0005622 GO:0048046 GO:0004871 GO:0009506
GRMZM2G135570	5	59170607	59172542	752	35	297	10	4.9	P	cyclophilin 5 (ATCYP5, CYP19-4); peptidyl-prolyl cis-trans isomerase		GO:0043234 GO:0044710 GO:0030583 GO:0006457 GO:0005783 GO:0030587 GO:0005829 GO:0044351 GO:0000413 GO:0005739 GO:0030529 GO:0016740 GO:0009792 GO:0003755 GO:0042277 GO:0005634 GO:0009507
GRMZM2G012328	2	42991909	42994023	389	5	193	6	4.93	P	Pectinesterase 5	Metabolic pathways;Pentose and glucuronate interconversions	GO:0005737 GO:0009827 GO:0046910 GO:0019222 GO:0010383 GO:0009860 GO:0009624 GO:0030599 GO:0009505 GO:0048046 GO:0010054 GO:0045330 GO:0045490 GO:0043086
GRMZM2G004927	3	228806966	228808514	308	14	227	7	4.97	P	Pectin lyase-like superfamily protein		GO:0005737 GO:0042545 GO:0000003 GO:0010383 GO:0048869 GO:0045330 GO:0009813 GO:0030599 GO:0009505 GO:0030048 GO:0005576 GO:0016572 GO:0045490 GO:0007275 GO:0044724
GRMZM2G148374	4	173746259	173749650	2972	111	1768	61	4.97		H(+)-ATPase 8 (AHA8, HA8)	Metabolic pathways;Oxidative phosphorylation	GO:0042138 GO:0009414 GO:0009651 GO:0000166 GO:0046130 GO:0010023 GO:0015992 GO:0010089 GO:0031410 GO:0016021 GO:0007129 GO:0005774 GO:0046872 GO:0009207 GO:0005794 GO:0019761 GO:0009154 GO:0034220 GO:0010119 GO:0005886 GO:0009737 GO:0007131 GO:0008553 GO:0009506 GO:0009507 GO:0007033 GO:0007035 GO:0006754 GO:0005634
GRMZM2G095895	6	119383008	119383728	3410	92	1546	53	4.98	P			GO:0016787 GO:0005840 GO:0005634 GO:0005739 GO:0016740 GO:0044237 GO:0000444 GO:0009654 GO:0016021 GO:0005488
GRMZM2G130401	6	99713363	99716109	189	3	58	1	5.02	P	polygalacturonase (PGA4)		GO:0005737 GO:0044710 GO:0005975 GO:0071555 GO:0005618 GO:0044237 GO:0004650 GO:0009791 GO:0003006 GO:0048513 GO:0047911 GO:0009057 GO:0005576
GRMZM2G164674	3	209108962	209111500	534	6	383	12	5.02	P	glyoxal oxidase-related putative expressed		GO:0009827 GO:0044238 GO:0005576 GO:0009908 GO:0050896 GO:0009860 GO:0048507 GO:0009790 GO:0043412 GO:0048513 GO:0048827 GO:0045480 GO:0051641 GO:0005874 GO:0050789 GO:0009507
GRMZM2G133113	7	130490576	130491087	650	20	272	8	5.06				GO:0005737 GO:0016787 GO:0005604 GO:0005583 GO:0044237 GO:0005488 GO:0007275
GRMZM2G153262	6	99515285	99516596	143	0	60	1	5.07	P	Pectin lyase-like superfamily protein		GO:0005737 GO:0044710 GO:0005975 GO:0071555 GO:0005618 GO:0044237 GO:0004650 GO:0003006 GO:0005576 GO:0009057 GO:0047911 GO:0007275
GRMZM5G841015	2	231055349	231059232	1350	63	975	31	5.07	P	Leucine-rich repeat (LRR) family protein		GO:0005737 GO:0031090 GO:0050896 GO:0016021 GO:0009987 GO:0005199 GO:0016740 GO:0012505 GO:0005634 GO:0007275
GRMZM2G066432	6	152360857	152363370	131	17	93	2	5.11	P	Protein kinase superfamily protein		GO:0005856 GO:0044710 GO:0009536 GO:0009816 GO:0005634 GO:0000394 GO:0050794 GO:0004674 GO:0023052 GO:0012505 GO:0005886 GO:0007275 GO:0046777 GO:0005524
GRMZM2G300969	10	24619520	24622715	3052	70	1415	43	5.15	P	Leucine-rich repeat (LRR) family protein		GO:0005737 GO:0031090 GO:0016772 GO:0016021 GO:0009987 GO:0048513 GO:0012505 GO:0005634 GO:0050896
AC233959.1_FG006	5	80528351	80529334	1098	28	589	16	5.25	P			GO:0016787 GO:0005819 GO:0044237 GO:0005516 GO:0005886 GO:0005874
GRMZM2G143335	7	39139340	39140490	136	0	70	1	5.29		Proteinase inhibitor propeptide		GO:0005737 GO:0031326 GO:0090304 GO:0005488 GO:0034645 GO:0008236
GRMZM2G160626	6	99117232	99118814	1389	37	891	23	5.35	P	polygalacturonase putative expressed	Metabolic pathways;Pentose and glucuronate interconversions	GO:0005737 GO:0005975 GO:0071555 GO:0005618 GO:0044237 GO:0004650 GO:0009791 GO:0003006 GO:0048513 GO:0005576 GO:0047911 GO:0009057 GO:0042991
GRMZM2G454497	6	99605445	99607659	1514	42	474	11	5.44		polygalacturonase putative expressed		GO:0005737 GO:0044710 GO:0009835 GO:0005618 GO:0019863 GO:0044237 GO:0004650 GO:0009791 GO:0071555 GO:0048513 GO:0005576 GO:0045490 GO:0047911 GO:0042991
GRMZM2G075588	9	153681862	153684408	111	0	79	1	5.46	P	vesicle-associated membrane protein putative expressed		GO:0030670 GO:0006598 GO:0005794 GO:0000087 GO:0072661 GO:0008333 GO:0005789 GO:0005484 GO:0009651 GO:0031201 GO:0009737 GO:0016021 GO:0009963 GO:0016740 GO:0048645 GO:2000762 GO:0048451 GO:0000331 GO:0048453 GO:0006906 GO:0048193 GO:0030141 GO:0006623 GO:0030658 GO:0010118 GO:0005886 GO:0009504 GO:0009506 GO:0009507 GO:0007033 GO:0007030 GO:0010363 GO:1900378 GO:0044351 GO:0031902 GO:0005765 GO:…
GRMZM2G045030	2	229868116	229868601	485	3	281	6	5.47		Cysteine-rich protein with paired CXXXC motifs		GO:0048731 GO:0005488 GO:0016043
GRMZM2G112984	7	174582127	174584270	212	1	80	1	5.48		invertase/pectin methylesterase inhibitor family protein putative expressed	Metabolic pathways;Pentose and glucuronate interconversions	GO:0005737 GO:0009827 GO:0046910 GO:0009624 GO:0010363 GO:1900378 GO:0010383 GO:0009963 GO:0030599 GO:0043086 GO:0048046 GO:0010054 GO:0045330 GO:0009505 GO:0045490 GO:2000762 GO:0090406 GO:0000003
GRMZM2G364349	6	72167999	72169783	2701	91	1098	26	5.48	P	Pectin lyase-like superfamily protein	Metabolic pathways;Pentose and glucuronate interconversions	GO:0009827 GO:0009832 GO:0048767 GO:0010075 GO:0030570 GO:0010383 GO:0009825 GO:0043481 GO:0006950 GO:0009932 GO:0009926 GO:0005886 GO:0006949 GO:0005576 GO:0045490 GO:0051704 GO:0044724
AC209744.3_FG001	3	130287230	130288170	84	0	40	0	5.49	P	Adenine nucleotide alpha hydrolases-like superfamily protein		GO:0005794 GO:0010167 GO:0015706 GO:0005773 GO:0016301 GO:0009889 GO:0016043 GO:0050794 GO:0006826 GO:0006351 GO:0005886 GO:0010106 GO:0002238 GO:0009507
GRMZM2G374375	5	121216432	121218277	1046	12	366	8	5.49	P	Pectin lyase-like superfamily protein	Metabolic pathways;Pentose and glucuronate interconversions	GO:0005737 GO:0005975 GO:0005618 GO:0010047 GO:0044237 GO:0004650 GO:0071555 GO:0048513 GO:0009901 GO:0010227 GO:0005576 GO:0047911 GO:0009057 GO:0042991
GRMZM2G703173	2	133927923	133928689	539	7	246	5	5.5	P			GO:0004930 GO:0016021 GO:0004984 GO:0052689 GO:0050911 GO:0034641 GO:0044281 GO:0005886 GO:0046474 GO:0004620 GO:0007186
AC233881.1_FG006	5	200296333	200297095	665	15	332	7	5.52	P	expansin B2 (ATEXPB2)		GO:0009664 GO:0030246 GO:0005829 GO:0019953 GO:0016798 GO:0005576 GO:0048646 GO:0009505 GO:0009506
GRMZM6G602171	2	176232722	176233656	236	13	83	1	5.53	P	NADH-ubiquinone reductase complex 1 MLRQ subunit		GO:0006334 GO:0006342 GO:0006473 GO:0005777 GO:0005634 GO:0005751 GO:0032446 GO:0016740 GO:0006357 GO:0005747 GO:0022904 GO:0048518 GO:0016491 GO:0043687 GO:0016021 GO:0016569
GRMZM2G394259	6	99529941	99532218	2327	58	1062	24	5.55	P	Exopolygalacturonase	Metabolic pathways;Pentose and glucuronate interconversions	GO:0005737 GO:0005975 GO:0071555 GO:0005618 GO:0044237 GO:0004650 GO:0009791 GO:0003006 GO:0048513 GO:0005576 GO:0047911 GO:0009057 GO:0042991
GRMZM2G442008	5	206074861	206076455	450	0	217	4	5.58	P	Peroxidase 65	Metabolic pathways;Biosynthesis of secondary metabolites；Phenylpropanoid biosynthesis	GO:0015706 GO:0042744 GO:0010359 GO:0010106 GO:0009651 GO:0009044 GO:0009827 GO:0009534 GO:0010167 GO:0009736 GO:0009860 GO:0005739 GO:0005774 GO:0020037 GO:0070301 GO:0009505 GO:0055114 GO:0010054 GO:0009913 GO:0005829 GO:0005576 GO:0004601
GRMZM2G052006	6	169000582	169002394	365	4	177	3	5.61	P	aspartyl protease family protein putative expressed		GO:0016070 GO:0010310 GO:0005783 GO:0048869 GO:0016020 GO:0009627 GO:0009505 GO:0048046 GO:0010467 GO:0004190 GO:0010337 GO:0080167 GO:0010019 GO:0048731 GO:0006508 GO:0009507
GRMZM2G170034	5	188946269	188947853	293	23	132	2	5.61	P	GATA type zinc finger transcription factor family protein		GO:0015629 GO:0030427 GO:0061025 GO:0008270 GO:0060048 GO:0030018 GO:0031433 GO:0035995 GO:0007517 GO:0005634 GO:0003300 GO:0002026 GO:0055003 GO:0006874 GO:0051017 GO:0051015 GO:0050794 GO:0003824 GO:0045214 GO:0005938 GO:0005886 GO:0001974
GRMZM2G401874	4	189366035	189375987	146	4	92	1	5.68	P	Cation-chloride cotransporter 1		GO:0055064 GO:0007638 GO:0006865 GO:0030424 GO:0006821 GO:0055075 GO:0035264 GO:0051452 GO:0032590 GO:0040040 GO:0043204 GO:0006884 GO:0071477 GO:0006813 GO:0015378 GO:0015379 GO:0016324 GO:0016323 GO:0034220 GO:0005887 GO:0044704 GO:0005829 GO:0005802 GO:0008511 GO:0005768 GO:0015171
GRMZM2G352359	2	6316002	6317978	199	1	145	2	5.74	P	pectinesterase putative expressed		GO:0005737 GO:0009827 GO:0043086 GO:0010363 GO:1900378 GO:0009624 GO:0004857 GO:0010383 GO:0009963 GO:0030599 GO:0009684 GO:0048046 GO:0010054 GO:0045330 GO:0009505 GO:0045490 GO:2000762 GO:0090406 GO:0009506 GO:0000003
GRMZM2G066950	2	231543358	231545402	134	4	97	1	5.75	P	invertase/pectin methylesterase inhibitor family protein putative expressed		GO:0005737 GO:0046910 GO:0050896 GO:0005634 GO:0044237 GO:0050794 GO:0071944 GO:0023052 GO:0030599 GO:0048731 GO:0043086
GRMZM2G390678	5	39292865	39295169	1928	25	1080	21	5.76	P	GDSL esterase/lipase EXL3		GO:0005737 GO:0016298 GO:0006629 GO:0009725 GO:0009987 GO:0006950 GO:0023052 GO:0051707
GRMZM2G005798	9	89530371	89532175	158	3	149	2	5.78	P	O-Glycosyl hydrolases family 17 protein (A6)		GO:0048046 GO:0046658 GO:0009793 GO:0009277 GO:0051567 GO:0009651 GO:0008356 GO:0009736 GO:0010584 GO:0005773 GO:0006346 GO:0009926 GO:0016246 GO:0008361 GO:0010015 GO:0009409 GO:0031048 GO:0009505 GO:0009506 GO:0005975 GO:0010075 GO:0009817 GO:0042973
GRMZM2G052825	6	792318	794327	32	42	49	0	5.78		Cytochrome P450 71A26		GO:0032502 GO:0044238 GO:0005783 GO:0020037 GO:0016709 GO:0044550 GO:0005634 GO:0044237 GO:0031966 GO:0044281 GO:0005506 GO:0050896 GO:0055114 GO:0009507
GRMZM2G438378	6	128905006	128908832	196	1	99	1	5.78	P	phospholipase D4	Metabolic pathways;Biosynthesis of secondary metabolites;Glycerophospholipid metabolism；Ether lipid metabolism；Endocytosis	GO:0005783 GO:0005739 GO:0009414 GO:0009651 GO:0030136 GO:0009941 GO:0005773 GO:0005634 GO:0005546 GO:0009845 GO:0005509 GO:0009506 GO:0046466 GO:0004630 GO:0048767 GO:0098588 GO:0046686 GO:0042439 GO:0005886 GO:0009789 GO:0034638 GO:0007030 GO:0005829 GO:0070290 GO:0009873 GO:0010119
GRMZM2G343437	10	8359295	8361689	146	0	50	0	5.81	P	exocyst subunit exo70 family protein C1 (ATEXO70C1, EXO70C1)		GO:0009860 GO:0015706 GO:0009697 GO:0010106 GO:0010102 GO:0009738 GO:0009827 GO:0010167 GO:0070062 GO:0000145 GO:0005634 GO:0006887 GO:0016740 GO:0048354 GO:0033036 GO:0048646 GO:0048193 GO:0005886 GO:0035295 GO:0009644 GO:0090406 GO:0009506 GO:0046907 GO:0042542 GO:0005829 GO:0009627 GO:0002237 GO:0065010
GRMZM2G045096	2	229862926	229863406	39	0	154	2	5.83		Cysteine-rich protein with paired CXXXC motifs		GO:0048731 GO:0016043
GRMZM2G130831	8	170333416	170336357	56	1	52	0	5.86	P	cation/hydrogen exchanger 15 (ATCHX15, CHX15)		GO:0009860 GO:0005789 GO:0010351 GO:0009827 GO:0010583 GO:0015992 GO:0006885 GO:0016021 GO:0005770 GO:0010183 GO:0031969 GO:0006813 GO:0015299 GO:0006623 GO:0034220 GO:0030007 GO:0009407 GO:0005886 GO:0030104 GO:0035295 GO:0010260 GO:0003824
GRMZM2G321870	1	47325849	47327885	517	3	212	3	5.87	P	pectinesterase putative expressed	Metabolic pathways;Pentose and glucuronate interconversions	GO:0005737 GO:0009827 GO:0046910 GO:0019222 GO:0010383 GO:0009860 GO:0009624 GO:0030599 GO:0043086 GO:0048046 GO:0010054 GO:0045330 GO:0009505 GO:0045490 GO:0090406
GRMZM2G151755	5	121087510	121089347	935	8	338	5	5.96		Pectin lyase-like superfamily protein	Metabolic pathways;Pentose and glucuronate interconversions	GO:0005737 GO:0005975 GO:0005618 GO:0010047 GO:0044237 GO:0004650 GO:0071555 GO:0048513 GO:0009901 GO:0010227 GO:0005576 GO:0047911 GO:0009057 GO:0042991
GRMZM2G320175	6	99582016	99584295	3225	55	1881	32	5.97		polygalacturonase putative expressed		GO:0005737 GO:0005975 GO:0071555 GO:0005618 GO:0044237 GO:0004650 GO:0009791 GO:0003006 GO:0048513 GO:0005576 GO:0047911 GO:0009057 GO:0042991
GRMZM2G325653	5	64702557	64709182	80	3	56	0	5.97		Seven transmembrane MLO family protein (ATMLO5, MLO5)		GO:0002376 GO:0016021 GO:0016811 GO:0006952 GO:0005516 GO:0042221 GO:0008219 GO:0051707
GRMZM2G024495	2	144119083	144120612	200	1	58	0	6.02	P	Alpha carbonic anhydrase 1 chloroplastic	Nitrogen metabolism	GO:0009535 GO:0009570 GO:0006730 GO:0048731 GO:0065007 GO:0008270 GO:0005886 GO:0010037 GO:0004089
GRMZM2G047699	8	117807467	117808251	724	3	296	4	6.03	P	Defensin and Defensin-like DEFL family expressed (DEFL4)		GO:0016070 GO:0009607 GO:0007399 GO:0030154 GO:0050794 GO:0006952 GO:0043412 GO:0048513 GO:0023052 GO:0048519 GO:0051179
GRMZM2G431856	4	2054500	2055868	2164	38	1310	21	6.03	P	pectinesterase putative expressed	Metabolic pathways;Pentose and glucuronate interconversions	GO:0005737 GO:0042545 GO:0010383 GO:0005618 GO:0009860 GO:0009813 GO:0030599 GO:0005576 GO:0045490 GO:0045330 GO:0035295 GO:0090406
GRMZM2G037912	1	13863133	13865361	77	0	59	0	6.04	P	vesicle-associated membrane protein 726 (ATVAMP726, VAMP726)		GO:0030670 GO:0006598 GO:0005794 GO:0000087 GO:0072661 GO:0008333 GO:0005789 GO:0005484 GO:0009651 GO:0031201 GO:0009737 GO:0016021 GO:0009963 GO:0016740 GO:0048645 GO:2000762 GO:0048451 GO:0000331 GO:0048453 GO:0006906 GO:0048193 GO:0030141 GO:0006623 GO:0030658 GO:0010118 GO:0005886 GO:0009504 GO:0009506 GO:0009507 GO:0007033 GO:0007030 GO:0010363 GO:1900378 GO:0044351 GO:0031902 GO:0005765 GO:…
GRMZM2G360025	9	153535442	153539177	60	0	60	0	6.07	P			GO:0007399 GO:0006813 GO:0016021 GO:0030154 GO:0044237 GO:0050794 GO:0016740 GO:0005886 GO:0022610
GRMZM2G026568	2	122429137	122431230	131	1	61	0	6.09	P			GO:0005216 GO:0009987 GO:0006950 GO:0006810 GO:0008324
GRMZM2G164785	3	53392404	53393425	2065	53	952	14	6.13	P	expansin B2 (ATEXPB2)		GO:0005794 GO:0009664 GO:0005829 GO:0016798 GO:0019953 GO:0016740 GO:0005576 GO:0009506 GO:0009505 GO:0048646
GRMZM2G144856	5	200097901	200098990	633	14	399	5	6.2	P	expansin B2 (ATEXPB2)		GO:0009664 GO:0005829 GO:0019953 GO:0016798 GO:0016740 GO:0005576 GO:0048646 GO:0009505 GO:0009506
GRMZM2G153217	8	172795693	172797056	97	4	66	0	6.2	P			GO:0005634 GO:0005488 GO:0044237 GO:0005886
GRMZM2G094811	6	99520235	99522243	1976	47	964	13	6.24	P	polygalacturonase putative expressed	Metabolic pathways;Pentose and glucuronate interconversions	GO:0005737 GO:0005975 GO:0071555 GO:0005618 GO:0044237 GO:0004650 GO:0009791 GO:0003006 GO:0048513 GO:0005576 GO:0047911 GO:0009057 GO:0042991
GRMZM2G045064	2	229865520	229866000	84	0	142	1	6.3		Cysteine-rich protein with paired CXXXC motifs		GO:0048731 GO:0016043
GRMZM2G454608	6	99483825	99486082	1164	8	860	11	6.3	P	polygalacturonase putative expressed	Metabolic pathways;Pentose and glucuronate interconversions	GO:0005737 GO:0005975 GO:0071555 GO:0005618 GO:0044237 GO:0004650 GO:0009791 GO:0003006 GO:0048513 GO:0005576 GO:0047911 GO:0009057 GO:0042991
GRMZM2G079661	6	162217833	162219489	393	12	147	1	6.35	P	invertase/pectin methylesterase inhibitor family protein putative expressed		GO:0005737 GO:0046910 GO:0000003 GO:0019222 GO:0005618 GO:0030599 GO:0007275 GO:0043086 GO:0000902
GRMZM2G127236	5	200282154	200283467	328	3	148	1	6.36	P	expansin precursor putative expressed		GO:0005730 GO:0009987 GO:0019953 GO:0003824 GO:0005576 GO:0016592 GO:0007275 GO:0048646
GRMZM2G127106	5	200274645	200279681	1651	28	905	11	6.38	P	expansin B2 (ATEXPB2)		GO:0009664 GO:0005829 GO:0019953 GO:0016798 GO:0016740 GO:0005576 GO:0048646 GO:0009505 GO:0009506
GRMZM2G144898	5	200101418	200102664	333	8	157	1	6.44		expansin B2 (ATEXPB2)		GO:0009664 GO:0005829 GO:0019953 GO:0016798 GO:0016740 GO:0005576 GO:0048646 GO:0009505 GO:0009506
GRMZM5G871013	2	200742137	200743541	547	5	274	2	6.66	P	expansin A24		GO:0005618 GO:0016020 GO:0016798 GO:0009828 GO:0016740 GO:0005576 GO:0048646
GRMZM2G078886	7	24809925	24810872	429	5	287	2	6.72	P	pectinesterase inhibitor domain containing protein expressed		GO:0005737 GO:0009607 GO:0019222 GO:0005618 GO:0009987 GO:0030599 GO:0006950 GO:0004857 GO:0043086 GO:0051704
GRMZM2G072448	1	75210848	75212440	251	38	718	6	6.82	P	Cysteine proteinases superfamily protein		GO:0051603 GO:0005783 GO:0010150 GO:0005618 GO:0009817 GO:0010075 GO:0010282 GO:0005764 GO:0004197 GO:0005488 GO:0031410 GO:0010623 GO:0005615
GRMZM2G134752	4	147679277	147680759	274	2	102	0	6.82	P	GATA type zinc finger transcription factor family protein		GO:0015629 GO:0030427 GO:0061025 GO:0008270 GO:0060048 GO:0030018 GO:0031433 GO:0035995 GO:0007517 GO:0005634 GO:0003300 GO:0002026 GO:0055003 GO:0006874 GO:0051017 GO:0051015 GO:0050794 GO:0003824 GO:0045214 GO:0005912 GO:0005911 GO:0005886 GO:0001974 GO:0005938
GRMZM2G418644	10	14695948	14698281	6643	129	4685	35	7.16		polygalacturonase putative expressed	Metabolic pathways;Pentose and glucuronate interconversions	GO:0005737 GO:0005975 GO:0071555 GO:0005618 GO:0044237 GO:0004650 GO:0009791 GO:0003006 GO:0048513 GO:0005576 GO:0047911 GO:0009057 GO:0042991
GRMZM2G443740	2	130242303	130245355	205	1	144	0	7.32	P	methyltransferase putative expressed		GO:0005975 GO:0044260 GO:0016021 GO:0005802 GO:0005789 GO:0009058 GO:0006807 GO:0048731 GO:0008168 GO:0032259 GO:0005768 GO:0009506 GO:0000139
GRMZM2G110025	5	200244246	200245597	787	7	404	1	7.8	P	expansin precursor putative expressed		GO:0009664 GO:0005829 GO:0019953 GO:0016798 GO:0016740 GO:0005576 GO:0048646 GO:0009505 GO:0009506
GRMZM2G150350	4	74057426	74058828	414	0	219	0	7.92	P	aspartic proteinase nepenthesin-1 precursor putative expressed		GO:0005794 GO:0044710 GO:0005770 GO:0044260 GO:0004190 GO:0016020 GO:0048046 GO:0065007 GO:0080167 GO:0006508 GO:0009505
GRMZM2G109973	5	200224630	200225916	683	6	395	0	8.77	P	expansin precursor putative expressed		GO:0005794 GO:0009664 GO:0005829 GO:0016798 GO:0019953 GO:0016740 GO:0005576 GO:0009506 GO:0009505 GO:0048646
GRMZM2G128549	10	144177414	144179985	1055	6	839	0	9.85	P	pectinesterase putative expressed		GO:0005737 GO:0042545 GO:0046910 GO:0000003 GO:0019222 GO:0005618 GO:0048869 GO:0016021 GO:0005886 GO:0030599 GO:0007275 GO:0010383 GO:0045330 GO:0045490 GO:0043086 GO:0009506 GO:0044724
*Numbers in in the colum of P1-F, P1-S, P2-F and P2-S are the number of reads in the samples of fertile pool in P1, sterile pool in P1, fertile pool in P2 and sterile pool in P2, respectively.
*log2FC means log2 (fold change) of P2-F/P2-S.
*P in the colum of Expression means the gene is specifically or mainly expressed in pollen/anther according to qteller (http://qteller.maizegdb.org).
