# Supplementary material for: Identification of fertility-related genes for maize CMS-S via Bulked Segregant RNA-Seq
Source: PeerJ. 2020 Sep 30;8:e10015. doi: 10.7717/peerj.10015 (PMC7532766; doi:10.7717/peerj.10015)
Supplement: Table S2 [file peerj-08-10015-s007.xls]

## Sheet: Sheet1
Primer name of DEGs	Sequence 5'-3'
AC209946.4_FG001F	TTGTTGTGCTTAATGCC
AC209946.4_FG001R	AGGCAACTTGAAGGTCTGGCCA
GRMZM2G020761F	CGTGGGGCCAATAAAACTGC
GRMZM2G020761R	ATCGGACTGAACTCGTCTGC
GRMZM2G024680F	CCACTTCCCAGCAGACAGAG
GRMZM2G024680R	GAAAGTTCTGCAGCGTCAGC
GRMZM2G024887F	TGTGCAGCTTGCCAGAAAAC
GRMZM2G024887R	TGGGACGGGCTCTTCTTCAT
GRMZM2G045030F	GTGGTGGCAAGATCGTTGTG
GRMZM2G045030R	TTGCCTTCTTCGCTAGGCTT
GRMZM2G072448F	TCTAGCTGCTGGGCATTCG
GRMZM2G072448R	CGTTCTGGATCACCCACCTG
GRMZM2G109973F	TTGATGCAGGCACAAGTTGC
GRMZM2G109973R	TTGTTCACGTCCTTGTACCCG
GRMZM2G127418F	TAGTCGGGTATGGGCAGTCA
GRMZM2G127418R	GCCAGCTACTGGTCGGATTT
GRMZM2G300969F	GATCCCCGTGCTCAAGTACC
GRMZM2G300969R	GATGAAGGCGTTGTTTGCGA
GRMZM2G322493F	TAGAGTCGTTCGCATCGTCG
GRMZM2G322493R	CGTTGCATCTCACCAAGCTG
GRMZM2G339781F	GAGATGGCCTGCACCAAGAG
GRMZM2G339781R	GTGCAACATGTGCGTTTCGT
GRMZM2G347047F	ACCATGAGGCACACCTCTGA
GRMZM2G347047R	GACGACACTACTCTTGCCCG
GRMZM2G390678F	CTTGGGTTGAAGGAGACGCT
GRMZM2G390678R	CTCCACAATGTCGTTGCTGC
GRMZM2G401874F	TGGGAGCAAACAGCGTACAT
GRMZM2G401874R	CCTCGACCGATTCGTGGTAG
GRMZM2G419452F	GGCTCTGCGGACTCTGGG
GRMZM2G419452R	CAGAAGACCTTTGCGACGTCCT
GRMZM2G435294F	GTTCAGCCTGGGATGAGCTT
GRMZM2G435294R	GTACCGGACAAAGGTCGTGA
GRMZM2G454608F	TGGTCCTCTTCTGCATCGTG
GRMZM2G454608R	GCCTGTAAAGTTGAGTTGTCCG
GRMZM2G457789F	TGCCGGTCCTACCTTACTCA
GRMZM2G457789R	GCGAAGGAGATGATCCCCAG
